# Supplementary material for: Molecular and In Vivo Characterization of Cancer-Propagating Cells Derived from MYCN-Dependent Medulloblastoma
Source: PLoS One. 2015 Mar 18;10(3):e0119834. doi: 10.1371/journal.pone.0119834 (PMC4365014; doi:10.1371/journal.pone.0119834)
Supplement: S1 Table — (XLSX) [file pone.0119834.s012.xlsx]

## Sheet: All assays
	other name	FP	RP	*Cqthreshold	Assay ID	Assay Name	Design RefSeq	Blast Hits	Gene Symbol	Gene Aliases	Gene Full Name	GO Function	GO Process	GO Component
Acta1		ACCCAGGGCCAGAGTCA	AGCCGTTGTCACACACAAGA	rejected	GEA00053931	Acta1_53931_i0	NM_009606.2	NM_009606.2	Acta1	Acts|Acta-2|Actsk-1|AA959943	actin, alpha 1, skeletal muscle	ATP binding|nucleotide binding	skeletal muscle fiber development|skeletal muscle thin filament assembly	actin cytoskeleton|actin filament|cytoplasm|cytoskeleton|sarcomere|stress fiber|striated muscle thin filament|striated muscle thin filament
Actb		CCCTAAGGCCAACCGTGAAA	CAGCCTGGATGGCTACGTAC	23	Actb_11830_i2	NM_007393.3	NM_007393.3	NM_007393.3	Actb	Actx; beta-actin; E430023M04Rik	actin, beta	kinesin binding; nitric-oxide synthase binding; protein kinase binding	axonogenesis	MLL5-L complex; NuA4 histone acetyltransferase complex; axon; cortical cytoskeleton; cytosol; cytosol; protein complex; ribonucleoprotein complex; soluble fraction
Aldh2		ATTGAACGGGACCGGACCTA	TCCACCAGGTACGAGATGACA	22	Aldh2_12004_i2	NM_009656.3	NM_009656.3	NM_009656.3	Aldh2	Ahd5; Ahd-5	aldehyde dehydrogenase 2, mitochondrial	aldehyde dehydrogenase (NAD) activity; identical protein binding; oxidoreductase activity	oxidation-reduction process	mitochondrion; mitochondrion
Atf4		GCCAAGCACTTGAAACCTCA	CATCCAATCTGTCCCGGAAAA	23	Atf4_18422_i1	NM_009716.2	NM_009716.2	Atf4	Atf-4; C/ATF; CREB2; MGC96460; TAXREB67	activating transcription factor 4	DNA binding; DNA binding; DNA binding; protein C-terminus binding; protein binding; protein dimerization activity; sequence-specific DNA binding; sequence-specific DNA binding transcription factor activity; specific RNA polymerase II transcription factor activity; transcription activator activity; transcription activator activity	gamma-aminobutyric acid signaling pathway; gluconeogenesis; positive regulation of transcription from RNA polymerase II promoter; positive regulation of transcription from RNA polymerase II promoter; positive regulation of transcription from RNA polymerase II promoter; regulation of transcription; regulation of transcription, DNA-dependent; response to endoplasmic reticulum stress; transcription;…	cytoplasm; cytoplasm; dendrite membrane; membrane; nucleus; nucleus; plasma membrane; transcription factor complex; transcription factor complex
Atoh1		CCGTCCTTCAACAACGACAA	TCCGACAGAGCGTTGATGTA	22	GEA00033034	Atoh1_33034_e0	NM_007500.4	NM_007500.4	Atoh1	Hath1|Math1|MATH-1|bHLHa14	atonal homolog 1 (Drosophila)	DNA binding|chromatin DNA binding|protein binding|sequence-specific DNA binding|transcription regulator activity	apoptosis|auditory receptor cell differentiation|auditory receptor cell differentiation|auditory receptor cell fate determination|auditory receptor cell fate specification|axon guidance|brain development|cell differentiation|cerebral cortex development|inner ear morphogenesis|neuron differentiation|neuron migration|positive regulation of auditory receptor cell differentiation|positive regulation …	nucleus
Atrx		ACACCCTTCACTCAAAGTCC	TCCATCTGAGTCACGGCTA	22	Atrx_11717_i6	NM_009530.2	NM_009530.2	Atrx	XH2; Xnp; ATR2; MRXS3; Rad54; Hp1bp2; RAD54L; ZNF-HX; Hp1bp38; AI447451; HP1-BP38; DXHXS6677E; 4833408C14Rik	alpha thalassemia/mental retardation syndrome X-linked homolog (human)	ATP binding; DNA binding; chromatin binding; chromo shadow domain binding; helicase activity; hydrolase activity; metal ion binding; nucleic acid binding; nucleotide binding; protein binding; zinc ion binding	DNA repair; forebrain development; response to DNA damage stimulus	heterochromatin; nuclear chromosome; nucleus
Bcor		GCTCCCTCTTGCCGTGTTATA	GAGCACGTCTGAGAGCAGAA	21	Bcor_46684_i12	NM_175046.3	NM_001168321.1|NM_175045.3|NM_175044.3|NM_175046.3|NM_029510.3	Bcor	BcorR; mKIAA1575; 5830466J11Rik; 8430401K06Rik; D930024N20Rik	BCL6 interacting corepressor	heat shock protein binding; histone deacetylase binding; promoter binding; protein binding; transcription corepressor activity; transcription corepressor activity; transcription factor binding; transcription repressor activity	chromatin modification; heart development; negative regulation of bone mineralization; negative regulation of gene-specific transcription from RNA polymerase II promoter; negative regulation of histone H3-K36 methylation; negative regulation of histone H3-K4 methylation; negative regulation of tooth mineralization; negative regulation of transcription; negative regulation of transcription; negati…	nucleus; nucleus
beta-catenin	Ctnnb1	CATTGGTGCCCAGGGAGAA	GCCGTATCCACCAGAGTGAAA	21	GEA00011832	Ctnnb1_11832_i13	NM_007614.3	NM_001165902.1|NM_007614.3	Ctnnb1	Mesc|Catnb	catenin (cadherin associated protein), beta 1	DNA binding|I-SMAD binding|R-SMAD binding|RPTP-like protein binding|SMAD binding|alpha-catenin binding|alpha-catenin binding|binding|cadherin binding|cadherin binding|chromatin binding|double-stranded DNA binding|enzyme binding|estrogen receptor binding|ion channel binding|ionotropic glutamate receptor binding|kinase binding|nuclear hormone receptor binding|promoter binding|promoter binding|prote…	Schwann cell proliferation|Schwann cell proliferation|T cell differentiation|T cell differentiation in thymus|Wnt receptor signaling pathway|Wnt receptor signaling pathway|adherens junction assembly|anterior/posterior axis specification|apoptosis|bone resorption|bone resorption|branching involved in ureteric bud morphogenesis|canonical Wnt receptor signaling pathway|canonical Wnt receptor signali…	APC-Axin-1-beta-catenin complex|Axin-APC-beta-catenin-GSK3B complex|Axin-APC-beta-catenin-GSK3B complex|Scrib-APC-beta-catenin complex|Z disc|adherens junction|adherens junction|apical junction complex|apical part of cell|basolateral plasma membrane|beta-catenin-TCF7L2 complex|catenin complex|catenin complex|cell cortex|cell junction|cell projection membrane|cell-cell adherens junction|cell-cell …
Bmi1		CCTGTGTGGAGGGTACTTCA	TGCTGGTCTCCAAGTAACGTA	21	GEA00007859	Bmi1_7859_i1	NM_007552.4	NM_007552.4	Bmi1	Bmi-1|Pcgf4|AW546694	Bmi1 polycomb ring finger oncogene	RING-like zinc finger domain binding|chromatin binding|metal ion binding|protein binding|transcription repressor activity|ubiquitin-protein ligase activity|zinc ion binding	brain development|cellular process|chromatin modification|embryonic skeletal system development|embryonic skeletal system morphogenesis|histone acetylation|histone ubiquitination|humoral immune response|in utero embryonic development|negative regulation of apoptosis|negative regulation of transcription from RNA polymerase II promoter|negative regulation of transcription from RNA polymerase II pro…	PcG protein complex|cytoplasm|nuclear body|nucleolus|nucleus|ubiquitin ligase complex|ubiquitin ligase complex
Btg2		TTTTCAGTAGGGCGCTCCA	CGGATACAGCGATAGCCAGAA	22	GEA00035180	Btg2_35180_i0	NM_007570.2	NM_007570.2	Btg2	Pc3; APRO1; TIS21; AA959598	B-cell translocation gene 2, anti-proliferative	protein binding; sequence-specific regulatory transcription factor site binding RNA polymerase II transcription factor activity involved in positive regulation of transcription from RNA polymerase II promoter	anterior/posterior pattern formation; associative learning; central nervous system neuron development; dentate gyrus development; negative regulation of apoptosis; negative regulation of neural precursor cell proliferation; neuron differentiation; positive regulation of anti-apoptosis; positive regulation of nuclear-transcribed mRNA poly(A) tail shortening; positive regulation of transcription fr…
Ccne1		CTGTGAAAAGCGAGGATAGCA	TGTTAGGGGTGGGGATGAAA	22	GEA00011728	Ccne1_11728_i3	NM_007633.2	NM_007633.2	Ccne1	AW538188	cyclin E1	cyclin-dependent protein kinase regulator activity; kinase activity; protein binding; protein complex binding	DNA-dependent DNA replication initiation; cell cycle; cell division; positive regulation of cell differentiation; protein phosphorylation; protein phosphorylation; regulation of catalytic activity; regulation of cell cycle; regulation of phosphorylation	centrosome; cyclin-dependent protein kinase holoenzyme complex; cytoplasm; cytosol; nucleoplasm; nucleus; nucleus
CD133		GCGATGGACTCTGCTGTTAA	CCTATGCCGAACCAGAACAA	22	GEA00009176	CD133_9176_i21	NM_008935.2	NM_001163585.1|NM_001163584.1|NM_001163583.1|NM_001163582.1|NM_001163581.1|NM_001163578.1|NM_001163577.1|NM_008935.2	Prom1	Prom|AC133|CD133|Prom-1|Proml1|4932416E19Rik	prominin 1	molecular_function	biological_process|camera-type eye photoreceptor cell differentiation|retina layer formation	apical plasma membrane|brush border|cell projection|cell surface|cell surface|cilium|extracellular space|integral to membrane|integral to plasma membrane|membrane|microvillus|photoreceptor outer segment|plasma membrane|stereocilium
Cd15		CGATTTCCCTAATGCTGCTTCC	GGAAGTAGCGGCGATAGACA	22	GEA00013349	Cd15_13349_e0	NM_010242.3	NM_010242.3	Fut4	FAL|LeX|CD15|SSEA-1|FucT-IV|AI451562	fucosyltransferase 4	alpha(1,3)-fucosyltransferase activity|fucosyltransferase activity|transferase activity|transferase activity, transferring glycosyl groups	protein glycosylation	Golgi apparatus|cell surface|integral to membrane|membrane
CDH18		ACCTGAACTTGCCAGGGAATA	TGGCAGTGATGGTGTGGATA	20	GEA00045838	CDH18_45838_i8	NM_001081299.1	NM_001081299.1	Cdh18	Cdh14l|B230220E17Rik	cadherin 18	molecular_function	biological_process|cell adhesion	integral to membrane|membrane|plasma membrane
Cdkn1a		GAACATCTCAGGGCCGAAAAC	TCTGCGCTTGGAGTGATAGAA	22	GEA00011737	Cdkn1a_11737_i1	NM_007669.4	NM_001111099.1|NM_007669.4	Cdkn1a	P21; CDKI; CIP1; SDI1; Waf1; mda6; CAP20; Cdkn1; p21WAF; p21Cip1	cyclin-dependent kinase inhibitor 1A (P21)	cyclin binding; cyclin-dependent protein kinase inhibitor activity; cyclin-dependent protein kinase inhibitor activity; kinase activity; metal ion binding; protein binding; protein complex binding; protein kinase inhibitor activity	DNA damage response, signal transduction by p53 class mediator resulting in cell cycle arrest; G1/S transition of mitotic cell cycle; G2/M transition of mitotic cell cycle; cell cycle; cell cycle arrest; cell cycle arrest; cellular response to extracellular stimulus; cellular response to ionizing radiation; negative regulation of apoptosis; negative regulation of cell growth; negative regulation …	PCNA-p21 complex; cyclin-dependent protein kinase holoenzyme complex; cyclin-dependent protein kinase holoenzyme complex; cytoplasm; cytosol; cytosol; nucleoplasm; nucleus; nucleus
Crabp1		AGGGCTTCGAGGAGGAGAC	CCAGCTCTCGGGTCCAGTAA	20	GEA00037757	Crabp1_37757_i1	NM_013496.2	NM_013496.2	Crabp1	Rbp-5; CrabpI; Crabp-1; AI326249	cellular retinoic acid binding protein I	binding; lipid binding; retinal binding; retinoid binding; retinol binding; transporter activity	transport	cytoplasm
CyclinD1	Ccnd1	TGCCGAGAAGTTGTGCATCTA	TGTTCACCAGAAGCAGTTCCA	21	GEA00007896	Ccnd1_7896_i1	NM_007631.2	NM_007631.2	Ccnd1	cD1|Cyl-1|PRAD1|bcl-1|AI327039	cyclin D1	cyclin-dependent protein kinase regulator activity|enzyme binding|kinase activity|protein binding|protein complex binding|protein kinase activity|protein kinase binding|protein kinase binding	G1/S transition of mitotic cell cycle|Leydig cell differentiation|canonical Wnt receptor signaling pathway|cell cycle|cell division|cellular response to protein stimulus|endoplasmic reticulum unfolded protein response|fat cell differentiation|lactation|lactation|mammary gland alveolus development|mammary gland alveolus development|mammary gland epithelial cell proliferation|mitotic cell cycle G1/…	cyclin-dependent protein kinase holoenzyme complex|cyclin-dependent protein kinase holoenzyme complex|cytoplasm|cytosol|cytosol|intracellular|nucleoplasm|nucleoplasm|nucleus|nucleus
Dkk2		CCACACTCCAAGATGCCTCA	CGAGCACAACAAAACCCATCA	rejected	GEA00022976	Dkk2_22976_i2	NM_020265.4	NM_020265.4	Dkk2		dickkopf homolog 2 (Xenopus laevis)		Wnt receptor signaling pathway|multicellular organismal development|negative regulation of Wnt receptor signaling pathway|negative regulation of canonical Wnt receptor signaling pathway	extracellular region|extracellular space
Dppa3		TGAAGAGGACGCTTTGGATGA	CCGGGGTTTAGGGTTAGCTT	rejected	GEA00037816	Dppa3_37816_i0	NM_139218.1	NM_139218.1	Dppa3	PCG7; PGC7; Stella; MGC117617; MGC130308; MGC130309; 2410075G02Rik	developmental pluripotency-associated 3		embryonic cleavage	cytoplasm; female pronucleus; male pronucleus; nucleus
Dyrk2		GCCAGCAACGCTACCACTA	TGAGGTGGAGGTGGTCATTCA	22	GEA00036576	Dyrk2_36576_i1	NM_001014390.2	NM_001014390.2	Dyrk2	1810038L18Rik	dual-specificity tyrosine-(Y)-phosphorylation regulated kinase 2	ATP binding|kinase activity|magnesium ion binding|manganese ion binding|nucleotide binding|protein kinase activity|protein serine/threonine kinase activity|protein tyrosine kinase activity|transferase activity	DNA damage response, signal transduction by p53 class mediator resulting in induction of apoptosis|apoptosis|metabolic process|peptidyl-tyrosine phosphorylation|phosphorylation|positive regulation of glycogen biosynthetic process|protein phosphorylation	cytoplasm|intracellular membrane-bounded organelle|nucleus
E2F1		AGCTCATTGCCAAGAAGTCC	TTCAAGCCGCTTACCAATCC	22	GEA00012837	E2f1_12837_i2	NM_007891.4	NM_007891.4	E2f1	E2F-1; KIAA4009; mKIAA4009	E2F transcription factor 1	DNA binding; protein binding; sequence-specific DNA binding; sequence-specific DNA binding transcription factor activity; sequence-specific DNA binding transcription factor activity; transcription activator activity; transcription factor binding; transcription factor binding	apoptosis; cell cycle; forebrain development; mRNA stabilization; positive regulation of gene expression; positive regulation of transcription from RNA polymerase II promoter; positive regulation of transcription, DNA-dependent; regulation of cell cycle; regulation of transcription; regulation of transcription, DNA-dependent; transcription, DNA-dependent	cytoplasm; mitochondrion; nucleoplasm; nucleus; nucleus; transcription factor complex
E2F2		TGGAGGGTATCCAGCTCATC	TCGGGTGGGGTCTTCAAATA	22	GEA00053933	E2f2_53933_i2	NM_177733.6	NM_177733.6	E2f2	9230110J10|E130207A07	E2F transcription factor 2	DNA binding|protein binding|sequence-specific DNA binding transcription factor activity|transcription factor binding	apoptosis|cell cycle|regulation of cell cycle|regulation of transcription|regulation of transcription, DNA-dependent|transcription|transcription, DNA-dependent	nucleoplasm|nucleus|transcription factor complex
Emx2		CTCATCCACCGCTACCGATA	GAGCGTTGTGCAAAAGGAAAC	23	GEA00036589	Emx2_36589_i0	NM_010132.2	NM_010132.2	Emx2	Pdo	empty spiracles homolog 2 (Drosophila)	DNA binding|sequence-specific DNA binding|sequence-specific DNA binding transcription factor activity|transcription regulator activity	anterior/posterior pattern formation|anterior/posterior pattern formation|brain development|cell proliferation in forebrain|cerebral cortex development|cerebral cortex regionalization|cerebral cortex regionalization|dentate gyrus development|forebrain cell migration|forebrain development|forebrain development|multicellular organismal development|neuron differentiation|regulation of gene expressio…	nucleus
Eomes		ACCGGCACCAAACTGAGAT	GGGGTTGAGTCCGTTTATGTTG	rejected	GEA00053930	Eomes_53930_i0	NM_010136.3	NM_010136.3|NM_001164789.1	Eomes	Tbr2|TBR-2|C77258	eomesodermin homolog (Xenopus laevis)	DNA binding|sequence-specific DNA binding transcription factor activity	CD8-positive, alpha-beta T cell differentiation involved in immune response|CD8-positive, alpha-beta T cell differentiation involved in immune response|blastocyst development|brain development|cell differentiation|cell differentiation involved in embryonic placenta development|cerebral cortex neuron differentiation|endoderm formation|gastrulation|mesoderm formation|mesodermal to mesenchymal trans…	intracellular|nucleus
Esrrb		GGCGTTCTTCAAGAGAACCA	CTCCGTTTGGTGATCTCACA	22	GEA00018401	Esrrb_18401_i1	NM_011934.4	NM_001159500.1|NM_011934.4	Esrrb	Err2; Errb; Nr3b2; Estrrb	estrogen related receptor, beta	DNA binding; ligand-dependent nuclear receptor activity; metal ion binding; receptor activity; sequence-specific DNA binding; sequence-specific DNA binding transcription factor activity; steroid hormone receptor activity; zinc ion binding	embryonic placenta development; in utero embryonic development; regulation of transcription; regulation of transcription, DNA-dependent; stem cell maintenance; transcription; trophectodermal cell proliferation; trophectodermal cellular morphogenesis	nucleus
Fgf4		TGGTGTGCACGCAGACAC	GCCACTCCGAAGATGCTCAC	rejected	GEA00011861	fgf4_11861_i0	NM_010202.5	NM_010202.5	Fgf4	KS3|hst|Fgfk|Hst1|kFGF|Fgf-4|hst-1|Hstf-1|MGC129266|MGC129267	fibroblast growth factor 4	fibroblast growth factor receptor binding|growth factor activity	apoptosis involved in morphogenesis|cartilage condensation|chondroblast differentiation|cranial suture morphogenesis|embryonic hindlimb morphogenesis|embryonic limb morphogenesis|fibroblast growth factor receptor signaling pathway|fibroblast growth factor receptor signaling pathway|mesenchymal cell proliferation|negative regulation of apoptosis|odontogenesis of dentine-containing tooth|positive r…	extracellular region|soluble fraction
Fgf8		CATCAACGCCATGGCAGAA	ACTCGGACTCTGCTTCCAAA	22	GEA00022981	Fgf8_22981_i2	NM_010205.2	NM_001166363.1|NM_001166362.1|NM_001166361.1|NM_010205.2	Fgf8	Aigf; Fgf-8; MGC59627	fibroblast growth factor 8	chemoattractant activity; growth factor activity; type 1 fibroblast growth factor receptor binding; type 2 fibroblast growth factor receptor binding	MAPKKK cascade; adrenocorticotropin hormone secreting cell differentiation; apoptosis; blood vessel remodeling; bone development; branching involved in salivary gland morphogenesis; branching involved in salivary gland morphogenesis; branching involved in ureteric bud morphogenesis; cell fate commitment; cell migration involved in mesendoderm migration; cell proliferation in forebrain; central ne…	external side of plasma membrane; extracellular region; extracellular space; soluble fraction
Foxd3		CGCTGGGAATAACTTTCCGTAC	CCCCACAGTACTGAGAACACA	21	GEA00011872	Foxd3_11872_e0	NM_010425.3	NM_010425.3	Foxd3	CWH3; Hfh2; Genesis	forkhead box D3	DNA bending activity; DNA binding; double-stranded DNA binding; double-stranded DNA binding; promoter binding; sequence-specific DNA binding; sequence-specific DNA binding transcription factor activity; sequence-specific enhancer binding RNA polymerase II transcription factor activity; specific RNA polymerase II transcription factor activity; specific transcriptional repressor activity; transcrip…	axon extension involved in axon guidance; branching involved in ureteric bud morphogenesis; cartilage development; embryonic placenta development; enteric nervous system development; in utero embryonic development; iridophore differentiation; kidney development; lateral line nerve glial cell development; melanocyte differentiation; multicellular organismal development; negative regulation of tran…	nucleus; transcription factor complex; transcription factor complex
Foxp3		GACGAGACTTGGAAGACAGTCA	TGGGCATTGGGTTCTTGTCA	rejected	GEA00002574	Foxp3_2574_i1	NM_054039.1	NM_054039.1	Foxp3	sf; JM2; scurfin	forkhead box P3	DNA bending activity; DNA binding; NFAT protein binding; NFAT protein binding; chromatin binding; double-stranded DNA binding; histone acetyltransferase binding; histone acetyltransferase binding; histone deacetylase binding; histone deacetylase binding; metal ion binding; promoter binding; protein heterodimerization activity; protein homodimerization activity; protein homodimerization activity; …	B cell homeostasis; CD4-positive, CD25-positive, alpha-beta regulatory T cell differentiation; T cell activation; T cell activation; T cell mediated immunity; T cell receptor signaling pathway; cytokine production; cytokine production; cytokine production; embryo development; myeloid cell homeostasis; negative regulation of CREB transcription factor activity; negative regulation of CREB transcrip…	cytoplasm; intracellular; nucleus; nucleus; transcription factor complex
Fscn1		TTCAATGACGGCGCCTACAA	ATCACTACCCACCGTCCAGTA	25	GEA00022939	Fscn1_22939_i3	NM_007984.2	NM_007984.2	Fscn1	Fan1; AI663989; fascin-1	fascin homolog 1, actin bundling protein (Strongylocentrotus purpuratus)	actin binding; actin filament binding; actin filament binding; protein binding, bridging	actin filament bundle assembly	cytoplasm; filopodium
Gabra5		AGCCCTGGAAGCAGCTAAAA	TGGGTCAGCTTTCCAGTTGTAA	22	GEA00044669	Gabra5_44669_i8	NM_176942.4	NM_176942.4	Gabra5	A230018I05Rik	gamma-aminobutyric acid (GABA) A receptor, subunit alpha 5	GABA-A receptor activity|chloride channel activity|extracellular ligand-gated ion channel activity|ion channel activity|receptor activity	associative learning|behavioral fear response|chloride transport|gamma-aminobutyric acid signaling pathway|ion transport|synaptic transmission|transport	cell junction|chloride channel complex|integral to membrane|membrane|plasma membrane|postsynaptic membrane|synapse
Gad1		CCTGAGCGACGAGAAAAGCTA	TAGCCCACCATGGTTGTTCC	22	GEA00031926	Gad1_31926_i15	NM_008077.4	NM_008077.4	Gad1	EP10|GAD25|GAD44|GAD67|Gad-1	glutamic acid decarboxylase 1	carboxy-lyase activity|catalytic activity|glutamate decarboxylase activity|lyase activity|pyridoxal phosphate binding	apoptosis|brain morphogenesis|carboxylic acid metabolic process|cerebellar cortex morphogenesis|in utero embryonic development|limb morphogenesis|metabolic process|multicellular organism growth|neural precursor cell proliferation|neuron migration|neurotransmitter biosynthetic process|olfactory bulb development	axon|clathrin sculpted gamma-aminobutyric acid transport vesicle membrane|cytoplasm|intracellular|mitochondrion|synapse
GFAP		AGAACAACCTGGCTGCGTATA	CAGCGATTCAACCTTTCTCTCC	22/23	GEA00011869	Gfap_11869_i1	NM_010277.3	NM_001131020.1|NM_010277.3	Gfap	AI836096	glial fibrillary acidic protein	protein binding|structural constituent of cytoskeleton|structural molecule activity	intermediate filament-based process|response to wounding	cell part|cytoplasm|intermediate filament|intracellular|membrane fraction
Gli1		CAGAATCGGACCCACTCCAA	GCGAGCTGGGATCTGTGTA	22	GEA00012054	Gli1_12054_i9	NM_010296.2	NM_010296.2	Gli1	Zfp5; Zfp-5; AV235269	GLI-Kruppel family member GLI1	DNA binding; DNA binding; chromatin binding; metal ion binding; microtubule binding; nucleic acid binding; promoter binding; protein binding; sequence-specific enhancer binding RNA polymerase II transcription factor activity; transcription activator activity; transcription activator activity; zinc ion binding	cell differentiation; cerebellar cortex morphogenesis; dorsal/ventral pattern formation; epidermal cell differentiation; lung development; multicellular organismal development; negative regulation of canonical Wnt receptor signaling pathway; notochord regression; osteoblast differentiation; pituitary gland development; positive regulation of DNA replication; positive regulation of cell proliferat…	cilium; cytoplasm; cytoplasm; cytoplasm; cytosol; intracellular; nucleus; nucleus
Gli2		ACCAGGAGGGAAGGTACCATTA	GATGACAGGGCTGCCACTTA	23	GEA00012055	Gli2_12055_i2	NM_001081125.1	NM_001081125.1	Gli2	AW546128	GLI-Kruppel family member GLI2	DNA binding|chromatin binding|promoter binding|sequence-specific DNA binding|sequence-specific DNA binding|sequence-specific DNA binding transcription factor activity|sequence-specific DNA binding transcription factor activity|transcription activator activity|zinc ion binding	anatomical structure development|anatomical structure development|anatomical structure formation involved in morphogenesis|apoptosis|axon guidance|branching morphogenesis of a tube|cell differentiation|cell proliferation|cell proliferation|cellular response to organic cyclic substance|cerebellar cortex morphogenesis|cerebellar cortex morphogenesis|cochlea morphogenesis|developmental growth|dorsal…	cilium|cytoplasm|cytoplasm|membrane fraction|motile primary cilium|nucleus|nucleus
Grb10		TTCCCGGATCAGATGGTCAA	CAGCTGCTGGTGTTCAGAAA	23	GEA00022705	Grb10_22705_i7	NM_010345.4	NM_001177629.1|NM_010345.4	Grb10	Meg1; AI325020; mKIAA0207; 5730571D09Rik	growth factor receptor bound protein 10	SH3/SH2 adaptor activity; insulin receptor binding; phosphotyrosine binding; protein binding; receptor activity	insulin-like growth factor receptor signaling pathway; negative regulation of Wnt receptor signaling pathway; negative regulation of Wnt receptor signaling pathway; negative regulation of glucose import; negative regulation of glycogen biosynthetic process; negative regulation of insulin receptor signaling pathway; negative regulation of phosphorylation; positive regulation of vascular endothelia…	cytoplasm; cytosol
Gstp1		TCTACGCAGCACTGAATCC	CTCGAACTGGGAAGTAGACAA	22	GEA00013207	Gstp1_13207_i0	NM_013541.1	NM_013541.1	Gstp1	GstpiB	glutathione S-transferase, pi 1	glutathione transferase activity; transferase activity	glutathione metabolic process; metabolic process
Hoxb7		TTCCGGATCTACCCCTGGAT	GGTCTGGTAGCGCGTGTA	22	GEA00022573	Hoxb7_22573_i0	NM_010460.2	NM_010460.2	Hoxb7	Hox-2.3|AI325018	homeobox B7	DNA binding|protein binding|sequence-specific DNA binding|sequence-specific DNA binding transcription factor activity|transcription regulator activity	anterior/posterior pattern formation|anterior/posterior pattern formation|embryonic skeletal system morphogenesis|embryonic skeletal system morphogenesis|multicellular organismal development|myeloid cell differentiation|regulation of transcription|regulation of transcription, DNA-dependent|transcription	nucleus
ImpG2		GCTGTGGCAAACCATGTGAA	TCGATCCCAAAACGTCCTGAA	23	GEA00048740	ImpG2_48740_i1	NM_174876.3	NM_174876.3	Impg2	Rsbp|IPM200|PG10.2|Spacrcan	interphotoreceptor matrix proteoglycan 2	heparin binding|hyaluronic acid binding|receptor activity	biological_process	integral to membrane|membrane|proteinaceous extracellular matrix
Inpp5f		CGTGTCTGCTCCCAACAAAA	TCAGCAACTCCTCAAGCAAAC	22	GEA00048741	Inpp5f_48741_i3	NM_178641.5	NM_178641.5	Inpp5f	SAC2; cI-27; AI115354; AW561896; mKIAA0966; 5830435P03Rik	inositol polyphosphate-5-phosphatase F	hydrolase activity; molecular_function; phosphoric ester hydrolase activity	biological_process	cellular_component
Irf1		TACCTGGGTCAGGACTTGGATA	TCAGAGAGACTGCTGCTGAC	23	GEA00012869	Irf1_12869_i5	NM_008390.2	NM_001159396.1|NM_001159393.1|NM_008390.2	Irf1	Irf-1; AU020929	interferon regulatory factor 1	DNA binding; sequence-specific DNA binding; sequence-specific DNA binding transcription factor activity	CD8-positive, alpha-beta T cell differentiation; positive regulation of interleukin-12 biosynthetic process; positive regulation of interleukin-12 biosynthetic process; positive regulation of transcription from RNA polymerase II promoter; positive regulation of transcription, DNA-dependent; regulation of gene expression; regulation of transcription; regulation of transcription, DNA-dependent; tra…	nucleus
Jarid2		AGAAAAGGCAGCATGGGGAA	CCTTAGCCTGGGCATTACCAA	23	GEA00018492	Jarid2_18492_i2	NM_021878.2	NM_021878.2	Jarid2	Jmj; C79929; C79931; jumonji; AI317256; AU045941	jumonji, AT rich interactive domain 2	DNA binding; DNA binding; chromatin binding; histone demethylase activity; protein binding; transcription repressor activity	cell differentiation; chromatin modification; liver development; multicellular organismal development; negative regulation of cell proliferation; negative regulation of histone methylation; negative regulation of transcription from RNA polymerase II promoter; negative regulation of transcription, DNA-dependent; positive regulation of histone H3-K9 methylation; regulation of cell proliferation; re…	ESC/E(Z) complex; histone methyltransferase complex; intracellular; nucleus; nucleus
Kcna1		TATCCCCGATGCTTTCTGGT	TTGCCTCCAATTGTCACAGG	23	GEA00053929	Kcna1_53929_e1	NM_010595.3	NM_010595.3	Kcna1	MBK1|Mk-1|Shak|Kv1.1|mceph|Kca1-1|AI840627|MGC124402	potassium voltage-gated channel, shaker-related subfamily, member 1	delayed rectifier potassium channel activity|ion channel activity|potassium channel activity|voltage-gated ion channel activity|voltage-gated potassium channel activity	ion transmembrane transport|ion transport|potassium ion transmembrane transport|potassium ion transmembrane transport|potassium ion transport|regulation of ion transmembrane transport|regulation of ion transmembrane transport|transmembrane transport|transport	apical plasma membrane|integral to membrane|juxtaparanode region of axon|membrane|voltage-gated potassium channel complex
Kdm5b		ACGTTTGAAGCCACTCTCCA	AACTGTGAACTCGGTGGACAA	24	GEA00022639	Kdm1a_22639_i3	NM_133872.2	NM_133872.2	Kdm1a	Aof2|Kdm1|Lsd1|AA408884|mKIAA0601|D4Ertd478e|1810043O07Rik	lysine (K)-specific demethylase 1A	androgen receptor binding|chromatin binding|flavin adenine dinucleotide binding|histone demethylase activity|histone demethylase activity (H3-K4 specific)|histone demethylase activity (H3-K9 specific)|histone demethylase activity (H3-dimethyl-K4 specific)|ligand-dependent nuclear receptor transcription coactivator activity|oxidoreductase activity|promoter binding|protein binding|sequence-specific…	cell proliferation|chromatin modification|histone H3-K4 demethylation|histone H3-K9 demethylation|histone demethylation|in utero embryonic development|multicellular organismal development|negative regulation of gene-specific transcription from RNA polymerase II promoter|negative regulation of transcription factor activity|negative regulation of transcription from RNA polymerase II promoter|oxidat…	nucleus|nucleus|transcription factor complex
Kit		GTGCCAACCAAGACAGACAA	TTCCATGATGGCAGGAGTCA	22	GEA00011823	Kit_11823_i14	NM_001122733.1	NM_001122733.1|NM_021099.3	Kit	W; Bs; Fdc; Ssm; SCO1; SCO5; SOW3; CD117; c-KIT; Tr-kit; Gsfsco1; Gsfsco5; Gsfsow3	kit oncogene	ATP binding; kinase activity; nucleotide binding; protein binding; protein kinase activity; protein tyrosine kinase activity; receptor activity; stem cell factor receptor activity; transferase activity; transmembrane receptor protein tyrosine kinase activity	cell differentiation; cell proliferation; chemotaxis; cytokine-mediated signaling pathway; developmental pigmentation; epithelial cell proliferation; germ cell development; germ cell migration; germ cell programmed cell death; glycosphingolipid metabolic process; hemopoiesis; intracellular protein kinase cascade; lymphoid progenitor cell differentiation; metabolic process; myeloid leukocyte diffe…	acrosomal vesicle; cell surface; cytoplasm; external side of plasma membrane; external side of plasma membrane; extracellular space; integral to membrane; internal side of plasma membrane; membrane
Klf2		CTAAAGGCGCATCTGCGTAC	TTCCAGCCGCATCCTTCC	23	GEA00013289	Klf2_13289_i1	NM_008452.2	NM_008452.2	Klf2	Lklf	Kruppel-like factor 2 (lung)	DNA binding; metal ion binding; nucleic acid binding; protein binding; sequence-specific DNA binding; sequence-specific DNA binding transcription factor activity; sequence-specific DNA binding transcription factor activity; transcription regulator activity; zinc ion binding	cell morphogenesis; erythrocyte homeostasis; erythrocyte maturation; in utero embryonic development; multicellular organism growth; negative regulation of interleukin-6 production; positive regulation of gene-specific transcription from RNA polymerase II promoter; positive regulation of transcription; positive regulation of transcription; regulation of transcription; transcription; transcription,…	intracellular; nucleus
Klf4		CAGGCTGTGGCAAAACCTATAC	CGTCCCAGTCACAGTGGTAA	23	GEA00013370	Klf4_13370_i3	NM_010637.3	NM_010637.3	Klf4	EZF; Zie; Gklf	Kruppel-like factor 4 (gut)	DNA binding; RNA polymerase II transcription factor activity; double-stranded DNA binding; metal ion binding; nucleic acid binding; phosphoinositide 3-kinase regulator activity; promoter binding; sequence-specific DNA binding; sequence-specific DNA binding; sequence-specific DNA binding transcription factor activity; sequence-specific DNA binding transcription factor activity; transcription repre…	cell differentiation; epidermal cell differentiation; epidermis morphogenesis; negative regulation of ERK1 and ERK2 cascade; negative regulation of cell proliferation; negative regulation of muscle hyperplasia; negative regulation of phosphoinositide 3-kinase cascade; negative regulation of protein kinase B signaling cascade; negative regulation of smooth muscle cell proliferation; negative regul…	chromatin; intracellular; nucleus; nucleus; transcription factor complex
Klf5		TCTGGAGAAGCGACGTATCC	TGAGTCCTCAGGTGAGCTTTTAA	22	GEA00018009	Klf5_18009_i1	NM_009769.4	NM_009769.4	Klf5	CKLF; IKLF; Bteb2; 4930520J07Rik	Kruppel-like factor 5	DNA binding; DNA binding; metal ion binding; nucleic acid binding; protein binding; sequence-specific DNA binding transcription factor activity; sequence-specific DNA binding transcription factor activity; zinc ion binding	angiogenesis; microvillus assembly; positive regulation of transcription; regulation of transcription; regulation of transcription, DNA-dependent; transcription; transcription, DNA-dependent	intracellular; nucleus
Ldhb		CTGTAGTGGGCGTTGGACAA	CCACCAGGGCAAGTTCATCA	23	GEA00043081	Ldhb_43081_i1	NM_008492.2	NM_008492.2	Ldhb	Ldh2; H-Ldh; Ldh-2; AI790582	lactate dehydrogenase B	L-lactate dehydrogenase activity; L-lactate dehydrogenase activity; NAD or NADH binding; binding; catalytic activity; identical protein binding; lactate dehydrogenase activity; oxidoreductase activity; oxidoreductase activity, acting on the CH-OH group of donors, NAD or NADP as acceptor	NAD metabolic process; carbohydrate metabolic process; cellular carbohydrate metabolic process; glycolysis; lactate metabolic process; metabolic process; oxidation-reduction process	cytoplasm; mitochondrion; soluble fraction
Lef1		ACACATCCCGTCAGATGTCA	GGGTAGAAGGTGGGGATTTCA	22	GEA00011767	Lef1_11767_i3	NM_010703.3	NM_010703.3	Lef1	Lef-1|AI451430|3000002B05	lymphoid enhancer binding factor 1	C2H2 zinc finger domain binding|DNA binding|armadillo repeat domain binding|beta-catenin binding|caspase inhibitor activity|chromatin binding|enhancer binding|estrogen receptor activity|estrogen receptor binding|gamma-catenin binding|histone binding|promoter binding|promoter binding|sequence-specific DNA binding|sequence-specific DNA binding transcription factor activity|sequence-specific DNA bin…	B cell proliferation|BMP signaling pathway|T cell receptor V(D)J recombination|Wnt receptor signaling pathway|Wnt receptor signaling pathway|Wnt receptor signaling pathway|Wnt receptor signaling pathway|alpha-beta T cell differentiation|anatomical structure regression|apoptosis involved in morphogenesis|canonical Wnt receptor signaling pathway|cell chemotaxis|cell development|cell differentiation…	cytoplasm|cytoplasm|nucleus|nucleus|protein-DNA complex|transcription factor complex|transcription factor complex
Lgr5		CTCCAACCTCAGCGTCTTCA	ATGTAGGAGACTGGCGGGTA	21	GEA00008792	Lgr5_8792_i0	NM_010195.2	NM_010195.2	Lgr5	FEX|Gpr49	leucine rich repeat containing G protein coupled receptor 5	G-protein coupled receptor activity|protein binding|protein-hormone receptor activity|receptor activity|signal transducer activity	G-protein coupled receptor protein signaling pathway|signal transduction	integral to membrane|membrane|plasma membrane
Lin28b		GCCCCTGCTTAGGAAGTGAA	ATCAGTAAATCCTGCCGTCTCC	rejected	GEA00013240	lin28b_13240_i2	NM_001031772.2	NM_001031772.2	Lin28b	Lin-28.2|2810403D23Rik|D030047M17Rik	lin-28 homolog B (C. elegans)	DNA binding|RNA binding|metal ion binding|nucleic acid binding|zinc ion binding	RNA 3'-end processing|gene silencing by RNA|miRNA catabolic process|pre-microRNA processing|regulation of transcription, DNA-dependent	cellular_component|cytoplasm|nucleus
Lrrc2		CTGGTTGTCAGTGGGGATCA	GGGATTGTCCACAAGGCTTAC	21	GEA00044069	Lrrc2_44069_i6	NM_028838.2	NM_028838.2	Lrrc2	2400002D05Rik; 4933431K03Rik	leucine rich repeat containing 2	molecular_function	biological_process	cellular_component
Mpp3		CTAGAGGCCATTCAGGCTGTTA	AGGGGTCCTCAGGTGTCTTA	22	GEA00048546	Mpp3_48546_i16	NM_007863.2	NM_007863.2	Mpp3	Dlgh3|6430514B01	membrane protein, palmitoylated 3 (MAGUK p55 subfamily member 3)	PDZ domain binding|kinase activity|protein binding		cell surface
Musashi		GCCATGCTGATGTTCGACAA	CTACGATGTCCTCGCTCTCAA	22	GEA00047393	Musashi_47393_i6	NM_008629.1	NM_008629.1	Msi1	Msi1h|Musahi1|m-Msi-1	Musashi homolog 1(Drosophila)	RNA binding|nucleic acid binding|nucleotide binding|poly(U) RNA binding|single-stranded RNA binding	response to hormone stimulus	cytoplasm|nucleus|polysome
Myc		AGTGCTGCATGAGGAGACA	TCTCCACAGACACCACATCAA	23	GEA00011771	Myc_11771_i1	NM_010849.4	NM_001177354.1|NM_001177353.1|NM_001177352.1|NM_010849.4	Myc	Myc2; Nird; Niard; bHLHe39; AU016757	myelocytomatosis oncogene	DNA binding; DNA binding; E-box binding; double-stranded DNA binding; protein binding; protein heterodimerization activity; sequence-specific DNA binding; sequence-specific DNA binding transcription factor activity; transcription activator activity; transcription regulator activity	B cell apoptosis; DNA fragmentation involved in apoptotic nuclear change; activation of caspase activity; activation of pro-apoptotic gene products; activation of pro-apoptotic gene products; branching involved in ureteric bud morphogenesis; cellular response to protein stimulus; detection of mechanical stimulus involved in sensory perception of sound; glucose metabolic process; induction of apop…	axon; cytoplasm; nuclear body; nucleolus; nucleoplasm; nucleus; nucleus; spindle
Mycl1		GGCGAGCCCAAGACTCA	CCAGAGATCGCCTCTTCTCC	22	GEA00012894	Mycl1_12894_i0	NM_008506.2	NM_008506.2	Mycl1	L-myc; Lmyc1; Lmyc-1; bHLHe38; AW536278; MGC102165	v-myc myelocytomatosis viral oncogene homolog 1, lung carcinoma derived (avian)	DNA binding; protein binding; sequence-specific DNA binding transcription factor activity; transcription regulator activity	regulation of transcription; regulation of transcription, DNA-dependent	nucleus
MYCN		AGTACCTCCGGAGAGGACAC	AGTGACCACGTCGATTTCTTCC	26	GEA00053928	MYCN_53928_i1	NM_005378.4	NM_005378.4	MYCN	NMYC|ODED|MODED|N-myc|bHLHe37	v-myc myelocytomatosis viral related oncogene, neuroblastoma derived (avian)	DNA binding|protein binding|sequence-specific DNA binding transcription factor activity|transcription regulator activity	regulation of transcription from RNA polymerase II promoter	chromatin|nucleus
Nanog		TATCGCCTTGAGCCGTTGG	GCAGCCTTCCCACAGAAAGA	19	GEA00051980	Nanog_51980_e0	NM_028016.2	NM_028016.2	Nanog	ENK; ecat4; 2410002E02Rik	Nanog homeobox	DNA binding; DNA binding; protein binding; sequence-specific DNA binding; sequence-specific DNA binding transcription factor activity; transcription regulator activity	cell proliferation; embryo development; mesodermal cell fate commitment; multicellular organismal development; negative regulation of BMP signaling pathway; negative regulation of cell fate commitment; negative regulation of cell fate commitment; negative regulation of endodermal cell fate specification; negative regulation of transcription from RNA polymerase II promoter; positive regulation of …	nucleus; nucleus
NeuroD1	Neurod1	CCAGGGTTATGAGATCGTCAC	TCGTCCTGAGAACTGAGACA	23	GEA00011875	Neurod1_11875_i0	NM_010894.2	NM_010894.2	Neurod1	BETA2|BHF-1|Neurod|bHLHa3	neurogenic differentiation 1	DNA binding|RNA polymerase II transcription factor activity|double-stranded DNA binding|protein binding|protein heterodimerization activity|protein heterodimerization activity|sequence-specific DNA binding|sequence-specific DNA binding transcription factor activity|transcription activator activity|transcription factor binding|transcription regulator activity	anterior/posterior pattern formation|camera-type eye development|cell differentiation|cell fate commitment|dentate gyrus development|embryonic organ morphogenesis|endocrine pancreas development|glucose homeostasis|hindbrain development|insulin secretion|multicellular organismal development|negative regulation of apoptosis|nervous system development|nitric oxide mediated signal transduction|pancre…	cytoplasm|intracellular part|nucleus|nucleus
NeuroD2	Neurod2	CCTCCCCTCTCCCCTTGAC	CCGGGCTCGCTGAACA	23	GEA00036143	Neurod2_36143_i0	NM_010895.3	NM_010895.3	Neurod2	Ndrf|bHLHa1	neurogenic differentiation 2	DNA binding|transcription regulator activity	associative learning|behavioral fear response|cell differentiation|multicellular organismal development|nervous system development|neuron development|regulation of transcription|transcription	nucleus
Nodal		TCATCCTACCAACCATGCCTAC	CACAGCACGTGGAAGGAAC	rejected	GEA00011880	Nodal_11880_i1	NM_013611.4	NM_013611.4	Nodal	Tg.413d	nodal	cytokine activity; growth factor activity	SMAD protein signal transduction; anatomical structure formation involved in morphogenesis; anterior/posterior axis specification; anterior/posterior pattern formation; anterior/posterior pattern formation; brain development; cell fate commitment; cell migration; cell migration involved in gastrulation; determination of left/right symmetry; determination of left/right symmetry; determination of l…	extracellular region; extracellular space
Notch3		CCATGCCGATGTCAATGCA	TAGCCTCCACGTTGTTCACA	22	GEA00012083	Notch3_12083_i30	NM_008716.2	NM_008716.2	Notch3	AW229011	Notch gene homolog 3 (Drosophila)	calcium ion binding; protein binding; receptor activity	Notch signaling pathway; Notch signaling pathway; cell differentiation; forebrain development; multicellular organismal development; negative regulation of cell differentiation; negative regulation of neuron differentiation; neuron fate commitment; regulation of developmental process; regulation of transcription; regulation of transcription, DNA-dependent; transcription	integral to membrane; integral to plasma membrane; membrane; nucleus; plasma membrane
Npr3		ACTAGGTGCTGGCTTGCTAA	CTTGCTGATTTCGCCTCTCAA	21	GEA00043160	Npr3_43160_i6	NM_001039181.1	NM_001039181.1|NM_008728.2	Npr3	lgj|stri|NPR-C|C81222|B430320C24Rik	natriuretic peptide receptor 3	hormone binding|natriuretic peptide receptor activity|peptide hormone binding|peptide receptor activity, G-protein coupled|protein homodimerization activity|receptor activity	G-protein coupled receptor protein signaling pathway|activation of phospholipase C activity by G-protein coupled receptor protein signaling pathway coupled to IP3 second messenger|diuresis|inhibition of adenylate cyclase activity by G-protein signaling pathway|negative regulation of adenylate cyclase activity|osteoclast proliferation|regulation of blood pressure|regulation of blood pressure|regul…	integral to membrane|membrane|membrane fraction
Nr0b1		CAAGTGCTGGAGTCTGAACA	TCTCCACTGAAGACCCTCAA	rejected	GEA00017990	Nr0b1_17990_i0	NM_007430.4	NM_007430.4	Nr0b1	AHX; Ahc; Ahch; Dax1; DAX-1	nuclear receptor subfamily 0, group B, member 1	AF-2 domain binding; DNA binding; DNA hairpin binding; RNA binding; RNA binding; basal transcription repressor activity; double-stranded DNA binding; ligand-dependent nuclear receptor activity; ligand-regulated transcription factor activity; protein binding; protein domain specific binding; protein homodimerization activity; receptor activity; sequence-specific DNA binding; sequence-specific DNA …	Leydig cell differentiation; Sertoli cell differentiation; adrenal gland development; adrenal gland development; cell differentiation; gonad development; male gonad development; male gonad development; male sex determination; male sex determination; negative regulation of cell differentiation; negative regulation of steroid hormone receptor signaling pathway; negative regulation of transcription;…	cytoplasm; cytoplasm; insoluble fraction; membrane fraction; nucleus; nucleus; polysomal ribosome; polysomal ribosome
Nr5a2		GGTCTCCTCACGTGCGAAA	TGGTTCTCTATGCACGTGTACC	22	GEA00011827	Nr5a2_11827_i3	NM_001159769.2	NM_001159769.2|NM_030676.3	Nr5a2	Ftf; LRH-1; AU020803; D1Ertd308e	nuclear receptor subfamily 5, group A, member 2	DNA binding; ligand-dependent nuclear receptor activity; lipid binding; metal ion binding; promoter binding; receptor activity; sequence-specific DNA binding; sequence-specific DNA binding transcription factor activity; steroid hormone receptor activity; transcription activator activity; zinc ion binding	bile acid metabolic process; cholesterol homeostasis; positive regulation of transcription; positive regulation of transcription from RNA polymerase II promoter; positive regulation of viral genome replication; regulation of cell proliferation; regulation of transcription; regulation of transcription, DNA-dependent; transcription; transcription, DNA-dependent	cytoplasm; nucleus
Olig2		GCAGCGAGCACCTCAAATCTA	ATGGCCCCAGGGATGATCTAA	22	GEA00011885	Olig2_11885_i0	NM_016967.2	NM_016967.2	Olig2	RK17|Olg-2|Bhlhb1|Oligo2|bHLHe19|AI604895	oligodendrocyte transcription factor 2	DNA binding|protein binding|protein homodimerization activity|sequence-specific DNA binding transcription factor activity|sequence-specific DNA binding transcription factor activity|sequence-specific enhancer binding RNA polymerase II transcription factor activity|transcription regulator activity	multicellular organismal development|myelination|negative regulation of neuron differentiation|negative regulation of transcription from RNA polymerase II promoter|nervous system development|neuron fate commitment|oligodendrocyte differentiation|positive regulation of oligodendrocyte differentiation|regulation of transcription|regulation of transcription, DNA-dependent|regulation of transcription…	cytoplasm|cytoplasm|nucleus|nucleus|plasma membrane|transcription factor complex
Otx2		GTATGGACTTGCTGCATCCC	TCGAGCTGTGCCCTAGTAAA	23	GEA00018002	Otx2_18002_i0	NM_144841.3	NM_144841.3	Otx2	E130306E05Rik	orthodenticle homolog 2 (Drosophila)	DNA binding; protein binding; protein heterodimerization activity; sequence-specific DNA binding; sequence-specific DNA binding transcription factor activity; transcription regulator activity	anatomical structure development; anterior/posterior pattern formation; anterior/posterior pattern formation; axon guidance; cell differentiation; cell fate commitment; cell fate specification; central nervous system development; dorsal/ventral pattern formation; endoderm development; eye photoreceptor cell fate commitment; forebrain development; forebrain development; inner ear morphogenesis; mi…	cytoplasm; growth cone; nucleus; nucleus
Pabpc1		TACGCGTACGTGAACTTCCA	CGTACTGGCTTGCCCTTTATAAC	21	GEA00047424	Pabpc1_47424_i0	NM_008774.3	NM_008774.3	Pabpc1	PABP; ePAB; Pabp1; PabpI; Pabpl1	poly(A) binding protein, cytoplasmic 1	RNA binding; mRNA binding; nucleic acid binding; nucleotide binding; poly(A) RNA binding; protein C-terminus binding	RNA splicing; mRNA processing	cytoplasm; cytosol; nucleus; ribonucleoprotein complex; spliceosomal complex
Pax6		TATCCCGGGACTTCAGTACCA	TGATGGAGTTGGTGTTCTCTCC	23	GEA00011882	Pax6_11882_i6	NM_013627.4	NM_001244202.1|NM_001244201.1|NM_013627.5|NM_001244200.1|NM_001244198.1	Pax6	Dey|Sey|AEY11|Pax-6|Gsfaey11|1500038E17Rik	paired box gene 6	AT DNA binding|DNA binding|HMG box domain binding|R-SMAD binding|R-SMAD binding|RNA polymerase II core promoter sequence-specific DNA binding|RNA polymerase II core promoter sequence-specific DNA binding|co-SMAD binding|double-stranded DNA binding|protein binding|sequence-specific DNA binding|sequence-specific DNA binding RNA polymerase II transcription factor activity|sequence-specific DNA bindi…	anterior/posterior pattern specification|anterior/posterior pattern specification|astrocyte differentiation|axon guidance|axonogenesis|blood vessel development|brain development|brain development|camera-type eye development|camera-type eye development|cell differentiation|cell fate commitment|cell fate commitment|cell fate determination|cerebral cortex regionalization|commitment of neuronal cell …	cytoplasm|intracellular|intracellular part|nuclear chromatin|nuclear chromatin|nucleus|nucleus|transcription factor complex
Pdgfa		TGTAACACCAGCAGCGTCAA	GGCTTCTTCCTGACATACTCCA	22	GEA00012905	Pdgfa_12905_i3	NM_008808.3	NM_008808.3	Pdgfa		platelet derived growth factor, alpha	cell surface binding; collagen binding; growth factor activity; platelet-derived growth factor binding; platelet-derived growth factor receptor binding; protein heterodimerization activity; protein homodimerization activity	actin cytoskeleton organization; angiogenesis; cell projection assembly; hair follicle development; lung alveolus development; negative chemotaxis; negative regulation of phosphatidylinositol biosynthetic process; negative regulation of platelet activation; organ morphogenesis; organ morphogenesis; platelet-derived growth factor receptor signaling pathway; positive regulation of DNA replication; …	cell surface; extracellular region; extracellular space; extracellular space; membrane; microvillus
Peg3		GAGACCGCTGGCCATACA	TGTGGTCTTGACATCACAGGAA	23	GEA00044156	Peg3_44156_i4	NM_008817.2	NM_008817.2	Peg3	Pw1; End4; Gcap4; Zfp102; AL022617; mKIAA0287	paternally expressed 3	metal ion binding; nucleic acid binding; zinc ion binding	apoptosis	cytoplasm; intracellular; nucleus
Pgk1		GCATTCTGCACGCTTCAAAAG	CAACACCGTGAGGTCGAAAG	23	GEA00011623	Pgk1_11623_e0	NM_008828.2	NM_008828.2	Pgk1	Pgk-1; MGC118097	phosphoglycerate kinase 1	ADP binding; ATP binding; kinase activity; nucleotide binding; phosphoglycerate kinase activity; phosphoglycerate kinase activity; transferase activity	carbohydrate metabolic process; gluconeogenesis; glycolysis; phosphorylation	cytoplasm; cytosol; soluble fraction
Phosducin		AGAAGCCGCCAGCCAAA	TTGCTGGGTGGAATTGAATCAC	23	GEA00038369	Phosducin_38369_i1	NM_001159730.1	NM_001159730.1|NM_024458.2	Pdc	Rpr1|Rpr-1	phosducin		response to stimulus|visual perception	actin cytoskeleton|cell projection|cilium|cytoplasm|cytosol|nucleus|photoreceptor outer segment
Pitx2		CATGTCCACTCGCGAAGAAA	CCGGCGATTCTTGAACCAA	23	GEA00013379	Pitx2_13379_i3	NM_011098.3	NM_001042504.1|NM_001042502.1|NM_011098.3	Pitx2	Brx1; Ptx2; Rieg; Brx1a; Brx1b; Otlx2; Munc30; Pitx2a; Pitx2b; Pitx2c; solurshin; Pitx2cbeta; 9430085M16Rik	paired-like homeodomain transcription factor 2	DNA binding; chromatin binding; protein binding; sequence-specific DNA binding; sequence-specific DNA binding transcription factor activity; sequence-specific DNA binding transcription factor activity; transcription factor binding; transcription regulator activity	Wnt receptor signaling pathway; anatomical structure morphogenesis; atrial cardiac muscle tissue morphogenesis; cardiac muscle cell differentiation; determination of left/right symmetry; digestive system development; embryonic camera-type eye development; embryonic hindlimb morphogenesis; extraocular skeletal muscle development; heart development; heart development; in utero embryonic development…	nucleus; transcription factor complex; transcription factor complex
Pml		ATCCTCCTGCCCAACAACAA	TGAGCTGCTGATCACCACAA	23	GEA00012913	Pml_12913_i4	NM_008884.5	NM_008884.5|NM_178087.4	Pml	Trim19; AI661194; 1200009E24Rik	promyelocytic leukemia	DNA binding; SMAD binding; cobalt ion binding; metal ion binding; protein binding; protein heterodimerization activity; protein homodimerization activity; transcription coactivator activity; transcription coactivator activity; transcription regulator activity; transcription repressor activity; ubiquitin protein ligase binding; zinc ion binding	DNA damage response, signal transduction by p53 class mediator resulting in cell cycle arrest; DNA damage response, signal transduction by p53 class mediator resulting in induction of apoptosis; DNA damage response, signal transduction resulting in induction of apoptosis; DNA damage response, signal transduction resulting in induction of apoptosis; PML body organization; PML body organization; SM…	PML body; PML body; cytoplasm; insoluble fraction; intracellular; nuclear matrix; nuclear matrix; nuclear membrane; nucleolus; nucleoplasm; nucleus; nucleus
Pou5f1/Oct4		TCCCTACAGCAGATCACTCAC	CGCCGGTTACAGAACCATAC	22	GEA00011881	Pou5f1_11881_i3	NM_013633.2	NM_013633.2	Pou5f1	Oct3; Oct4; Otf3; Otf4; Oct-3; Oct-4; Otf-3; Otf-4; Otf3g; Oct3/4; Oct-3/4; Otf3-rs7	POU domain, class 5, transcription factor 1	DNA binding; DNA binding; DNA binding; chromatin binding; miRNA binding; promoter binding; promoter binding; protein binding; sequence-specific DNA binding; sequence-specific DNA binding; sequence-specific DNA binding transcription factor activity; sequence-specific DNA binding transcription factor activity; transcription corepressor activity; transcription factor binding; transcription factor bi…	BMP signaling pathway involved in heart induction; cardiac cell fate specification; cell fate commitment; cell fate commitment involved in formation of primary germ layers; ectodermal cell fate commitment; endodermal cell fate commitment; germ-line stem cell maintenance; mesodermal cell fate commitment; negative regulation of calcium ion-dependent exocytosis; negative regulation of cell different…	cytoplasm; cytoplasm; cytosol; nucleus; nucleus; nucleus; transcription factor complex; transcription factor complex; transcriptional repressor complex
Ptch	Ptch1	TGCTGGAGGAGAACAAGCAA	CCAGTCACTGTCAAATGCATCC	22.5	GEA00013176	Ptch1_13176_i14	NM_008957.2	NM_008957.2	Ptch1	Ptc|mes|Ptc1|Ptch|A230106A15Rik	patched homolog 1	cholesterol binding|hedgehog receptor activity|heparin binding|patched binding|protein binding|receptor activity|zinc ion binding	dorsal/ventral neural tube patterning|dorsal/ventral pattern formation|embryonic limb morphogenesis|embryonic limb morphogenesis|epidermis development|glucose homeostasis|heart morphogenesis|hindlimb morphogenesis|keratinocyte proliferation|mammary gland development|mammary gland duct morphogenesis|mammary gland epithelial cell differentiation|negative regulation of epithelial cell proliferation|…	extracellular region|integral to membrane|integral to plasma membrane|membrane|plasma membrane
Rac3		AACGCCTTCCCAGGAGAATA	GGTTAACTGGCTTCCCATCC	22	GEA00022635	Rac3_22635_i1	NM_133223.4	NM_133223.4	Rac3	Rac1B	RAS-related C3 botulinum substrate 3	GTP binding; GTPase activity; nucleotide binding; protein binding	actin cytoskeleton organization; cell projection assembly; neuromuscular process; neuromuscular process controlling balance; neuron projection development; small GTPase mediated signal transduction	cell projection; cytoplasm; endomembrane system; filamentous actin; growth cone; intracellular; membrane; neuron projection; neuronal cell body
Rest		AGACTCATCTAACGCGACACA	TCGGGTCACTTCATGCTGATTA	22	GEA00011962	Rest_11962_i2	NM_011263.2	NM_011263.2	Rest	NRSF; AA407358; MGC150099; 2610008J04Rik	RE1-silencing transcription factor	DNA binding; DNA binding; chromatin binding; metal ion binding; nucleic acid binding; protein binding; protein complex binding; transcription repressor activity; zinc ion binding	negative regulation of neuron differentiation; negative regulation of transcription; negative regulation of transcription, DNA-dependent; regulation of transcription; transcription	chromatin; cytoplasm; intracellular; nucleus; protein complex; transcriptional repressor complex
Retinal S antigen	Sag	CTATTACGTCAAGCCTGTAGCC	GCACCAGTGTCTTGGTCAAA	22	GEA00047813	Sag_47813_i9	NM_009118.2	NM_009118.2	Sag	Arr1|Irbp|arrestin|A930001K18Rik	retinal S-antigen	opsin binding|phosphoprotein binding	response to stimulus|sensory perception|signal transduction|visual perception
Runx2		TCTGGCCTTCCTCTCTCAGTA	AACTGCCTGGGGTCTGAAAA	24	GEA00011825	Runx2_11825_i7	NM_001146038.1	NM_001145920.1|NM_009820.4|NM_001146038.1	Runx2	Cbf; LS3; AML3; Osf2; Cbfa1; Cbfa-1; PEBP2aA; Pebp2a1; Pebpa2a	runt related transcription factor 2	ATP binding; DNA binding; DNA binding; chromatin binding; promoter binding; protein binding; repressing transcription factor binding; sequence-specific DNA binding transcription factor activity; sequence-specific DNA binding transcription factor activity; specific transcriptional repressor activity; transcription activator activity; transcription factor binding	cell maturation; cell maturation; chondrocyte development; chondrocyte differentiation; endochondral ossification; negative regulation of smoothened signaling pathway; negative regulation of transcription; negative regulation of transcription; odontogenesis of dentine-containing tooth; osteoblast differentiation; osteoblast differentiation; osteoblast fate commitment; positive regulation of cell …	cytoplasm; nucleus; nucleus; transcription factor complex
S100b		ACAACGAGCTCTCTCACTTCC	ATCTTCGTCCAGCGTCTCC	21	GEA00012109	S100b_12109_i1	NM_009115.3	NM_009115.3	S100b	Bpb|AI850290|MGC74317	S100 protein, beta polypeptide, neural	RAGE receptor binding|S100 beta binding|calcium ion binding|calcium-dependent protein binding|identical protein binding|metal ion binding|protein homodimerization activity|receptor binding	cellular calcium ion homeostasis|energy reserve metabolic process|induction of apoptosis|learning or memory|memory|positive regulation of I-kappaB kinase/NF-kappaB cascade|regulation of cytokine biosynthetic process|regulation of long-term neuronal synaptic plasticity|regulation of neuronal synaptic plasticity	cytoplasm|cytoplasm|extracellular region|neuronal cell body|nucleus|nucleus|perinuclear region of cytoplasm|ruffle
Sall1		GAAGCCCTTTGCTTGCACTA	AGGGGTGCTGTTCCACATA	22	GEA00017911	Sall1_17911_i2	NM_021390.3	NM_021390.3	Sall1	Msal-3	sal-like 1 (Drosophila)	DNA binding; beta-catenin binding; metal ion binding; nucleic acid binding; transcription activator activity; transcription repressor activity; zinc ion binding	embryonic digestive tract development; embryonic digit morphogenesis; heart development; inductive cell-cell signaling; kidney development; limb development; negative regulation of transcription from RNA polymerase II promoter; olfactory bulb mitral cell layer development; outer ear morphogenesis; positive regulation of Wnt receptor signaling pathway; positive regulation of transcription from RNA…	chromocenter; cytoplasm; heterochromatin; intracellular; nucleus; nucleus
Sfrp1		AGTTGAAGTCAGAGGCCATCA	TGTCACCGTTTTCCTTCTTCAC	24	GEA00009414	Sfrp1_9414_i1	NM_013834.3	NM_013834.3	Sfrp1	sFRP-1|AW011917|AW107218|AW742929|2210415K03Rik	secreted frizzled-related protein 1	Wnt-protein binding|Wnt-protein binding|cysteine-type endopeptidase activity|drug binding|frizzled binding|heparin binding|identical protein binding|protein binding|specific transcriptional repressor activity|transcription activator activity|transcription repressor activity	DNA fragmentation involved in apoptotic nuclear change|Wnt receptor signaling pathway|Wnt receptor signaling pathway involved in somitogenesis|Wnt receptor signaling pathway, planar cell polarity pathway|actin cytoskeleton organization|anterior/posterior pattern formation|bone trabecula formation|canonical Wnt receptor signaling pathway|cell differentiation|cellular response to X-ray|cellular res…	cell surface|cytosol|extracellular matrix|extracellular region|extracellular space|intracellular|plasma membrane|proteinaceous extracellular matrix
Sox2		TGAAGGAGCACCCGGATTATA	CGGGAAGCGTGTACTTATCC	23	GEA00011879	Sox2_11879_e0	NM_011443.3	NM_011443.3	Sox2	lcc; ysb; Sox-2	SRY-box containing gene 2	DNA binding; DNA binding; DNA binding; chromatin binding; miRNA binding; promoter binding; protein binding; sequence-specific DNA binding; sequence-specific DNA binding transcription factor activity; sequence-specific DNA binding transcription factor activity	adenohypophysis development; anatomical structure formation involved in morphogenesis; cell cycle arrest; cell fate commitment; cell fate specification; cerebral cortex development; detection of mechanical stimulus involved in equilibrioception; detection of mechanical stimulus involved in sensory perception of sound; diencephalon morphogenesis; embryonic organ development; epithelial tube branch…	cytoplasm; cytoplasm; cytosol; nucleus; nucleus; nucleus; transcription factor complex
Sox9		AGTACCCGCATCTGCACAA	GTCTCTTCTCGCTCTCGTTCA	23	GEA00037224	Sox9_37224_i0	NM_011448.4	NM_011448.4	Sox9	AV220920|KIAA4243|mKIAA4243|2010306G03Rik	SRY-box containing gene 9	DNA binding|promoter binding|protein binding|sequence-specific DNA binding|sequence-specific DNA binding transcription factor activity|sequence-specific DNA binding transcription factor activity|transcription activator activity	Sertoli cell development|Sertoli cell differentiation|cartilage condensation|cartilage development|cell differentiation|cell fate commitment|cell fate specification|cellular response to retinoic acid|endochondral bone morphogenesis|epithelial cell proliferation involved in prostatic bud elongation|epithelial to mesenchymal transition|hair follicle development|heart development|intestinal epitheli…	nucleus|nucleus
T		ATGCTGCCTGTGAGTCATAAC	GGTACCATTGCTCACAGACC	23	GEA00011853	T_11853_i6	NM_009309.2	NM_009309.2	T	Lr|T1|Bra|Low|Tl2|Tl3|cou|me75|D17Mit170	brachyury	DNA binding|protein binding|sequence-specific DNA binding|sequence-specific DNA binding transcription factor activity	SMAD protein signal transduction|anatomical structure morphogenesis|anterior/posterior pattern formation|multicellular organismal development|neural plate morphogenesis|neural tube closure|notochord development|positive regulation of cell proliferation|positive regulation of transcription from RNA polymerase II promoter|regulation of transcription|regulation of transcription, DNA-dependent|reprod…	cytoplasm|nucleus
Tbp		ACCAGAACAACAGCCTTCCA	AAAGATGGGAATTCCAGGAGTCA	22	GEA00003741	Tbp_3741_i1	NM_013684.3	NM_013684.3	Tbp	Gtf2d; SCA17; TFIID; GTF2D1	TATA box binding protein	DNA binding; RNA polymerase II transcription factor activity; binding; promoter binding; protein binding; repressing transcription factor binding; sequence-specific DNA binding transcription factor activity; transcription factor binding	general transcription from RNA polymerase II promoter; positive regulation of transcription; regulation of transcription; regulation of transcription, DNA-dependent; transcription; transcription elongation from RNA polymerase II promoter; transcription from RNA polymerase II promoter; transcription from RNA polymerase III promoter; transcription from RNA polymerase III promoter; transcription ini…	RNA polymerase I transcription factor complex; cytoplasm; female pronucleus; male pronucleus; nucleoplasm; nucleus; nucleus; pronucleus; transcription factor TFIIA complex; transcription factor TFIID complex
Tbx3		AGTTTCACAAGCGGGGTACA	CAGTCCAGAGCACCTCACTTTA	22	GEA00018044	Tbx3_18044_i0	NM_198052.1	NM_198052.1|NM_011535.2	Tbx3	D5Ertd189e	T-box 3	DNA binding; general transcriptional repressor activity; sequence-specific DNA binding; sequence-specific DNA binding transcription factor activity; transcription repressor activity; transcription repressor activity	anterior/posterior axis specification, embryo; anti-apoptosis; blood vessel development; branching involved in mammary gland duct morphogenesis; cardiac muscle cell differentiation; cell aging; cell aging; embryonic arm morphogenesis; embryonic digit morphogenesis; female genitalia development; follicle-stimulating hormone secretion; forelimb morphogenesis; heart looping; heart morphogenesis; in …	nucleus; nucleus
Tcl1		CGAAGCTGCGACTCCATGTA	AGTTCAAGCAACATGTCCTCCA	24	GEA00022672	Tcl1_22672_i1	NM_009337.3	NM_009337.3	Tcl1	Tcl1a	T-cell lymphoma breakpoint 1		stem cell maintenance	cell cortex; cytoplasm; endoplasmic reticulum; microsome; nucleus; pronucleus
Trip10		TCTTCCCAAGAGACCTACCAAA	TCCTGGAGAAGCTGGACAAA	23	GEA00050977	Trip10_50977_i2	NM_134125.3	NM_134125.3	Trip10	Cip4|AI646975	thyroid hormone receptor interactor 10	identical protein binding|lipid binding|protein binding	endocytosis|hyperosmotic salinity response	Golgi apparatus|cell projection|cytoplasm|cytoskeleton|lysosome|membrane|microtubule|plasma membrane
Tuj1	Tubb3	GCGCATCAGCGTATACTACA	AGGTTCCAAGTCCACCAGAA	24	GEA00031908	Tubb3_31908_i1	NM_023279.2	NM_023279.2	Tubb3	M(beta)3|M(beta)6|3200002H15Rik	tubulin, beta 3	GTP binding|GTPase activity|nucleotide binding|peptide binding|structural molecule activity	GTP catabolic process|axon guidance|axon guidance|microtubule-based movement|microtubule-based process|mitosis|neuron differentiation|protein polymerization	axon|cytoplasm|intracellular|microtubule|microtubule cytoskeleton|protein complex
Whsc2		CCCTGTTCAGCAGCAACCTA	AACATCTCCTGGGCAGCAAA	22	GEA00045735	Whsc2_45735_i8	NM_011914.2	NM_011914.2	Whsc2	NELFA; Whsc2h	Wolf-Hirschhorn syndrome candidate 2 (human)	molecular_function	biological_process; regulation of transcription; transcription	nucleoplasm; nucleus
Wif1		AGTGTCCGGATGGGTTCTAC	CACACAGACCACCGTTCATAC	23	GEA00009972	Wif1_9972_i4	NM_011915.2	NM_011915.2	Wif1	WIF-1|AW107799	Wnt inhibitory factor 1	Wnt-protein binding|protein tyrosine kinase activity	Wnt receptor signaling pathway|multicellular organismal development|negative regulation of Wnt receptor signaling pathway|positive regulation of fat cell differentiation	extracellular region
Zfx		GCTGTTAACGACTCTCAGCAA	CTCCTCTCCAACAATCACTTCC	23	GEA00044419	Zfx_44419_i5	NM_001044386.1	NM_001044386.1|NM_011768.2	Zfx	Zfx5; Zfx6; Zfx5,6	zinc finger protein X-linked		behavior; death; embryo development; fertilization; germ cell development; homeostasis of number of cells; multicellular organism growth; oocyte development; ovarian follicle development; post-embryonic development; spermatogenesis	nucleus
*The threshold of reliable Cq values for each primer were determined as described in supporting information. Although we used primers that achieved linear amplifcation in primer validation test (only one primer set was used) described in our previous paper (Jasnos and Sawado, 2014 Nature Protocols), we occasionally failed to detect signals and thus were unable to determine the threshold of reliab…
