# Supplementary material for: Molecular and In Vivo Characterization of Cancer-Propagating Cells Derived from MYCN-Dependent Medulloblastoma
Source: PLoS One. 2015 Mar 18;10(3):e0119834. doi: 10.1371/journal.pone.0119834 (PMC4365014; doi:10.1371/journal.pone.0119834)
Supplement: S3 Table — (XLSX) [file pone.0119834.s014.xlsx]

## Sheet: WT1
cell	Acta1	Actb	Aldh2	Atf4	Atoh1	Atrx	Bcor	beta-catenin	Bmi1	Btg2	Ccne1	CD133	Cd15	CDH18	Cdkn1a	Crabp1	CyclinD1	Dkk2	Dppa3	Dyrk2	E2F1	E2F2(2)	Emx2	Eomes(2)	Esrrb	Fgf4	Fgf8	Foxd3	Foxp3	Fscn1	Gabra5	Gad1	Gfap	Gli1	Gli2	Grb10	Gstp1	Hoxb7	ImpG2	Inpp5f	Irf1	Jarid2	Kcna1	Kdm5b	Kit	Klf2	Klf4	Klf5	Ldhb
WT1_1		16.4239		20.7607	20.8537	19.3823		19.7185	18.2856	18.5041							18.9794													19.935		18.8844					19.523			20.8131				22.4061					21.0524
WT1_10		18.1408		20.5345		19.6578		19.7228	19.6533	18.61					18.8257		18.7388													20.547		19.4306					21.759					22.0072		21.7099					19.5003
WT1_11		18.0435		20.9941		20.0081			19.7886	20.4102					20.1985		17.717													21.4804		20.7025	21.9575				20.0427			20.8779				21.0486					19.7883
WT1_12		17.7776		20.9782		19.2648		20.9688	20.2775								18.2006													21.487		21.2216					21.666			21.3527				22.0067	21.0187
WT1_13		15.9483		17.9887		19.337	21.6296	18.0575	18.8172	18.9476					18.6797		15.6359													19.052		18.097					18.4683			19.6762	22.9992			19.7794	21.9366		22.0739		20.128
WT1_14		16.1483		18.8171		18.7627		18.7044	19.7752						20.727		18.5504													20.806		18.6497					19.6611			21.7551				21.9407	21.1646				20.8818
WT1_15		16.7114		17.9744		19.2112	20.9175	19.2504	17.9986	20.0393	20.5785				21.8772							21.7447								19.5845		19.2359					19.329				21.2731				20.8868				21.5062
WT1_16		17.3013		20.2645		19.6322		19.2137	19.9411																					20.6302		18.9481					19.0471			21.709	22.9748								21.375
WT1_17		17.646		20.1198		19.6574		19.9373	18.749						21.2471		18.054													21.6173		19.6235					19.9216				21.233			20.4082	21.7349				20.8239
WT1_18		16.272		19.3309		18.3197		18.8486	18.4899	18.9981					19.1311		15.8634													19.468		18.5453					19.3669			20.6411				20.44			21.3234		20.1867
WT1_19		18.2677		19.0998		20.6205		19.5029	19.4527						20.6878		16.6965													19.7957		19.4233					20.6789			20.8176				20.2594	20.7303				22.9686
WT1_2		16.4952		17.6979		18.7416		18.2954	18.1586								16.6531				20.5341									20.1734		18.4377					19.3869			20.7348	20.9384			22.4123	21.6998		21.5789		20.2859
WT1_20		17.8114		19.5359	21.2063	19.2615	21.8956	19.2175	19.1917	18.7372					18.3956		16.438													19.9398		19.0517					18.8812			19.8886	21.6449			20.8793			21.6943	21.8041	19.082
WT1_21		18.9055		22.0431		20.1171		20.6927	19.9172						19.2997		20.0916													21.5759		20.5309												22.1241					20.7468
WT1_22		16.7147		19.6402		18.4299	20.7598	18.6507	18.9272						21.1631		16.3927													20.1953		18.6024					20.4336			20.8184		22.7548		20.0537			22.2143		19.7616
WT1_23		17.434		20.4459		20.2125		19.6829	18.7481	19.0966					21.4812		19.6363													20.4883		19.6232					19.6045							22.2995					20.1196
WT1_24		17.0146		18.7997		20.3654		20.0059	18.3056		21.9224				19.6771		18.1183													19.887		19.5584					19.8766			20.7536	22.5972			22.2681					20.9655
WT1_25		17.2662		18.9504		19.5251		19.7006	18.2677		21.0674				20.7792		16.9013													20.0703		19.4008					20.2244				21.5451						22.8052		21.6236
WT1_26		16.472		18.1396		19.6175	21.3461	18.5163	17.7723	21.2598					20.3192		15.495													19.7635		18.549					19.0841				21.6582			21.6388					19.7478
WT1_27		16.1704		18.4854		18.3269		18.7925	18.7114	20.4669	21.2324				21.037		16.7581					21.5949								19.5326		18.5149					18.5814			20.7589	21.6055			21.6098			21.5664		19.7195
WT1_28		15.3517		18.5171	20.8965	17.87	20.6475	17.3614	18.0778	19.0972					18.8697		16.9187													19.1715		17.2185					18.6454			19.4402				19.9223	20.4908		20.1558		20.311
WT1_29		20.1575							20.0392						21.5087		18.8038													21.4499		21.2353												23.6246
WT1_3		16.084		18.2927		19.5546	20.9925	18.2715	17.8113	21.9472					19.5411		16.3609													21.058		18.2698					19.1768			20.2545	22.1051	22.9198		22.7137					19.779
WT1_30		17.2779		18.7465		18.7453		19.328	19.6118	18.6248					18.4377		16.204													20.2062		18.7084					19.1364			20.0776				20.2965	21.6549		21.5948		18.8604
WT1_31		17.012		19.4962		20.0311	20.7138	19.2555	19.1962						21.1516		18.5103													20.261		18.8929					19.7295			19.7184				21.366	20.6734				19.8693
WT1_32		16.5573		19.6853	21.8507	18.8867		18.7401	20.0346	19.1029					19.2744		16.5266													20.37		18.949					18.7375			21.8325				22.0056			22.2642		19.8643
WT1_33		17.6319		18.543		19.4572		19.7865	19.6564								18.4844													20.2222		19.688					19.4199				22.2433			21.3032					21.4661
WT1_34		17.3197		19.268		19.5482		20.0882	19.6779		21.6958						20.4675													20.6509		19.425					19.8503					22.6605							20.7953
WT1_35		17.5		20.4952		19.4724		18.6164	18.5226						21.7764		16.9615													19.5514		18.6714					19.4457			20.7479	21.9463			20.8761	18.7363		21.4625		20.2621
WT1_36		16.5982	21.6567	18.9654		18.3492		20.0611	18.7783	18.0404					17.8395		19.2137													21.9986		19.8201					20.9167							20.0985	21.044				19.0466
WT1_37		17.2906		18.4193		18.7002		19.2695	18.3894	20.1109					19.135		18.0142													21.1996		19.1434					19.0751				22.9077			21.0509					19.1746
WT1_38		17.0059		18.3919		19.0983		18.4842	18.4687						20.0614															20.7782		18.3085					20.3353			21.7088				22.4964	21.7029		22.494		22.6366
WT1_39		16.1894	21.744	19.6239		18.8817		18.743	17.8749		20.342				20.6413		16.7834					21.5553								20.3479		18.5982					18.8964							23.5866	20.2987				18.8362
WT1_4		15.611		18.1424		18.3358		18.5121	18.1065	20.7268	20.3914				20.4186		16.9216				20.0195		21.7287							19.7158		18.7191					18.7822			20.5981	21.5684			22.492			21.7681		20.3147
WT1_40		17.8301		19.1459		18.8775		19.6768	19.099	19.4518					20.4475		16.9853													19.8088	20.9179	19.2387					19.6275							21.2649					19.5966
WT1_41		17.3405		19.8142		19.0718		19.4039	19.3307	19.8211					18.9989		18.2682													20.1312		19.2001									22.0163			21.2832					19.2932
WT1_42		20.2128																												24.0224
WT1_43		16.9824		20.2619		20.9589		19.3553	18.6777		19.6479						17.5723				21.8779		22.5762							19.708		19.1285					19.1447			21.5439	21.8688			22.0017					20.1169
WT1_44		16.423		19.0834		19.0541		19.461	18.746						20.4657		17.0065													19.6166		18.9384					20.3527			21.4013	22.0775			21.5709			22.4323		19.9328
WT1_45		16.8703		19.8795		19.0529		19.7013	18.4738						21.1532		17.2356													20.9779		19.0487					20.6024							21.3474	20.86				21.7135
WT1_46		16.4624		18.6864		20.4944		18.7921	18.9212		21.2808						17.3606													20.5204		18.7715					20.0973			20.9683				23.2894	19.7391			21.9266	20.4336
WT1_47		17.4957		20.4797		20.7054		20.2967	20.0106								16.4736													20.2135		19.5456					19.3989			21.0594				22.222					19.9133
WT1_48		17.1292		19.7597		20.9212		19.5164	18.7433	18.2338					21.66		17.745													21.1931		19.4316					19.227				21.9913			21.6283	21.3548		22.8008		20.1357
WT1_5		15.5012	20.988	17.1384		18.5663	20.6507	17.7949	17.5067	20.659	21.5686						16.5363													19.4624		17.7103					18.2902			20.079	21.5429			21.9417	21.7169		21.8252		21.3379
WT1_6		15.5471		17.4205		18.5734		17.7192	16.9936		19.6647				18.7492		15.3249				21.7816	21.5988								18.8657	20.4807	17.3607								20.3607	21.4321			20.6708	20.2929		21.9605	21.8288	19.7175
WT1_7		16.3943		19.7357		18.9627		18.8807	18.4721		21.042				17.7977		16.9204													19.2512		18.7702					19.6986			20.5672				21.701					20.3997
WT1_8		18.0115		20.4947		19.0847		20.3817	19.6819	21.117					21.0306		17.5383													20.608		19.6037					20.1593			21.4344				20.6574					19.8563
WT1_9		16.1038	20.5882	17.4497		18.2453	21.6047	17.6837	18.741		20.2735				21.4606		15.2054				21.8568									18.4293		17.752					18.3624			19.3372	21.0988			22.4297			22.7977	21.566	19.0443
Expressed cells	0	48	4	46	4	46	10	45	47	22	13	0	0	0	37	0	44	0	0	0	5	4	2	0	0	0	0	0	0	48	2	47	1	0	0	0	43	0	0	30	22	4	0	43	19	0	18	4	45
Probability	0	100	8.33333	95.8333	8.33333	95.8333	20.8333	93.75	97.9167	45.8333	27.0833	0	0	0	77.0833	0	91.6667	0	0	0	10.4167	8.33333	4.16667	0	0	0	0	0	0	100	4.16667	97.9167	2.08333	0	0	0	89.5833	0	0	62.5	45.8333	8.33333	0	89.5833	39.5833	0	37.5	8.33333	93.75
[truncated: 47 more columns]

## Sheet: WT2
cell	Acta1	Actb	Aldh2	Atf4	Atoh1	Atrx	Bcor	beta-catenin	Bmi1	Btg2	Ccne1	CD133	Cd15	CDH18	Cdkn1a	Crabp1	CyclinD1	Dkk2	Dppa3	Dyrk2	E2F1	E2F2(2)	Emx2	Eomes(2)	Esrrb	Fgf4	Fgf8	Foxd3	Foxp3	Fscn1	Gabra5	Gad1	Gfap	Gli1	Gli2	Grb10	Gstp1	Hoxb7	ImpG2	Inpp5f	Irf1	Jarid2	Kcna1	Kdm5b	Kit	Klf2	Klf4	Klf5	Ldhb
WT-2_01		17.2645		17.3921		19.7886		18.6598	18.7111						21.5215		17.1901													19.8921							21.5087				20.147			21.9924					20.4231
WT-2_02		16.2075		18.6754		19.6201		18.0636							21.8073		18.1876				21.3409									18.9828							20.1312				22.2857			21.3851			21.2682		20.4076
WT-2_03		18.5113		19.2009					20.3582	19.5805			21.6456																			20.9403					20.5328	20.5328		21.0046	20.869	22.9117		20.4326			22.0896		18.974
WT-2_04		18.677		16.801		18.8972		19.3326	19.8721	19.8555					21.3424																	20.8343		21.7714							22.6359			19.086	21.9718	20.5234	21.7871		19.3545
WT-2_05		17.9023		17.4704	20.863	19.5178		20.1228	19.0646	19.6245					20.2558															19.8734		21.8519		21.1623								22.7882		20.2252			22.2349		19.4821
WT-2_06		14.7849		19.3305	21.7252	18.4984		17.2272	19.0382						19.9256		17.9887													19.8416		21.0485					21.8309			20.9374				19.0545			21.4797		19.1566
WT-2_07		16.9512	20.9893	16.7908		21.052		18.4726	19.0273	20.3917					19.5849		17.138															20.7317					19.5618			20.9199		21.6442		18.3323		21.2484	19.1765		19.1212
WT-2_08		14.422		16.8059		17.982		17.4507	17.7356		21.631						16.5418				21.4446	21.8628								17.8841							17.9875			19.8195				21.1877			21.7727		17.0087
WT-2_09		15.1111		17.4451		17.5103		17.6955	17.9314		20.4982				18.5952		15.1977				20.5592									17.9799							18.4295	21.3277		21.5442				20.2658	20.5264	22.0959	22.642		19.4008
WT-2_10		19.0758		18.5472		19.9501		19.1126	18.4518	18.385					19.8891															20.101		19.3622						21.2437				22.4709		20.3353			21.3522		18.7571
WT-2_11		16.204	20.8933	17.9392	20.9652	18.5039		18.8664	18.93		20.4959						20.3495				21.5038	20.6536								19.6626		20.7113					20.1854												21.4982
WT-2_12		15.0605		17.7688		18.6884		17.2539	17.4497	20.1811	20.1789				20.2318		18.522					21.0369								18.8662		20.3929					19.7702	21.4221								21.4905	21.8644		19.9847
WT-2_13		18.4079		22.3168		19.3451		20.8644	19.8993	20.2716							20.7342													21.7154							20.2412							22.2997					19.5698
WT-2_14		16.6439		19.154	21.604	20.3136		18.2217	19.2868								17.4966													19.5199		20.5245					20.7593			19.8453				20.5518	20.1793				20.6754
WT-2_15		17.3866		16.7271		18.4661		20.1401	19.8787	18.0117					19.4169															21.3954		19.614					20.2719			21.9729	21.254			20.0179			19.1012	21.6456	18.5065
WT-2_16		18.2964		18.4338	20.6228	20.4056		19.4113	18.9061	15.7186					18.7548																	20.0014								21.5229				19.1485	21.9092	20.5846	17.9208		18.9293
WT-2_17		17.3135		17.4746	21.0042	19.8769		19.3786		16.1489			21.1214		17.6071															22.4018		19.8662					21.2551	21.5123				21.7599		18.9625	21.7567	19.9359	21.6558	19.1983	19.917
WT-2_18		17.0545		18.4287		18.2259		18.4145	19.7106								17.5501													19.4434				21.7713			20.8221							20.0082		22.784			20.414
WT-2_19		16.2063	21.6457	19.7434		18.7653		17.6965	19.6846																					19.9782							18.8614			20.6255				20.0834	19.3657				19.9501
WT-2_20		18.1723	20.2289	18.9419		19.1501		20.0488	20.8394	21.248							18.3528										21.8457			20.6736		20.7354					20.5597			21.036	22.3721			20.9132	18.3403				21.3578
WT-2_21		18.1401		19.6132	21.4959	21.1986		20.3917	20.385	20.2613																				21.6043		21.041												18.9293			22.6096		20.7569
WT-2_22		18.3733		17.7687		21.4708		19.3524	18.4734	20.2262					20.6549															20.0978		21.3393					19.8213							21.1525					19.1905
WT-2_23		18.7625		18.9692	21.2936	20.0604		20.064	19.9396	18.247					21.7913															21.174											19.3838			19.6816		22.7048	21.9327		21.7834
WT-2_24		16.6528		21.1372		19.3499		18.7952	19.0617						20.9254		19.8059													19.7045		20.8431					20.232					22.9121		19.8555	21.7535				20.1798
WT-2_25		14.9958		17.4173	19.0761	18.0202	20.2398	16.8163	17.9075	16.4725	21.2724						16.338					21.0976								17.2663		19.9865					18.4902				20.3526			18.5805	19.2659		21.6089		17.6354
WT-2_26		16.3189		16.5882	19.6151	18.6912		18.8736	18.5632	17.0875			21.478		19.4716		16.7073													21.2253		18.9291					18.5403			21.5308	19.808			19.4897			19.3797		18.8436
WT-2_27		16.9232		18.7299	21.0944	19.0136		19.6508	18.2762								18.3038													19.7703		20.6508					21.187				21.1915			22.0597			21.5624		21.3914
WT-2_28		15.33		17.154		18.6623		16.9942	18.1378	19.4209							16.3161													17.949							19.3891			21.4427		22.5261		19.5424	20.7071				19.6905
WT-2_29		15.0765		17.1172	21.9733	17.5907		16.8487	18.8232	18.6731					21.2655		18.115				20.7449	20.4839								17.618		21.271					18.9342			20.8736	19.6076						19.7739		20.3535
WT-2_30		17.4166		17.8603		19.0838			19.4118	17.1944					18.1738															20.2235		19.9509												20.2523			20.1426		20.3172
WT-2_31		16.5097	20.858	20.3272	20.7984	18.8087		19.1483	18.9509	19.6393							20.2203													21.5679		19.3179					19.6672			21.5071	22.2691			20.5987		22.0461	21.5762		19.8463
WT-2_32		16.8568		17.7237		18.1227		18.5671	20.0978	20.6398					19.6729		15.5528			21.544										18.8082		19.019					20.1981							19.8518	20.7409		21.1166		18.5931
WT-2_33		15.6698		16.8012		18.2964		17.0736	18.4765	18.7856		21.9611			20.3433															18.9488		19.213					18.5553			21.4863	22.5915	22.199	22.9361	19.2425	19.8391	21.7734	18.893	21.2366	18.5104
WT-2_34		16.0561	21.3476	17.9256		19.7941		17.2158	18.8013								19.5423													18.5293							20.0958				21.544			19.9753	19.3355
WT-2_35		16.2776		18.2794		18.9993	19.2319	20.3881	19.3026		19.9621						18.1578				20.3564	20.4359								19.3802							18.1367			21.9489	20.6696			22.5327					19.2315
WT-2_36		15.4955		17.8218		18.6196	20.9776	17.1894	18.8356	18.7546			21.3344		18.5013		17.8052													18.9971		20.7213					18.3288			21.7496				21.0542			22.0128		19.2532
WT-2_37		14.9594		17.9187		17.9627		18.265	20.884	18.4963				19.0818			16.0948													21.0197		20.4544					18.8474			20.8043	20.0555	21.4928		18.9329					18.3931
WT-2_38		14.958	19.9782	18.5562		19.5252		16.8692	20.2575								18.4091													19.9265							18.2428			20.841				22.9644					16.9307
WT-2_39		17.9476		18.8859	21.6521	19.2158		19.3177	20.4148								18.7515													19.3977		19.1624					19.6149	21.9391				22.2242		19.6931					19.2858
WT-2_40		18.7208		20.9608		21.3458		20.9405	19.1147								20.4269					21.7071															19.6686												21.3702
WT-2_41		17.6313	21.498	17.6177		19.437		20.1703	19.3067	16.2481		21.4393			18.2403		19.1242													22.4303							21.5401				21.5548			23.2725			20.49	20.6361	18.5239
WT-2_42		15.4333	21.5209	17.5474		18.296		17.3182	17.7285	18.8248					21.0581						21.6885									18.6378		20.4241					20.1017		21.6483		20.6217			21.6299	21.8046			21.0371	19.7951
WT-2_43		18.8353		18.1597		19.0618		20.2596	19.3569						21.4189		16.7185					21.1691																						21.8531			22.7577		22.1172
WT-2_44		16.8262		17.9566	20.202	18.6246		20.0254	17.8621		21.7974		21.5035		21.19															21.9688		20.0283					18.8922			20.7606	20.769			22.4701			20.7914		17.9482
WT-2_45		17.4657		21.4171		20.0226		18.1646	19.0462																					21.448		21.6267					20.657			20.4915							20.6541		19.8476
WT-2_46		18.6103		18.5484		21.5984									19.8401																						21.4409	21.8605			22.1686			23.4702			22.9095		20.6609
WT-2_47		16.2577		17.6205	21.5239	18.8477		17.922	20.423		20.9037						16.2969				20.0795	20.0101								19.5388		20.4016					19.4639			20.766	22.0719				21.7989				21.9629
WT-2_48		16.5032		16.9258	21.6293	19.1585	20.8323	18.1196	18.7092				21.9981				18.1993					21.9129								19.3254							19.0859			20.41									21.2412
expressed cells	0	48	9	48	17	47	4	45	45	26	8	2	6	1	26	0	31	0	0	1	8	10	0	0	0	0	1	0	0	41	0	31	0	3	0	0	40	7	1	23	21	10	1	41	15	10	29	5	47
Probability	0	100	18.75	100	35.4167	97.9167	8.33333	93.75	93.75	54.1667	16.6667	4.16667	12.5	2.08333	54.1667	0	64.5833	0	0	2.08333	16.6667	20.8333	0	0	0	0	2.08333	0	0	85.4167	0	64.5833	0	6.25	0	0	83.3333	14.5833	2.08333	47.9167	43.75	20.8333	2.08333	85.4167	31.25	20.8333	60.4167	10.4167	97.9167
[truncated: 47 more columns]

## Sheet: GTML
cell	Acta1	Actb	Aldh2	Atf4	Atoh1	Atrx	Bcor	beta-catenin	Bmi1	Btg2	Ccne1	CD133	Cd15	CDH18	Cdkn1a	Crabp1	CyclinD1	Dkk2	Dppa3	Dyrk2	E2F1	E2F2(2)	Emx2	Eomes(2)	Esrrb	Fgf4	Fgf8	Foxd3	Foxp3	Fscn1	Gabra5	Gad1	Gfap	Gli1	Gli2	Grb10	Gstp1	Hoxb7	ImpG2	Inpp5f	Irf1	Jarid2	Kcna1	Kdm5b	Kit	Klf2	Klf4	Klf5	Ldhb
GTML-1_01		16.295	20.596	17.4186		17.0355	20.846	16.6069	20.0724	16.847	21.4787	19.3135								20.3049	20.688									16.7196		21.7435								20.6343		20.8237		20.173	20.4428		21.1475		21.6047
GTML-1_02		14.9896		15.9641		17.094	19.2438	16.5951	18.7459	17.147		19.1292			19.5643					20.9508	19.294	21.0317	22.1576							16.3748									18.8212		22.7703	21.963		17.6449	18.1815	22.9804		19.7662
GTML-1_03		15.7769	21.6698	17.8909		17.1366		17.4499	19.057	17.3572	21.646	18.9593			21.3282						20.8267									18.3681										21.5728		19.5035		18.286	20.2822				20.6574
GTML-1_04		15.9133		18.5133	21.7604	18.4207	19.4462	17.208	20.0327	17.8959	20.9825	21.3578			20.9238					20.1877										17.3234											22.2165			19.6699	19.8907		21.5269		20.1448
GTML-1_05		16.6228		17.303		18.9559		18.5329	19.9952	19.9567		21.8736			21.3704					21.1305										17.6012		20.4789								20.5768				20.1472					20.6261
GTML-1_06		15.9893		17.7662		17.7254	19.7415	16.977	19.6187	17.1464		19.6801									20.6568									17.2913									21.9329	20.579	21.0702	20.6697		19.0602	18.72				20.3281
GTML-1_07		15.8018		16.3871	21.7427	18.1249	19.2026	17.351	18.0971	17.7381		18.8245			20.6342					20.0885										16.158		21.0119				18.5782		20.9558	20.4836	21.3657	20.3831	20.9296		18.6174	17.5373				19.8943
GTML-1_08		15.8189	21.4626	14.8573		18.0902	19.7632	17.4777	19.0697	18.6786		20.0219								21.1025										17.058												21.7136		18.3597					21.0201
GTML-1_09		15.5502		16.3718		17.3324	19.9369	17.4603	18.427	18.783	21.8739	21.4669	21.1398		19.7844					19.6289	19.132	20.7899								16.1615									21.3168	21.4263				19.016	17.9911				19.9409
GTML-1_10		15.9753		17.2398		18.4916		17.3637	18.9754	19.1551	20.8935	19.7375								20.9712										16.7539										20.6385		20.7328		20.2093	19.8242
GTML-1_11		15.5284		17.7766		17.9025	20.1035	17.15	19.2127	18.7448		19.242									21.4585									17.6037										19.8882				18.2989	19.8373			21.4168	22.8069
GTML-1_12		14.7011		13.8811		17.6428		16.8127	20.1479	17.4186	19.3819	19.102			20.8749					20.0437	19.8163	19.6438								16.3783						20.4183				19.48		21.4054		18.9835	17.8688		21.8623	21.0834	19.3931
GTML-1_13		14.1846	21.2014	14.7431		15.8153	19.6909	15.4881	17.3686	16.6783	20.0436	18.5888			20.2888					18.5374	19.6145	19.7315	21.8877					19.9875		14.9939		19.9076							22.4372	18.7963	20.7304	20.9664		17.1618	18.4809		21.501	20.183	17.867
GTML-1_14		16.3413	21.721	16.2874		18.5734		17.4401	19.6622	19.024	20.9187				21.0179					20.597	20.3579									16.8806		21.7645												19.8048	19.4544		21.396		21.125
GTML-1_15		15.4896		17.2217		16.8886	18.9614	17.2927	18.3137	18.6851	19.7541	20.5406			19.1507						19.5259	20.112								16.8827									20.4517	20.9331				19.9566
GTML-1_16		15.9588		16.3286		16.9557		17.9163	18.4081	17.9136	18.3503	19.7734								21.1408	20.3042	20.9745								17.6283										20.8171				19.1451	19.1332			20.8188	20.6192
GTML-1_17		15.6229		16.7734		17.0783	19.2366	16.9443	17.969	17.8155	20.5763	20.942			21.3534					21.4468	19.214									16.5828										21.664		21.4519		18.0075	19.0422
GTML-1_18		15.4595		15.0699		17.8919	19.0558	17.2042	20.6909	18.7281		18.9998								20.0722	21.5115	21.8922	21.0773							16.7763										20.4318		20.1062		18.0425	17.9194				20.735
GTML-1_19		14.844		13.7192		16.6052	20.3688	16.8142	20.1176	19.3892	19.8251	19.6296			18.3147					19.6874	18.0211	20.4558								16.2217		21.7629									20.0866			18.4176	19.5876				19.8485
GTML-1_20		15.4311		15.958		18.1867	20.4984	17.5317	19.3255	17.5526	20.681									21.0446	21.8073									17.0153		21.5268				20.2918						20.6691		19.4161	18.6342
GTML-1_21		15.2743	21.8544	15.0604	21.2794	17.8311	20.3301	17.6146	20.3179	17.6555	20.6807	19.9311																		16.1132									20.504	19.7265		21.0344		17.6316	18.7196		21.7117		21.0512
GTML-1_22		16.5906		15.2403		19.3785	18.7508	17.412		17.0741	20.4581	20.9093	21.8016		21.0418					21.7369										16.7806									22.9591	21.0963	22.657			17.0695	19.2314		22.2708	20.6695	20.6716
GTML-1_23		16.5749		18.7033		19.1889		19.317	18.7695		21.8024									19.4477										18.7469		20.3284								21.2742				18.1301					20.8214
GTML-1_24		16.5616		17.3553		18.8921	19.9612	18.8358	18.9346			20.5995	21.4797							21.1139										17.6271		21.6211												19.843			21.5443		20.1934
GTML-1_25		14.9931	19.2282	16.401		17.0149	18.4474	16.4246	18.4462	15.975	20.6549	17.8613	20.8102		19.9109					20.1302	20.9357		21.9191							16.7329														17.9626	16.9636			21.3797	22.2829
GTML-1_26		15.4248		16.9099	21.9311	17.4557	20.8521	16.5153	20.1075	17.8908	21.5909	20.1052									21.3235									16.9262										19.9951		21.0616		18.9777	19.597			21.5514	20.787
GTML-1_27		14.888		16.4053		17.0273	19.3409	16.3398	17.4227	16.4497		18.5434			18.613					21.2211	19.4224	21.7217								16.5806										20.5662	22.2661	22.6432		18.2819	20.9563			20.0956	22.5133
GTML-1_28		14.6321		17.8697		16.0229		16.0469	18.187	15.7076	20.5403	18.0481			21.3087					19.038	18.9309	19.3743	22.8354							15.934								21.8762	22.7032	20.8516		19.7019		18.1772	19.2503			19.6464	20.6664
GTML-1_29		15.7684		15.6117		16.9953	19.9882	16.6907	19.2702	15.3244	19.5026	20.6685			17.4895						18.058	19.0757								16.7079		20.7077								19.7106		21.1988		19.7207	20.0589			19.809	19.6507
GTML-1_30		17.0993		15.9292		18.3609	20.6203	17.8805	19.978	17.5377	21.0205	19.0768																		18.0883														18.8545	21.2239				22.353
GTML-1_31		15.8487		15.8416		17.5894	18.8539	17.3017	20.438	18.3011		18.4283	20.4413							21.0307	20.6309									16.63										20.6859	21.1702		20.9225	19.7818	18.7464
GTML-1_32		15.6086		16.2288		17.3653	19.7422	16.238	17.7621	18.4025	21.64	18.1018	21.0012							21.1847	20.5339	19.7227								16.5754									22.1144	20.0758	22.4527	19.7851		19.0698	18.4056			19.4966
GTML-1_33		14.843	21.7964	16.8583	21.4723	17.1073		16.3208	20.2549	16.2718	21.0508	18.7174			19.7909					21.1613	20.6457	21.9165								16.4614										21.1184				18.1533	21.3259	22.3064	21.0816	20.9466	20.1023
GTML-1_34		15.2608		16.6077		17.6392	20.066	16.6964	19.7617		19.323	18.1617								20.8865	18.9708									16.7774										20.2557	21.0316			19.4368	20.2995				20.2986
GTML-1_35		17.0036		15.3132		18.3111	19.9986	18.1019	19.9939	18.5929										20.2055										18.9896		20.7839							21.9893	21.0299				18.1729	21.8021
GTML-1_36		15.784		17.3599		17.0891		17.6005	20.0141	16.6995	21.2151	20.0175								21.1302			21.8576							18.4005									21.48	21.999	21.961	20.4838		18.3527	20.4583		21.5173		21.8682
GTML-1_37		14.7996		17.3326		17.1862	18.6772	16.2179	19.3853	16.7162		18.1966								19.8841	20.062									16.6846										19.7246		19.6636		18.8365	18.9802		20.3803		19.8778
GTML-1_38		15.6772		17.7507		17.1926		17.0595	19.2711	16.7909	20.7261	19.0012		19.8504						21.3542	19.5234	20.8379	22.1371							17.2889									20.8747	19.9306		21.5413		19.7776			22.6955	21.3524	20.9135
GTML-1_39		16.1767	19.78	15.6642		17.988		17.0833	19.3684	17.4819		19.6145	21.1164		21.875					20.9776										17.9599										20.2291				19.27	19.0807		20.2807	21.8245	19.6674
GTML-1_40		17.0036		16.9108		18.9634	19.4326	17.1098	19.7616	17.272		17.7422			21.5574															16.7298		21.0683								21.3088				18.2329	17.0848			19.9147	21.3979
GTML-1_41		15.6906		15.1254		17.5467		17.4581	19.0441	17.8929	18.7407	19.4927	20.7071		19.4053					19.7619	18.5535	20.0618								16.8181		21.1598									21.5361			21.6851	20.8709		22.3661	20.4817	20.0045
GTML-1_42		16.5762		17.2681		17.6126		17.1029	18.3079	18.2808		20.398	20.1671		20.6404					19.8808	21.0282									16.5838		19.3409							21.0808	21.4292	21.0421			19.1125	18.6082				22.4775
GTML-1_43		16.4164	21.9869	16.0294		18.1254	20.4903	16.9306	19.3223	15.4841		20.5984	20.6777							20.8805										16.5978									20.5889	21.473	21.2069	20.7132		20.8002	17.8807		20.9703		20.7073
GTML-1_44		15.5882	20.504	14.4772		17.5184	20.8033	17.1105	20.5303	18.5444	19.6758	20.0219			20.6818					20.6803	19.1122	19.4412								16.8858								21.161		21.8326				19.5197	19.577			20.4661	21.3762
GTML-1_45		15.4227		15.6292		16.984	18.9368	15.8006	17.4766	17.1364	19.7253	18.6901	19.4506		20.4569					18.7729	19.3148	19.8225	22.5686							17.109		20.6884						21.4857	21.7907	20.2771	20.7332	20.9587		18.3669	17.7491		21.1879	21.9429	21.9383
GTML-1_46		17.4532		17.758		18.9164		18.1783	19.9443		21.9812	20.2772			20.9489					21.0065										18.2986		21.1061									21.3617			19.6303					21.3122
Expressed cells	0	46	11	46	5	46	31	46	45	42	30	42	11	1	25	0	0	0	0	37	30	17	8	0	0	0	0	1	0	46	0	16	0	0	0	3	0	4	16	35	17	23	1	46	39	2	16	19	38
total cells	46
Probability	0	100	23.913	100	10.8696	100	67.3913	100	97.8261	91.3043	65.2174	91.3043	23.913	2.17391	54.3478	0	0	0	0	80.4348	65.2174	36.9565	17.3913	0	0	0	0	2.17391	0	100	0	34.7826	0	0	0	6.52174	0	8.69565	34.7826	76.087	36.9565	50	2.17391	100	84.7826	4.34783	34.7826	41.3043	82.6087
mean value		15.7664
Standard error
[truncated: 47 more columns]

## Sheet: GTMLdox
cell	Acta1	Actb	Aldh2	Atf4	Atoh1	Atrx	Bcor	beta-catenin	Bmi1	Btg2	Ccne1	CD133	Cd15	CDH18	Cdkn1a	Crabp1	CyclinD1	Dkk2	Dppa3	Dyrk2	E2F1	E2F2(2)	Emx2	Eomes(2)	Esrrb	Fgf4	Fgf8	Foxd3	Foxp3	Fscn1	Gabra5	Gad1	Gfap	Gli1	Gli2	Grb10	Gstp1	Hoxb7	ImpG2	Inpp5f	Irf1	Jarid2	Kcna1	Kdm5b	Kit	Klf2	Klf4	Klf5	Ldhb
GTML1-dox_01		20.2816		20.5614		20.2759				19.4326		21.5614																		20.2557									20.508					19.9788
GTML1-dox_02		18.7335		18.7939		18.8508	20.9057		19.5167	17.7416																				18.2993		19.2393							21.5594	20.7074		21.296		19.5862					22.217
GTML1-dox_03		18.9407		19.7411		19.6737			20.531	19.7208																				20.3361		19.7967							21.6777					18.9414
GTML1-dox_04		18.3534		20.403		19.9331			20.2956	20.1957		21.5374																		19.4005		19.1331							20.2217			22.9095		20.6189
GTML1-dox_05		18.9536		20.3379		18.9275			20.0124	19.9891																				19.3064		19.0354							22.2743	21.2074		21.9326		21.316
GTML1-dox_07		17.2313		18.471		18.4604	20.8931		20.6905	18.4252		20.0979									21.9144									18.4111		18.3591							20.1028					19.5228					21.773
GTML1-dox_08		19.0455		18.0775		20.973			20.9558	20.1907		19.847																		20.1318		20.694							22.5469		22.4746	21.9489		20.2397
GTML1-dox_09		19.1028		19.2969		19.8828				18.5802		21.8703																		19.5614		20.9748							22.0627			22.176		19.5187
GTML1-dox_10		18.4962		18.8433		19.0701				20.1525		21.6675																		19.4687		18.8388							22.938					20.8805
GTML1-dox_11		17.4529		17.1684		18.4686			19.2285	19.1448		20.1817			21.6661						20.9172									19.5439		19.3477							22.8517					19.676	21.0892		21.7488		22.1312
GTML1-dox_12		19.1168		19.198		19.2347			20.7226	18.9527		21.3271																		21.0076		19.2404							22.5026					19.4246					22.474
GTML1-dox_13		17.7937		18.1044		19.0904			18.9882	17.9943		21.8938																		18.0645		18.6245							20.7648			20.8976		18.8392
GTML1-dox_14		17.2149		17.9392		17.9494	19.3951		18.4542	18.7649	21.4562	21.0883			20.6098						19.8956									18.0633		18.4138							20.6219	20.8916		20.6256		18.7251				21.6859	22.0923
GTML1-dox_15		17.8677		18.515		18.1769	20.7012		19.5664	18.4418		20.0062											21.9477							17.9217		18.4546							21.1409			20.2012		19.0238					20.9695
GTML1-dox_16		17.2209	21.3157	19.2761		18.585	20.9517		20.0642	19.1365																				18.6041		19.5818							20.7057					19.5305
GTML1-dox_17		18.53		19.4475		18.9817	20.1827		19.9897	18.2532										21.8634										18.5892		19.3576							20.9836			19.9106		19.4555			22.9404		22.2477
GTML1-dox_18		16.7571		16.729		17.9245	20.5124		19.0935	18.0397		20.3794								21.7036										17.7566		17.8949							19.3673	19.5049		21.6424		18.9651					22.2535
GTML1-dox_19		18.3798		19.983		18.7292			19.925	19.2981										21.8628										18.5335		18.9899							22.0787			20.8242		20.2908
GTML1-dox_20		17.6625		19.4949		19.3473			19.3058	18.5609		20.6461																		18.3723		19.243							21.8482					19.0942
GTML1-dox_21		18.3555		19.0898		18.9873			20.9	18.2213		21.9406								21.8725										19.7234		19.0195							21.4952	21.4269				20.4798
GTML1-dox_22		20.0614		20.402																										21.4742		21.3944												20.6104
GTML1-dox_23		16.6276	21.4913	16.4094		17.1834	20.0818		18.6158	16.9037		19.6851								20.9876										17.5938		17.4639							19.8259	19.417				17.8821			22.6183		21.3704
GTML1-dox_24		17.6675		18.1188		19.08			19.9853	19.2135		21.3036																		19.0606		19.4055							20.9194			22.8866		21.6805
GTML1-dox_25		17.9364		19.6152		18.5543			18.7861	16.6011		20.8242																		18.7444		19.2519								21.6535		21.0203		18.4591					22.523
GTML1-dox_26		18.1181		19.2117		18.7369			20.03	17.5998		19.2459																		19.24		19.335							22.2246					19.1786					22.6737
GTML1-dox_27		18.8962		19.388		19.1084			19.8511	19.0154		19.9096																		19.4584		18.8141							22.3802			22.3746		19.8995
GTML1-dox_28		19.042		18.832		19.0813			18.2386	17.8853		19.0058																		18.9186		19.9653									22.9942	22.3289		19.517					22.4366
GTML1-dox_29		17.8485		18.0705		18.6891			20.4101	18.3881																				19.0961		18.8828										21.5127		19.8278
GTML1-dox_30		17.5669		18.0886		17.5295			18.5589	18.4347					21.8077						20.0621									18.2768		17.2897							19.0631	21.9549		21.6309		21.7293			21.2203
GTML1-dox_31		18.1613		18.4209		18.7737			20.9501	17.8189		21.1741								21.1112										18.697		18.0867							22.1596	20.8888		22.28		20.0853	20.4979		22.1973		20.4047
GTML1-dox_32		18.4508		18.7162		18.0285			20.0995	17.7283		20.2396								21.9674										18.5336		18.2679							19.7404			20.8066		20.0108			22.5536	21.9124
GTML1-dox_33		17.5781		19.1643		19.5232			19.4285	17.8985																				19.6342		18.2789							19.8331			21.9497		19.8922					22.9193
GTML1-dox_34		17.1089		16.6307		18.1474	20.1231		18.3421	16.6851		18.9758								20.8395										18.4152		18.0103							20.5074	21.6271		21.2126		18.1693					20.5248
GTML1-dox_35		18.4844		18.993		19.0894	20.8389		19.8869	20.6476											21.8561									18.4786		18.7261							22.4175			21.7071		19.6265					22.3909
GTML1-dox_36		18.8992		19.0163		19.5237			20.9744	18.185		19.8818																		19.246		19.8016							22.6089	21.5593		21.8858		19.7481					20.5468
GTML1-dox_37				20.9881		20.0763	20.9322		19.8222	20.9783										20.8474										21.7498		20.1788										22.9287	22.4789	21.4032
GTML1-dox_38		18.6152		19.0367		18.8188	19.6536		19.5324	18.2697		21.3323																		19.8738		19.1992							21.0901			22.0067		18.5065					21.6236
GTML1-dox_39		17.8958		18.9608		19.1639			19.7112	18.1038		20.8306								21.1665										19.2594		18.5718							19.9243			21.1115		18.6465			22.9477		21.6024
GTML1-dox_40		18.1779		18.0993		18.6755			18.7378	19.5675										19.5911			22.3836							18.4346		18.3932							22.0135	20.5905		22.1749		20.5244
GTML1-dox_41		17.7829		19.6874		19.8817	20.4235		19.2204	19.5471																				19.5879		19.2439							21.5955			21.7715		20.5606					21.2459
GTML1-dox_42		19.1012		17.5715		19.4154			18.8971			21.2375																		19.1028		20.2859							20.9349			21.7559		19.9665
GTML1-dox_43		18.4609		19.4897		19.1785	20.8645		19.1376	18.0493		20.2079											22.3163							19.0484		18.4858				22.7451			20.5283			20.9009		19.6572					21.0022
GTML1-dox_44		19.0401		19.33		18.9492	20.765		19.7403	17.8458		20.5074																		18.5435		18.6214							20.9493	21.6808		22.352		19.3468	21.6594				22.8354
GTML1-dox_45		19.4389		19.3558		18.9866			19.2972	19.6475																				19.9513		19.3788												18.4647					20.9539
GTML1-dox_46		18.8815		18.9748		19.216	20.5185		19.248	17.8054																				19.3831		19.5198							22.3125	20.2418				19.6606					22.7139
GTML1-dox_47		19.3753		18.3501		19.1795			20.447	18.6659		21.0172																		18.0962		19.1281							19.6533					20.8702			22.0423		22.6241
GTML1-dox_48		18.9684		19.5716		19.1407			19.8379	18.6714		21.3278																		19.0706		19.4048							21.125			21.8827		19.6549				21.7589
Expressed	0	46	2	47	0	46	16	0	43	45	1	31	0	0	3	0	0	0	0	11	5	0	3	0	0	0	0	0	0	47	0	46	0	0	0	1	0	0	41	14	2	32	1	47	3	0	8	3	25
Probability	0	97.8723	4.25532	100	0	97.8723	34.0426	0	91.4894	95.7447	2.12766	65.9574	0	0	6.38298	0	0	0	0	23.4043	10.6383	0	6.38298	0	0	0	0	0	0	100	0	97.8723	0	0	0	2.12766	0	0	87.234	29.7872	4.25532	68.0851	2.12766	100	6.38298	0	17.0213	6.38298	53.1915
[truncated: 47 more columns]

## Sheet: GTML MLN
cell	Acta1	Actb	Aldh2	Atf4	Atoh1	Atrx	Bcor	beta-catenin	Bmi1	Btg2	Ccne1	CD133	Cd15	CDH18	Cdkn1a	Crabp1	CyclinD1	Dkk2	Dppa3	Dyrk2	E2F1	E2F2(2)	Emx2	Eomes(2)	Esrrb	Fgf4	Fgf8	Foxd3	Foxp3	Fscn1	Gabra5	Gad1	Gfap	Gli1	Gli2	Grb10	Gstp1	Hoxb7	ImpG2	Inpp5f	Irf1	Jarid2	Kcna1	Kdm5b	Kit	Klf2	Klf4	Klf5	Ldhb
GTML1-MLN_01		19.2865		16.3582		19.533			18.9982	20.4368					21.7434															18.7557		18.7299												20.3111
GTML1-MLN_02		18.7085		16.9216		19.1335			19.7893	19.8341		21.9136																		20.2241		19.1523								21.0103				20.7986			22.0268		22.2886
GTML1-MLN_03		19.0242		16.9176		21.3365			19.2348	20.057					21.8681															20.7177		18.9764				20.3949				20.5836				19.3145
GTML1-MLN_04		18.7947	21.8567	16.2395		20.0957			19.7735	19.5958					21.6514															19.9645		20.0259								21.4271				21.924
GTML1-MLN_05		20.2839		16.7689		20.5311			20.1052	20.156																				20.981		20.0449
GTML1-MLN_06		18.9076		16.7753		19.8384			18.4438	21.8225																				18.6605		18.452								21.1709	22.7467			20.4574					22.3118
GTML1-MLN_07		17.8667		16.1024		19.0043			18.7876	20.8993					21.8681															19.3895		18.9121								21.1052				21.5081	19.9478				21.5879
GTML1-MLN_08		19.5144		17.4658		19.9709				20.9926																				19.7904		19.5425				22.1825				21.4941				20.5921
GTML1-MLN_09		17.5707		15.0251	21.7904	17.931	20.5095		17.854	18.3341	20.9229	19.6773			20.66					21.4677	21.9394									18.2968		18.0096				20.6943			20.151	20.7839	22.7353	20.6608		18.9768	19.4774				21.2867
GTML1-MLN_10		17.9285		16.2061		18.8858	20.8603		19.3394	18.2628	21.5389				18.413					21.9079	19.9116		21.9048							19.5433		18.5228								20.5578				20.2458			21.2214
GTML1-MLN_11		19.0614	21.1667	16.3391		20.0417			18.8149	20.4472					20.4765															20.0255		18.6328				20.9375				20.5089	22.7266	21.9143		19.7346					22.1785
GTML1-MLN_12		19.8243		18.562						21.886																				20.4905														22.8482					21.6951
GTML1-MLN_13		17.9963		16.4818		18.4688				18.8919		21.2646			21.1083															18.8467		18.8082				20.9155						22.6241		20.0946					21.563
GTML1-MLN_14		17.6339		15.7378		17.8726			18.4649	18.0703		20.5273																		18.5788		18.9663				20.1571			21.5856			22.6108		19.8267					22.1904
GTML1-MLN_15		18.3225		16.2388		19.6288			19.2827	19.8492		21.691			21.7266															18.8825		18.8036										21.5336		20.1151					21.955
GTML1-MLN_16		18.6085		15.9354		17.992			19.8341												20.3414									19.0794		18.2444				21.3718						22.2441		19.4089					22.6767
GTML1-MLN_17		18.2581		17.1299		19.0977			19.498	19.9853																				19.7993		19.221				20.3345				21.035		21.6975		19.7427	21.9807
GTML1-MLN_18		18.3809		15.714		19.1106	20.224		18.8359	20.5809					21.2727															19.4661		18.448				21.7458				20.4866				19.3833	21.8807				21.2916
GTML1-MLN_19		17.7281	21.8991	15.8677		18.227	19.7796		18.4543	18.8743	20.778	21.7017			20.7924						20.8607									18.5307		18.2325				22.2064				20.6619		22.1283		20.6441					22.1912
GTML1-MLN_20		18.3584		16.5107		19.4109			20.3608	19.984					21.8657															21.2143		18.4136												19.8937
GTML1-MLN_21		18.9059		16.22		19.273			18.8168	20.4324										21.3672										18.7937		19.1008				21.5591			21.6993					19.651	20.2683				22.2204
GTML1-MLN_22		18.8846		16.7619		19.2021			20.1193			21.8712			19.9184						21.4429									20.5014		20.5765								20.6348		22.3286		20.6042					22.2032
GTML1-MLN_23		17.8815		16.5541	21.8549	19.4706			18.6374	19.2477	21.8223	21.627																		19.7072		18.8504				21.4513				20.8671		22.4321		20.2781	20.0326				21.7671
GTML1-MLN_24		17.9599		16.4063		19.8578			19.1136																					19.9575		19.0706								21.9195				19.8854
GTML1-MLN_25		18.2732		16.1942		19.0591			19.0721	17.909		21.7098			21.8576															18.8518		18.6749				20.6267				21.2015				19.7143					20.7325
GTML1-MLN_26		19.5867		17.403		19.8612			19.3019	19.7466		21.2517																		20.5221		18.7687				22.762			22.9559					20.2355
GTML1-MLN_27		18.5698		16.5742		19.4153			19.4375	20.8186	21.8828									21.8306										19.3613		19.5921								21.8713		22.6675		21.8728
GTML1-MLN_28		17.5243	20.1611	14.7691	21.3813	17.8702			17.7336	19.1328					19.3516															18.4034		17.5336				21.2748				20.6421		21.7038		18.9817				21.5297	20.0487
GTML1-MLN_29		19.2848		17.5612		19.6498			20.5737																					22.7321		19.5195				22.9617				21.1553				20.4757			21.8761
GTML1-MLN_30		19.3374		16.5998		20.3792			19.8974						20.4626															19.94		19.2071							21.9254	21.9612		22.5995		20.7168					22.5196
GTML1-MLN_31		18.715	21.3822	16.155		19.0332			18.8844	20.5757		20.9375			20.7428															19.4458		18.9653												20.8061			22.9757		21.9893
GTML1-MLN_32		19.1891		16.9082		18.279			20.0999	19.6989																				19.9703		19.0225				19.6916			21.4217			21.4096		21.1242	21.4524
GTML1-MLN_33		17.7647		15.9762		19.6955			17.9508	19.7929	20.9187				21.4543						20.959									20.5587		17.6805				22.3015				21.6437		22.1378		20.1047
GTML1-MLN_34		17.4633		15.5116		19.3188			18.6476	19.5874		21.5862									20.0183									19.0586		18.7493				20.6815			22.9264	21.3631	22.3812			21.2459	21.8437		21.9437		21.0308
GTML1-MLN_35		18.3589		17.9522		19.311			18.9055	18.981		20.555			21.8358															19.2241		19.0627				21.0585								19.9304	21.8628
GTML1-MLN_36		16.9403	21.1944	16.0314		18.1283			17.9014	18.4126	20.7414	19.7591			20.2328					21.6473	19.6765									18.8111		17.7262				21.6807				20.4532				19.9806	19.7005		21.1563	21.3156	20.7338
GTML1-MLN_37		18.0498		16.5098	21.8067	18.6627			18.0671	20.5461			20.472		21.2675						20.4233									18.8325		17.3027				21.7415			20.7813	20.5804				20.5816	21.744		20.6428		20.2038
GTML1-MLN_38		18.015		16.6867		18.552			18.5418	19.248	20.5387	21.6137			21.4855						20.9834									19.715		18.2743				22.3327			22.0371	20.8982				20.7173	21.3997		21.1798	20.5961	22.7864
GTML1-MLN_39		18.6649		15.749		18.6743			18.0008	20.9189	18.9561				21.3605						19.6551									19.0879		18.0959								21.0007				23.8602	19.2541		20.6199
GTML1-MLN_40		18.2167		16.598		19.5301			18.9312	19.9325					20.3848															20.0265		19.814												21.1903
GTML1-MLN_41		18.4209		16.4241		19.3578			19.1566	20.7659					20.7237															19.5764		18.8996								21.9224				20.6324
GTML1-MLN_42		18.1611		16.4642		19.4345			19.0298	18.9851		20.7223																		19.8744		18.9045				22.2109			21.2267	21.3122				19.9291					20.6739
GTML1-MLN_43		18.8921		18.0132		21.2983			18.8825	20.5212		21.221								21.9407										20.6384		19.2455												22.5867
GTML1-MLN_44		19.0327		17.3476		19.3291	20.7435		19.221						20.7139															19.9567		19.0128										22.5216		20.9541					22.3879
GTML1-MLN_45		18.2742		15.3425		18.2154			18.3731	19.5403		21.0631								21.6777										18.3205		17.6155				21.5027			21.0947	20.5963		20.835		19.8442	21.7067		22.9912		22.7785
GTML1-MLN_46		19.5101		16.6112		19.1931			19.2627	21.9254																				21.1843		19.3103				20.7618								20.2259
GTML1-MLN_47		18.9533		16.311		19.1642			19.5673						21.5176						21.5388									19.7008		19.7218									22.3712			22.6842			21.721	21.9793
expressed	0	47	6	47	4	46	5	0	44	40	9	18	1	0	27	0	0	0	0	7	12	0	1	0	0	0	0	0	0	47	0	46	0	0	0	26	0	0	11	29	5	17	0	46	14	0	11	4	26
Probability	0	100	12.766	100	8.51064	97.8723	10.6383	0	93.617	85.1064	19.1489	38.2979	2.12766	0	57.4468	0	0	0	0	14.8936	25.5319	0	2.12766	0	0	0	0	0	0	100	0	97.8723	0	0	0	55.3191	0	0	23.4043	61.7021	10.6383	36.1702	0	97.8723	29.7872	0	23.4043	8.51064	55.3191
[truncated: 47 more columns]

## Sheet: WT1 Transpose
cell	WT1_1	WT1_10	WT1_11	WT1_12	WT1_13	WT1_14	WT1_15	WT1_16	WT1_17	WT1_18	WT1_19	WT1_2	WT1_20	WT1_21	WT1_22	WT1_23	WT1_24	WT1_25	WT1_26	WT1_27	WT1_28	WT1_29	WT1_3	WT1_30	WT1_31	WT1_32	WT1_33	WT1_34	WT1_35	WT1_36	WT1_37	WT1_38	WT1_39	WT1_4	WT1_40	WT1_41	WT1_42	WT1_43	WT1_44	WT1_45	WT1_46	WT1_47	WT1_48	WT1_5	WT1_6	WT1_7	WT1_8	WT1_9
Acta1
Actb	16.4239	18.1408	18.0435	17.7776	15.9483	16.1483	16.7114	17.3013	17.646	16.272	18.2677	16.4952	17.8114	18.9055	16.7147	17.434	17.0146	17.2662	16.472	16.1704	15.3517	20.1575	16.084	17.2779	17.012	16.5573	17.6319	17.3197	17.5	16.5982	17.2906	17.0059	16.1894	15.611	17.8301	17.3405	20.2128	16.9824	16.423	16.8703	16.4624	17.4957	17.1292	15.5012	15.5471	16.3943	18.0115	16.1038
Aldh2																														21.6567			21.744											20.988				20.5882
Atf4	20.7607	20.5345	20.9941	20.9782	17.9887	18.8171	17.9744	20.2645	20.1198	19.3309	19.0998	17.6979	19.5359	22.0431	19.6402	20.4459	18.7997	18.9504	18.1396	18.4854	18.5171		18.2927	18.7465	19.4962	19.6853	18.543	19.268	20.4952	18.9654	18.4193	18.3919	19.6239	18.1424	19.1459	19.8142		20.2619	19.0834	19.8795	18.6864	20.4797	19.7597	17.1384	17.4205	19.7357	20.4947	17.4497
Atoh1	20.8537												21.2063								20.8965					21.8507
Atrx	19.3823	19.6578	20.0081	19.2648	19.337	18.7627	19.2112	19.6322	19.6574	18.3197	20.6205	18.7416	19.2615	20.1171	18.4299	20.2125	20.3654	19.5251	19.6175	18.3269	17.87		19.5546	18.7453	20.0311	18.8867	19.4572	19.5482	19.4724	18.3492	18.7002	19.0983	18.8817	18.3358	18.8775	19.0718		20.9589	19.0541	19.0529	20.4944	20.7054	20.9212	18.5663	18.5734	18.9627	19.0847	18.2453
Bcor					21.6296		20.9175						21.8956		20.7598				21.3461		20.6475		20.9925		20.7138																			20.6507				21.6047
beta-catenin	19.7185	19.7228		20.9688	18.0575	18.7044	19.2504	19.2137	19.9373	18.8486	19.5029	18.2954	19.2175	20.6927	18.6507	19.6829	20.0059	19.7006	18.5163	18.7925	17.3614		18.2715	19.328	19.2555	18.7401	19.7865	20.0882	18.6164	20.0611	19.2695	18.4842	18.743	18.5121	19.6768	19.4039		19.3553	19.461	19.7013	18.7921	20.2967	19.5164	17.7949	17.7192	18.8807	20.3817	17.6837
Bmi1	18.2856	19.6533	19.7886	20.2775	18.8172	19.7752	17.9986	19.9411	18.749	18.4899	19.4527	18.1586	19.1917	19.9172	18.9272	18.7481	18.3056	18.2677	17.7723	18.7114	18.0778	20.0392	17.8113	19.6118	19.1962	20.0346	19.6564	19.6779	18.5226	18.7783	18.3894	18.4687	17.8749	18.1065	19.099	19.3307		18.6777	18.746	18.4738	18.9212	20.0106	18.7433	17.5067	16.9936	18.4721	19.6819	18.741
Btg2	18.5041	18.61	20.4102		18.9476		20.0393			18.9981			18.7372			19.0966			21.2598	20.4669	19.0972		21.9472	18.6248		19.1029				18.0404	20.1109			20.7268	19.4518	19.8211							18.2338	20.659			21.117
Ccne1							20.5785										21.9224	21.0674		21.2324								21.6958					20.342	20.3914				19.6479			21.2808			21.5686	19.6647	21.042		20.2735
CD133
Cd15
CDH18
Cdkn1a		18.8257	20.1985		18.6797	20.727	21.8772		21.2471	19.1311	20.6878		18.3956	19.2997	21.1631	21.4812	19.6771	20.7792	20.3192	21.037	18.8697	21.5087	19.5411	18.4377	21.1516	19.2744			21.7764	17.8395	19.135	20.0614	20.6413	20.4186	20.4475	18.9989			20.4657	21.1532			21.66		18.7492	17.7977	21.0306	21.4606
Crabp1
CyclinD1	18.9794	18.7388	17.717	18.2006	15.6359	18.5504			18.054	15.8634	16.6965	16.6531	16.438	20.0916	16.3927	19.6363	18.1183	16.9013	15.495	16.7581	16.9187	18.8038	16.3609	16.204	18.5103	16.5266	18.4844	20.4675	16.9615	19.2137	18.0142		16.7834	16.9216	16.9853	18.2682		17.5723	17.0065	17.2356	17.3606	16.4736	17.745	16.5363	15.3249	16.9204	17.5383	15.2054
Dkk2
Dppa3
Dyrk2
E2F1												20.5341																						20.0195				21.8779							21.7816			21.8568
E2F2(2)							21.7447													21.5949													21.5553												21.5988
Emx2																																		21.7287				22.5762
Eomes(2)
Esrrb
Fgf4
Fgf8
Foxd3
Foxp3
Fscn1	19.935	20.547	21.4804	21.487	19.052	20.806	19.5845	20.6302	21.6173	19.468	19.7957	20.1734	19.9398	21.5759	20.1953	20.4883	19.887	20.0703	19.7635	19.5326	19.1715	21.4499	21.058	20.2062	20.261	20.37	20.2222	20.6509	19.5514	21.9986	21.1996	20.7782	20.3479	19.7158	19.8088	20.1312	24.0224	19.708	19.6166	20.9779	20.5204	20.2135	21.1931	19.4624	18.8657	19.2512	20.608	18.4293
Gabra5																																			20.9179										20.4807
Gad1	18.8844	19.4306	20.7025	21.2216	18.097	18.6497	19.2359	18.9481	19.6235	18.5453	19.4233	18.4377	19.0517	20.5309	18.6024	19.6232	19.5584	19.4008	18.549	18.5149	17.2185	21.2353	18.2698	18.7084	18.8929	18.949	19.688	19.425	18.6714	19.8201	19.1434	18.3085	18.5982	18.7191	19.2387	19.2001		19.1285	18.9384	19.0487	18.7715	19.5456	19.4316	17.7103	17.3607	18.7702	19.6037	17.752
Gfap			21.9575
Gli1
Gli2
Grb10
Gstp1	19.523	21.759	20.0427	21.666	18.4683	19.6611	19.329	19.0471	19.9216	19.3669	20.6789	19.3869	18.8812		20.4336	19.6045	19.8766	20.2244	19.0841	18.5814	18.6454		19.1768	19.1364	19.7295	18.7375	19.4199	19.8503	19.4457	20.9167	19.0751	20.3353	18.8964	18.7822	19.6275			19.1447	20.3527	20.6024	20.0973	19.3989	19.227	18.2902		19.6986	20.1593	18.3624
Hoxb7
ImpG2
Inpp5f	20.8131		20.8779	21.3527	19.6762	21.7551		21.709		20.6411	20.8176	20.7348	19.8886		20.8184		20.7536			20.7589	19.4402		20.2545	20.0776	19.7184	21.8325			20.7479			21.7088		20.5981				21.5439	21.4013		20.9683	21.0594		20.079	20.3607	20.5672	21.4344	19.3372
Irf1					22.9992		21.2731	22.9748	21.233			20.9384	21.6449				22.5972	21.5451	21.6582	21.6055			22.1051				22.2433		21.9463		22.9077			21.5684		22.0163		21.8688	22.0775				21.9913	21.5429	21.4321			21.0988
Jarid2		22.0072													22.7548								22.9198					22.6605
Kcna1
Kdm5b	22.4061	21.7099	21.0486	22.0067	19.7794	21.9407			20.4082	20.44	20.2594	22.4123	20.8793	22.1241	20.0537	22.2995	22.2681		21.6388	21.6098	19.9223	23.6246	22.7137	20.2965	21.366	22.0056	21.3032		20.8761	20.0985	21.0509	22.4964	23.5866	22.492	21.2649	21.2832		22.0017	21.5709	21.3474	23.2894	22.222	21.6283	21.9417	20.6708	21.701	20.6574	22.4297
Kit				21.0187	21.9366	21.1646	20.8868		21.7349		20.7303	21.6998									20.4908			21.6549	20.6734				18.7363	21.044		21.7029	20.2987							20.86	19.7391		21.3548	21.7169	20.2929
Klf2
Klf4					22.0739					21.3234		21.5789	21.6943		22.2143			22.8052		21.5664	20.1558			21.5948		22.2642			21.4625			22.494		21.7681					22.4323				22.8008	21.8252	21.9605			22.7977
Klf5													21.8041																												21.9266				21.8288			21.566
Ldhb	21.0524	19.5003	19.7883		20.128	20.8818	21.5062	21.375	20.8239	20.1867	22.9686	20.2859	19.082	20.7468	19.7616	20.1196	20.9655	21.6236	19.7478	19.7195	20.311		19.779	18.8604	19.8693	19.8643	21.4661	20.7953	20.2621	19.0466	19.1746	22.6366	18.8362	20.3147	19.5966	19.2932		20.1169	19.9328	21.7135	20.4336	19.9133	20.1357	21.3379	19.7175	20.3997	19.8563	19.0443
Lef1
Lgr5	20.6137																		20.7337															20.6548										20.8193	20.3238
Lin28b
Lrrc2
Mpp3	20.6042		21.233		21.9852		21.5589													21.9009				21.4807				20.8001					21.4991			21.8809								21.0575	20.8039		21.5464
Musashi	21.6279	21.8431	21.5585		19.9787	21.3205	19.4407	19.478	20.7312	21.4142	19.9655	20.2013	21.0642		21.3853	21.5025	21.6117	20.4265	19.4191	19.4509	19.1222		19.8862		20.7242	21.4205	20.8421	19.4371	21.4521	20.8745	21.1497	20.2517	19.4949	19.7331		21.0855		19.0987	21.0823	20.72	20.2179	20.6698	21.8504	19.9342	18.9908	20.0596	21.8436	18.6545
Myc			21.2066		22.1114	21.2599		22.5155			21.6362		22.3539							20.8259	20.781			20.8458		21.574			20.5497						22.2981					21.0936		22.3038					20.3021	21.7974
Mycl1
MYCN
Nanog
NeuroD1				22.6871	20.2213		22.9883																																						22.4009
NeuroD2
Nodal
Notch3					20.7639	21.6153							20.4832											21.0006										21.7614
Npr3
Nr0b1
Nr5a2
Olig2	20.2703	20.9346	20.5013	20.4566	20.2665	20.4009	20.8852	19.8411	20.74	19.2612	21.9712	20.3358			21.8794	19.524	20.8056		19.9418	20.3237	19.539		20.9503	20.6911	21.2288				20.8973	19.8406	18.8943	20.9107	20.7063	21.3539		19.9667			20.2531	21.7238		19.9197	21.643	19.8429	20.5334	20.2033	21.3326	19.89
Otx2
Pabpc1	19.8794		20.8047	19.5928	19.9408	20.4273	18.9857	20.7359	20.6599	19.231	20.8451	19.4258	19.9347		19.6153	19.0292	18.3202	19.7277	19.6865	19.2779	18.2813	20.4723	18.5837	19.8116	19.5899	19.6777	19.8045	20.5415		20.5211	19.6193	19.3908	20.2452	18.9966	20.0206	20.6446		19.3194	18.0865	18.3171	19.0259	19.4529	20.8622	18.039	19.2318	18.2134	20.1797	18.4869
Pax6																																		22.4515
Pdgfa					20.9513	21.4425					21.8544	20.4291	18.5105						21.3803	20.9628	21.7947	21.8703	21.4834	19.5031	20.2345		21.741				20.3095					21.7065		19.2152	21.5262	21.4965		20.5145			21.3914			18.9129
Peg3	20.9071	20.5566	20.0365	21.1812	19.9222	19.2406	19.1342	21.0669	20.0236	17.8593	21.2857		19.1347	21.3358		21.0736	21.3217	21.4699	21.3506	19.8257	18.2747		20.0288	18.2104	21.2306	19.174	20.2627	21.3798	21.4916	18.2692	20.6165	19.3239	20.5704	18.5406	18.3928	18.8148		22.2863			22.3072		19.9631	21.0286	18.6916	19.8789	19.6711	21.0027
Pgk1												22.9009									22.8947
Phosducin
Pitx2
Pml		22.6643											22.8278						21.0881							22.9477					21.6503		21.973	22.4481				22.5152										21.5401
Pou5f1/Oct4
Ptch	20.9666	21.4852		21.6572			20.7636	21.7221		21.2819	21.3147	20.6902					20.4781	22.05	20.3096		21.9709			21.1195		21.1832		20.846	20.7045			20.9332	21.3908	20.6746	21.5204				22.3572	22.16		21.2937		21.1948	21.4439			21.4238
Rac3																	21.9136
Rest	20.7675	21.6897	21.1911		19.2216	21.3518	20.3392	21.3658	20.6599	20.9794	21.368	20.7069	20.119		19.1054		21.0491	19.6737	19.8785	20.2005	20.2702			20.31	21.8808	20.2849	21.092	21.7894	20.0815	19.5131	18.9868	20.619	19.5671	20.5889					21.6216	20.0714	21.6743	21.1678	20.9724	20.0369	19.8027	20.8579		19.2066
Ret S ant
Runx2
S100b
Sall1						20.8394	20.0489	21.6564				20.4022	21.5361	21.1549	20.5048				19.863	20.5098			21.8534				20.3621	20.0288	20.6756		19.7315	20.937	20.9343	20.5003				20.5007		21.4484			21.082	20.1425	19.3344	20.15		20.2614
Sfrp1	22.0819	21.7984			21.4845	23.1333	21.3013			23.8126			21.3967		21.3086	23.3556	21.9918		22.1141	22.8935		23.8813		23.5606				21.8974	21.6173	23.2857		22.3589	23.5317					23.1929			23.4282		22.9202	21.0419	22.4804	22.8779	23.9282	22.1422
Sox2
Sox9			22.2032	22.0478	18.6165	21.1634	20.0668	21.5191	20.6149	17.9259		18.587	19.6021	20.2744		21.5975	18.1428	22.0758	20.9755	21.2511	19.1152	21.6142	22.4006	19.7237	19.1315	19.7378	20.6609	20.6323	19.5153	19.2253	20.0816	20.2622	19.7782	21.9749		17.9973		20.6772	21.277	19.0698		22.036	22.6805	19.1722	16.9824	19.461	19.0237	18.534
T			21.5804			22.6161				22.6713			21.4455			21.2887	20.0265	22.3874	22.6446	22.828				20.4314	22.5348			20.9401	21.1708				22.2525		22.1809												21.4996	20.5714
Tbp	21.1974	21.8329			20.5836		20.5408				21.6796						21.2788	21.4978	21.1085	20.588	20.2347		21.0051	21.9625	21.3685	21.0995		21.8241	20.8638	21.8606	21.1503		21.3674	20.6208				21.9346	21.3008	21.3603		21.8913		19.7426	20.2539			21.8991
Tbx3
Tcl1							22.5154				21.4112		20.1158					21.9409	23.5357				20.8996	21.3351	23.1979	22.8257	23.6412	21.8341	21.5633		20.9604	22.5978	22.8204	21.0332	20.8524	22.4402	22.9478	21.9061				23.4542	22.9719	23.9696				23.5856
Trip10
Tuj1
Whsc2																			21.4841		21.4067		20.9333				21.6304																	21.1415
Wif1
Zfx	18.4445	19.5705	20.8703	21.0108	19.8122	20.2907	19.287	21.6615	22.2891	20.6202	20.8457	19.3681	19.2672	20.9764		21.3359	20.3079	20.4614	20.448	20.6245	18.6816		19.8907	19.5604	19.125	21.9144	20.4951	19.7705	19.7728	19.8945	21.1127	20.1621	19.5417	19.6209	21.7483	19.7		19.7884	19.6463	19.7075	20.5629	20.7487	20.8537	19.6988	19.1265	19.7218	21.0292	19.6222

## Sheet: WT2 Transpose
cell	WT-2_01	WT-2_02	WT-2_03	WT-2_04	WT-2_05	WT-2_06	WT-2_07	WT-2_08	WT-2_09	WT-2_10	WT-2_11	WT-2_12	WT-2_13	WT-2_14	WT-2_15	WT-2_16	WT-2_17	WT-2_18	WT-2_19	WT-2_20	WT-2_21	WT-2_22	WT-2_23	WT-2_24	WT-2_25	WT-2_26	WT-2_27	WT-2_28	WT-2_29	WT-2_30	WT-2_31	WT-2_32	WT-2_33	WT-2_34	WT-2_35	WT-2_36	WT-2_37	WT-2_38	WT-2_39	WT-2_40	WT-2_41	WT-2_42	WT-2_43	WT-2_44	WT-2_45	WT-2_46	WT-2_47	WT-2_48
Acta1
Actb	17.2645	16.2075	18.5113	18.677	17.9023	14.7849	16.9512	14.422	15.1111	19.0758	16.204	15.0605	18.4079	16.6439	17.3866	18.2964	17.3135	17.0545	16.2063	18.1723	18.1401	18.3733	18.7625	16.6528	14.9958	16.3189	16.9232	15.33	15.0765	17.4166	16.5097	16.8568	15.6698	16.0561	16.2776	15.4955	14.9594	14.958	17.9476	18.7208	17.6313	15.4333	18.8353	16.8262	17.4657	18.6103	16.2577	16.5032
Aldh2							20.9893				20.8933								21.6457	20.2289											20.858			21.3476				19.9782			21.498	21.5209
Atf4	17.3921	18.6754	19.2009	16.801	17.4704	19.3305	16.7908	16.8059	17.4451	18.5472	17.9392	17.7688	22.3168	19.154	16.7271	18.4338	17.4746	18.4287	19.7434	18.9419	19.6132	17.7687	18.9692	21.1372	17.4173	16.5882	18.7299	17.154	17.1172	17.8603	20.3272	17.7237	16.8012	17.9256	18.2794	17.8218	17.9187	18.5562	18.8859	20.9608	17.6177	17.5474	18.1597	17.9566	21.4171	18.5484	17.6205	16.9258
Atoh1					20.863	21.7252					20.9652			21.604		20.6228	21.0042				21.4959		21.2936		19.0761	19.6151	21.0944		21.9733		20.7984								21.6521					20.202			21.5239	21.6293
Atrx	19.7886	19.6201		18.8972	19.5178	18.4984	21.052	17.982	17.5103	19.9501	18.5039	18.6884	19.3451	20.3136	18.4661	20.4056	19.8769	18.2259	18.7653	19.1501	21.1986	21.4708	20.0604	19.3499	18.0202	18.6912	19.0136	18.6623	17.5907	19.0838	18.8087	18.1227	18.2964	19.7941	18.9993	18.6196	17.9627	19.5252	19.2158	21.3458	19.437	18.296	19.0618	18.6246	20.0226	21.5984	18.8477	19.1585
Bcor																									20.2398										19.2319	20.9776												20.8323
beta-catenin	18.6598	18.0636		19.3326	20.1228	17.2272	18.4726	17.4507	17.6955	19.1126	18.8664	17.2539	20.8644	18.2217	20.1401	19.4113	19.3786	18.4145	17.6965	20.0488	20.3917	19.3524	20.064	18.7952	16.8163	18.8736	19.6508	16.9942	16.8487		19.1483	18.5671	17.0736	17.2158	20.3881	17.1894	18.265	16.8692	19.3177	20.9405	20.1703	17.3182	20.2596	20.0254	18.1646		17.922	18.1196
Bmi1	18.7111		20.3582	19.8721	19.0646	19.0382	19.0273	17.7356	17.9314	18.4518	18.93	17.4497	19.8993	19.2868	19.8787	18.9061		19.7106	19.6846	20.8394	20.385	18.4734	19.9396	19.0617	17.9075	18.5632	18.2762	18.1378	18.8232	19.4118	18.9509	20.0978	18.4765	18.8013	19.3026	18.8356	20.884	20.2575	20.4148	19.1147	19.3067	17.7285	19.3569	17.8621	19.0462		20.423	18.7092
Btg2			19.5805	19.8555	19.6245		20.3917			18.385		20.1811	20.2716		18.0117	15.7186	16.1489			21.248	20.2613	20.2262	18.247		16.4725	17.0875		19.4209	18.6731	17.1944	19.6393	20.6398	18.7856			18.7546	18.4963				16.2481	18.8248
Ccne1								21.631	20.4982		20.4959	20.1789													21.2724										19.9621									21.7974			20.9037
CD133																																	21.9611								21.4393
Cd15			21.6456														21.1214									21.478										21.3344								21.5035				21.9981
CDH18																																					19.0818
Cdkn1a	21.5215	21.8073		21.3424	20.2558	19.9256	19.5849		18.5952	19.8891		20.2318			19.4169	18.7548	17.6071					20.6549	21.7913	20.9254		19.4716			21.2655	18.1738		19.6729	20.3433			18.5013					18.2403	21.0581	21.4189	21.19		19.8401
Crabp1
CyclinD1	17.1901	18.1876				17.9887	17.138	16.5418	15.1977		20.3495	18.522	20.7342	17.4966				17.5501		18.3528				19.8059	16.338	16.7073	18.3038	16.3161	18.115		20.2203	15.5528		19.5423	18.1578	17.8052	16.0948	18.4091	18.7515	20.4269	19.1242		16.7185				16.2969	18.1993
Dkk2
Dppa3
Dyrk2																																21.544
E2F1		21.3409						21.4446	20.5592		21.5038																		20.7449						20.3564							21.6885					20.0795
E2F2(2)								21.8628			20.6536	21.0369													21.0976				20.4839						20.4359					21.7071			21.1691				20.0101	21.9129
Emx2
Eomes(2)
Esrrb
Fgf4
Fgf8																				21.8457
Foxd3
Foxp3
Fscn1	19.8921	18.9828			19.8734	19.8416		17.8841	17.9799	20.101	19.6626	18.8662	21.7154	19.5199	21.3954		22.4018	19.4434	19.9782	20.6736	21.6043	20.0978	21.174	19.7045	17.2663	21.2253	19.7703	17.949	17.618	20.2235	21.5679	18.8082	18.9488	18.5293	19.3802	18.9971	21.0197	19.9265	19.3977		22.4303	18.6378		21.9688	21.448		19.5388	19.3254
Gabra5
Gad1			20.9403	20.8343	21.8519	21.0485	20.7317			19.3622	20.7113	20.3929		20.5245	19.614	20.0014	19.8662			20.7354	21.041	21.3393		20.8431	19.9865	18.9291	20.6508		21.271	19.9509	19.3179	19.019	19.213			20.7213	20.4544		19.1624			20.4241		20.0283	21.6267		20.4016
Gfap
Gli1				21.7714	21.1623													21.7713
Gli2
Grb10
Gstp1	21.5087	20.1312	20.5328			21.8309	19.5618	17.9875	18.4295		20.1854	19.7702	20.2412	20.7593	20.2719		21.2551	20.8221	18.8614	20.5597		19.8213		20.232	18.4902	18.5403	21.187	19.3891	18.9342		19.6672	20.1981	18.5553	20.0958	18.1367	18.3288	18.8474	18.2428	19.6149	19.6686	21.5401	20.1017		18.8922	20.657	21.4409	19.4639	19.0859
Hoxb7			20.5328						21.3277	21.2437		21.4221					21.5123																						21.9391							21.8605
ImpG2																																										21.6483
Inpp5f			21.0046			20.9374	20.9199	19.8195	21.5442					19.8453	21.9729	21.5229			20.6255	21.036						21.5308		21.4427	20.8736		21.5071		21.4863		21.9489	21.7496	20.8043	20.841						20.7606	20.4915		20.766	20.41
Irf1	20.147	22.2857	20.869	22.6359											21.254					22.3721			19.3838		20.3526	19.808	21.1915		19.6076		22.2691		22.5915	21.544	20.6696		20.0555				21.5548	20.6217		20.769		22.1686	22.0719
Jarid2			22.9117		22.7882		21.6442			22.4709							21.7599							22.9121				22.5261					22.199				21.4928		22.2242
Kcna1																																	22.9361
Kdm5b	21.9924	21.3851	20.4326	19.086	20.2252	19.0545	18.3323	21.1877	20.2658	20.3353			22.2997	20.5518	20.0179	19.1485	18.9625	20.0082	20.0834	20.9132	18.9293	21.1525	19.6816	19.8555	18.5805	19.4897	22.0597	19.5424		20.2523	20.5987	19.8518	19.2425	19.9753	22.5327	21.0542	18.9329	22.9644	19.6931		23.2725	21.6299	21.8531	22.4701		23.4702
Kit				21.9718					20.5264					20.1793		21.9092	21.7567		19.3657	18.3403				21.7535	19.2659			20.7071				20.7409	19.8391	19.3355								21.8046					21.7989
Klf2				20.5234			21.2484		22.0959			21.4905				20.5846	19.9359	22.784					22.7048								22.0461		21.7734
Klf4		21.2682	22.0896	21.7871	22.2349	21.4797	19.1765	21.7727	22.642	21.3522		21.8644			19.1012	17.9208	21.6558				22.6096		21.9327		21.6089	19.3797	21.5624		19.7739	20.1426	21.5762	21.1166	18.893			22.0128					20.49		22.7577	20.7914	20.6541	22.9095
Klf5															21.6456		19.1983																21.2366								20.6361	21.0371
Ldhb	20.4231	20.4076	18.974	19.3545	19.4821	19.1566	19.1212	17.0087	19.4008	18.7571	21.4982	19.9847	19.5698	20.6754	18.5065	18.9293	19.917	20.414	19.9501	21.3578	20.7569	19.1905	21.7834	20.1798	17.6354	18.8436	21.3914	19.6905	20.3535	20.3172	19.8463	18.5931	18.5104		19.2315	19.2532	18.3931	16.9307	19.2858	21.3702	18.5239	19.7951	22.1172	17.9482	19.8476	20.6609	21.9629	21.2412
Lef1
Lgr5																											20.7538		20.5279																			20.7405
Lin28b
Lrrc2
Mpp3				20.9148	21.5931	20.4739		21.3088	20.6303		21.5608	21.6267						21.4022		20.8711			21.8353	20.9098	20.8286	20.4492			21.2036			21.3369	20.7825		19.9334	20.932	21.2444		21.9257			20.3758	20.7726				20.3441	20.5306
Musashi	21.7783	19.5617	21.8094	20.4752	21.8043	20.4562		18.401	18.084	19.7504	19.4219	18.8002	20.6269	20.2752	21.6562	20.7403		19.1456	20.582	21.4403		19.6284	21.5147	21.4024	18.4037	20.4248	19.0687	21.4595	19.5976	21.6275	20.9183		19.1648	19.472	19.1874	19.444	20.4245	20.5806			19	20.2395	20.0539	19.6782	20.5341	21.4502	20.5489	20.3124
Myc				21.7498					19.7307				20.859	20.6786				21.5675		20.6649	22.5371					20.0184	20.6108				22.6805	19.5472	19.1259						20.1389		22.4087							20.5956
Mycl1
MYCN						24.6812																						25.8006
Nanog
NeuroD1												22.167
NeuroD2
Nodal
Notch3			21.0971				21.5934		21.8214					21.3271		20.7172	21.8062								21.1981	21.8448				21.1005	21.0362							21.1317
Npr3																																																19.3542
Nr0b1
Nr5a2				21.9696					21.6389																		21.721																21.9195				20.6288
Olig2		19.0681	21.8661					19.6869	18.167			19.4675	19.9579			20.2136		20.8696		20.0811	20.2854			19.0538	18.9043	19.5891	20.7791		19.7458		20.5282	19.9441	20.1276		19.9021	19.0697	17.9953	19.1069	19.8913		21.6549	20.2686		21.1412	20.6689	20.9076	20.8501	21.8073
Otx2
Pabpc1	19.7838	18.5992	18.0301	18.094	18.8695	18.0392	17.9281	16.9987	17.5128	18.261	17.8357	18.0001	18.6395	18.8219	18.6761	19.0497	17.8419	17.5446		17.9636	19.2283	19.4431		18.7961	18.0175	17.9368	18.8447	17.9261	18.2081	17.7165	18.6452	18.102	18.2054	18.2937	17.9416	17.8048	18.755	18.0764	18.1504	18.377	17.9867	17.7482	18.7496	18.0055	18.713	19.4357	19.3736	18.6588
Pax6										22.9769																												22.8766			22.8481
Pdgfa	20.978							20.4726		21.2542		21.9066							19.4945	20.6568			21.2564		20.978				20.9186					21.0991								20.9028
Peg3	22.2587	18.8741			20.8572		22.8386	17.9081	18.5677	19.7964	18.9986	18.9547			21.9733			20.4016	21.2821	20.0223					17.5039	21.8316	19.9534		20.3923	22.6306	19.8583	20.7893	20.9808	21.511	18.6639		18.5675	19.7639	19.2195		22.4637	20.5885	22.6455	20.5139	19.8939		19.2009
Pgk1		21.5448			22.0744			21.847	22.7243			22.2546	22.5452	21.4476			21.6367		22.9753							21.37	22.6636		22.4061	20.9442			22.5195			21.6145	21.5644	20.3909					22.5824	22.7011			22.1769
Phosducin										22.3164
Pitx2
Pml								22.0965							22.4783											22.9584															22.0174
Pou5f1/Oct4
Ptch				19.6281	20.6211	22.0029	19.833	19.8624	20.3696		20.985	20.0881					21.0566		19.8621					21.0541	19.4664	19.8738	21.4495		20.2825	20.6631		21.9777	19.9985	21.318	21.9218	21.5822			21.8944		22.1457	21.2822	21.2693	20.4439			21.1752	22.2586
Rac3	21.8118						21.9415		21.6041			21.3344				21.7381																21.6673						21.3573					21.0914				21.7993
Rest		21.1986	20.6701	19.7961		20.744	20.7612	17.7329	21.4147			20.7049		20.502	20.96	21.5705	21.3214			20.6107			21.2944		21.0476	20.1373	20.7636	20.4484	21.0789	21.5839	20.6172	20.3335	20.0981	19.932	20.0458	20.1154		20.5114	18.7219	21.5943	21.6162		19.9649	20.9579		21.8184	20.1295	21.0647
Ret S ant																														21.8241
Runx2
S100b
Sall1																					21.6057
Sfrp1								22.1831				23.4123	22.8903												22.3238																			21.3151
Sox2
Sox9			22.133	21.7945	22.8023		20.1074	20.2011	17.594		21.9177	18.212			19.5414	20.9053		22.9231		21.2333			21.9687	18.5045	17.4194	18.7979	20.9588	18.2185	19.2701	18.6886	21.2942	20.7977	17.8941	21.2656			20.1044	21.3006	20.4452		19.1166	22.5349	20.8756	18.9816	19.7541		20.2679	21.7812
T
Tbp	21.8352			20.7601			19.913		20.5145	21.4713	20.382	20.3627		20.9402	21.3951	21.3108	20.166				20.9457	21.0708			19.634	21.203	20.4904	21.1479	20.7459	21.8382		20.8508	20.8012	21.7224	20.0893	21.7983			21.1182		21.6274	21.8043	21.0164	20.0885		21.8069	20.4397	21.1079
Tbx3																									21.8039																				21.592
Tcl1
Trip10													22.9573																			22.3273					22.0205		21.4845
Tuj1							22.4165															23.2637			23.4277			21.5379	23.9628				23.4154				20.4542										23.9261	22.3645
Whsc2					21.1764			20.6647	20.9572		20.7192	21.0314				20.5392			21.2485						20.6541	21.1396		21.2091		21.4825				20.5476	20.9821	20.9304					20.3322
Wif1																																					22.5326
Zfx	20.3313	18.9672	19.3957	20.4736	21.4592	18.2156	19.8238	20.0896	19.6839	20.7156	20.4956	19.1744		19.514	18.622	19.9175	18.625	20.6581	19.8905	19.9383	19.8145	20.0188	20.7142	20.1862	18.5911	19.1626	19.8538	20.1678	20.364	20.926	18.9415		20.1829	21.37	18.7058	19.2144	18.6254	21.9594	18.6855	20.5438	19.4338	19.7031	20.0402	18.5043		21.702	18.9355	20.6248

## Sheet: GTML Transpose
cell	GTML-1_01	GTML-1_02	GTML-1_03	GTML-1_04	GTML-1_05	GTML-1_06	GTML-1_07	GTML-1_08	GTML-1_09	GTML-1_10	GTML-1_11	GTML-1_12	GTML-1_13	GTML-1_14	GTML-1_15	GTML-1_16	GTML-1_17	GTML-1_18	GTML-1_19	GTML-1_20	GTML-1_21	GTML-1_22	GTML-1_23	GTML-1_24	GTML-1_25	GTML-1_26	GTML-1_27	GTML-1_28	GTML-1_29	GTML-1_30	GTML-1_31	GTML-1_32	GTML-1_33	GTML-1_34	GTML-1_35	GTML-1_36	GTML-1_37	GTML-1_38	GTML-1_39	GTML-1_40	GTML-1_41	GTML-1_42	GTML-1_43	GTML-1_44	GTML-1_45	GTML-1_46
Acta1
Actb	16.295	14.9896	15.7769	15.9133	16.6228	15.9893	15.8018	15.8189	15.5502	15.9753	15.5284	14.7011	14.1846	16.3413	15.4896	15.9588	15.6229	15.4595	14.844	15.4311	15.2743	16.5906	16.5749	16.5616	14.9931	15.4248	14.888	14.6321	15.7684	17.0993	15.8487	15.6086	14.843	15.2608	17.0036	15.784	14.7996	15.6772	16.1767	17.0036	15.6906	16.5762	16.4164	15.5882	15.4227	17.4532
Aldh2	20.596		21.6698					21.4626					21.2014	21.721							21.8544				19.2282								21.7964						19.78				21.9869	20.504
Atf4	17.4186	15.9641	17.8909	18.5133	17.303	17.7662	16.3871	14.8573	16.3718	17.2398	17.7766	13.8811	14.7431	16.2874	17.2217	16.3286	16.7734	15.0699	13.7192	15.958	15.0604	15.2403	18.7033	17.3553	16.401	16.9099	16.4053	17.8697	15.6117	15.9292	15.8416	16.2288	16.8583	16.6077	15.3132	17.3599	17.3326	17.7507	15.6642	16.9108	15.1254	17.2681	16.0294	14.4772	15.6292	17.758
Atoh1				21.7604			21.7427														21.2794					21.9311							21.4723
Atrx	17.0355	17.094	17.1366	18.4207	18.9559	17.7254	18.1249	18.0902	17.3324	18.4916	17.9025	17.6428	15.8153	18.5734	16.8886	16.9557	17.0783	17.8919	16.6052	18.1867	17.8311	19.3785	19.1889	18.8921	17.0149	17.4557	17.0273	16.0229	16.9953	18.3609	17.5894	17.3653	17.1073	17.6392	18.3111	17.0891	17.1862	17.1926	17.988	18.9634	17.5467	17.6126	18.1254	17.5184	16.984	18.9164
Bcor	20.846	19.2438		19.4462		19.7415	19.2026	19.7632	19.9369		20.1035		19.6909		18.9614		19.2366	19.0558	20.3688	20.4984	20.3301	18.7508		19.9612	18.4474	20.8521	19.3409		19.9882	20.6203	18.8539	19.7422		20.066	19.9986		18.6772			19.4326			20.4903	20.8033	18.9368
beta-catenin	16.6069	16.5951	17.4499	17.208	18.5329	16.977	17.351	17.4777	17.4603	17.3637	17.15	16.8127	15.4881	17.4401	17.2927	17.9163	16.9443	17.2042	16.8142	17.5317	17.6146	17.412	19.317	18.8358	16.4246	16.5153	16.3398	16.0469	16.6907	17.8805	17.3017	16.238	16.3208	16.6964	18.1019	17.6005	16.2179	17.0595	17.0833	17.1098	17.4581	17.1029	16.9306	17.1105	15.8006	18.1783
Bmi1	20.0724	18.7459	19.057	20.0327	19.9952	19.6187	18.0971	19.0697	18.427	18.9754	19.2127	20.1479	17.3686	19.6622	18.3137	18.4081	17.969	20.6909	20.1176	19.3255	20.3179		18.7695	18.9346	18.4462	20.1075	17.4227	18.187	19.2702	19.978	20.438	17.7621	20.2549	19.7617	19.9939	20.0141	19.3853	19.2711	19.3684	19.7616	19.0441	18.3079	19.3223	20.5303	17.4766	19.9443
Btg2	16.847	17.147	17.3572	17.8959	19.9567	17.1464	17.7381	18.6786	18.783	19.1551	18.7448	17.4186	16.6783	19.024	18.6851	17.9136	17.8155	18.7281	19.3892	17.5526	17.6555	17.0741			15.975	17.8908	16.4497	15.7076	15.3244	17.5377	18.3011	18.4025	16.2718		18.5929	16.6995	16.7162	16.7909	17.4819	17.272	17.8929	18.2808	15.4841	18.5444	17.1364
Ccne1	21.4787		21.646	20.9825					21.8739	20.8935		19.3819	20.0436	20.9187	19.7541	18.3503	20.5763		19.8251	20.681	20.6807	20.4581	21.8024		20.6549	21.5909		20.5403	19.5026	21.0205		21.64	21.0508	19.323		21.2151		20.7261			18.7407			19.6758	19.7253	21.9812
CD133	19.3135	19.1292	18.9593	21.3578	21.8736	19.6801	18.8245	20.0219	21.4669	19.7375	19.242	19.102	18.5888		20.5406	19.7734	20.942	18.9998	19.6296		19.9311	20.9093		20.5995	17.8613	20.1052	18.5434	18.0481	20.6685	19.0768	18.4283	18.1018	18.7174	18.1617		20.0175	18.1966	19.0012	19.6145	17.7422	19.4927	20.398	20.5984	20.0219	18.6901	20.2772
Cd15									21.1398													21.8016		21.4797	20.8102						20.4413	21.0012							21.1164		20.7071	20.1671	20.6777		19.4506
CDH18																																						19.8504
Cdkn1a		19.5643	21.3282	20.9238	21.3704		20.6342		19.7844			20.8749	20.2888	21.0179	19.1507		21.3534		18.3147			21.0418			19.9109		18.613	21.3087	17.4895				19.7909						21.875	21.5574	19.4053	20.6404		20.6818	20.4569	20.9489
Crabp1
CyclinD1
Dkk2
Dppa3
Dyrk2	20.3049	20.9508		20.1877	21.1305		20.0885	21.1025	19.6289	20.9712		20.0437	18.5374	20.597		21.1408	21.4468	20.0722	19.6874	21.0446		21.7369	19.4477	21.1139	20.1302		21.2211	19.038			21.0307	21.1847	21.1613	20.8865	20.2055	21.1302	19.8841	21.3542	20.9776		19.7619	19.8808	20.8805	20.6803	18.7729	21.0065
E2F1	20.688	19.294	20.8267			20.6568			19.132		21.4585	19.8163	19.6145	20.3579	19.5259	20.3042	19.214	21.5115	18.0211	21.8073					20.9357	21.3235	19.4224	18.9309	18.058		20.6309	20.5339	20.6457	18.9708			20.062	19.5234			18.5535	21.0282		19.1122	19.3148
E2F2(2)		21.0317							20.7899			19.6438	19.7315		20.112	20.9745		21.8922	20.4558								21.7217	19.3743	19.0757			19.7227	21.9165					20.8379			20.0618			19.4412	19.8225
Emx2		22.1576											21.8877					21.0773							21.9191			22.8354								21.8576		22.1371							22.5686
Eomes(2)
Esrrb
Fgf4
Fgf8
Foxd3													19.9875
Foxp3
Fscn1	16.7196	16.3748	18.3681	17.3234	17.6012	17.2913	16.158	17.058	16.1615	16.7539	17.6037	16.3783	14.9939	16.8806	16.8827	17.6283	16.5828	16.7763	16.2217	17.0153	16.1132	16.7806	18.7469	17.6271	16.7329	16.9262	16.5806	15.934	16.7079	18.0883	16.63	16.5754	16.4614	16.7774	18.9896	18.4005	16.6846	17.2889	17.9599	16.7298	16.8181	16.5838	16.5978	16.8858	17.109	18.2986
Gabra5
Gad1	21.7435				20.4789		21.0119						19.9076	21.7645					21.7629	21.5268			20.3284	21.6211					20.7077						20.7839					21.0683	21.1598	19.3409			20.6884	21.1061
Gfap
Gli1
Gli2
Grb10							18.5782					20.4183								20.2918
Gstp1
Hoxb7							20.9558																					21.8762																21.161	21.4857
ImpG2		18.8212				21.9329	20.4836		21.3168				22.4372		20.4517						20.504	22.9591						22.7032				22.1144			21.9893	21.48		20.8747				21.0808	20.5889		21.7907
Inpp5f	20.6343		21.5728		20.5768	20.579	21.3657		21.4263	20.6385	19.8882	19.48	18.7963		20.9331	20.8171	21.664	20.4318			19.7265	21.0963	21.2742			19.9951	20.5662	20.8516	19.7106		20.6859	20.0758	21.1184	20.2557	21.0299	21.999	19.7246	19.9306	20.2291	21.3088		21.4292	21.473	21.8326	20.2771
Irf1		22.7703		22.2165		21.0702	20.3831						20.7304						20.0866			22.657					22.2661				21.1702	22.4527		21.0316		21.961					21.5361	21.0421	21.2069		20.7332	21.3617
Jarid2	20.8237	21.963	19.5035			20.6697	20.9296	21.7136		20.7328		21.4054	20.9664				21.4519	20.1062		20.6691	21.0344					21.0616	22.6432	19.7019	21.1988			19.7851				20.4838	19.6636	21.5413					20.7132		20.9587
Kcna1																															20.9225
Kdm5b	20.173	17.6449	18.286	19.6699	20.1472	19.0602	18.6174	18.3597	19.016	20.2093	18.2989	18.9835	17.1618	19.8048	19.9566	19.1451	18.0075	18.0425	18.4176	19.4161	17.6316	17.0695	18.1301	19.843	17.9626	18.9777	18.2819	18.1772	19.7207	18.8545	19.7818	19.0698	18.1533	19.4368	18.1729	18.3527	18.8365	19.7776	19.27	18.2329	21.6851	19.1125	20.8002	19.5197	18.3669	19.6303
Kit	20.4428	18.1815	20.2822	19.8907		18.72	17.5373		17.9911	19.8242	19.8373	17.8688	18.4809	19.4544		19.1332	19.0422	17.9194	19.5876	18.6342	18.7196	19.2314			16.9636	19.597	20.9563	19.2503	20.0589	21.2239	18.7464	18.4056	21.3259	20.2995	21.8021	20.4583	18.9802		19.0807	17.0848	20.8709	18.6082	17.8807	19.577	17.7491
Klf2		22.9804																															22.3064
Klf4	21.1475			21.5269								21.8623	21.501	21.396							21.7117	22.2708		21.5443									21.0816			21.5173	20.3803	22.6955	20.2807		22.3661		20.9703		21.1879
Klf5		19.7662									21.4168	21.0834	20.183			20.8188						20.6695			21.3797	21.5514	20.0956	19.6464	19.809			19.4966	20.9466					21.3524	21.8245	19.9147	20.4817			20.4661	21.9429
Ldhb	21.6047		20.6574	20.1448	20.6261	20.3281	19.8943	21.0201	19.9409		22.8069	19.3931	17.867	21.125		20.6192		20.735	19.8485		21.0512	20.6716	20.8214	20.1934	22.2829	20.787	22.5133	20.6664	19.6507	22.353			20.1023	20.2986		21.8682	19.8778	20.9135	19.6674	21.3979	20.0045	22.4775	20.7073	21.3762	21.9383	21.3122
Lef1		20.4202	21.1848	20.0231	20.5083	19.8306	18.1855	18.9465	18.2928	19.7837	17.951	19.3569	18.7614	20.7572	20.6211		18.2627	19.0289		18.7242	20.054	19.4782	20.8571	20.188	20.1444	20.2683	18.1837	18.3253	19.8862	18.4029	19.5384	20.1204		20.1695	20.1015	19.3974	17.9682	18.4042	21.5574	21.3151	20.6054	20.1263	20.9323	19.1677	18.0398
Lgr5													20.7632																			20.5162
Lin28b
Lrrc2
Mpp3	19.1631	19.5179	20.2081	19.219	20.7212	20.5553	20.7576	19.0265	19.612	19.5623		19.2762	18.866	21.2338	18.5498	21.6766	19.3627	19.7926	19.2427	19.1999	19.4941	20.3031	20.9251		19.5082	19.7378	19.4183	18.1332	18.7748	21.2298	20.3473	18.8126	20.0582	19.6347		19.5358	16.9526	17.9723	20.0946		19.0213	19.5975	18.7934	18.561	17.3415	19.1851
Musashi	17.7571	15.8905	17.3188	18.0613	18.8581	17.9712	17.6059	17.3332	16.8403	16.9844	16.7509	17.198	16.1318	17.3903	15.8286	17.0975	16.9046	17.1436	16.2271	17.4901	17.2183	17.7555	18.3394	17.5877	15.9247	17.0252	16.4796	15.3916	16.2247	17.5044	16.38	16.3653	16.888	16.7435	17.0475	16.7407	16.2761	16.2542	16.9535	18.503	16.6546	17.4739	16.7143	16.4961	15.7086	17.1778
Myc
Mycl1																			21.6699	21.2136														21.6014				20.3975		21.314					21.1561
MYCN	16.5783	18.8355	17.7196	17.3327	18.9943	16.3592	18.1792	17.7073	17.5357	18.6765	21.4356	19.5684	17.1099	19.1748	19.0839	17.9005	17.9191	16.3888	18.2113	18.1483	17.8386	18.5304	17.2034	18.2676	16.1283	19.8684	18.0659	17.7715	17.7357	21.321	16.4096	15.0964	16.1793	16.5071	17.0351	16.2597	15.9628	17.2213	17.3383	16.7445	16.2526	19.0474	16.9277	17.9825	15.7911	16.1418
Nanog											18.4518
NeuroD1	19.4587	17.06		18.6481	18.9306	18.3211	18.8974	20.1694	17.5641	18.1177	18.7913	18.9205	17.037	18.7878	19.462	17.9773	18.278	19.7958	19.3289	17.497	19.1939	21.7371	20.7745	21.1663	16.8215	18.2589	17.1148	17.2447	17.4278	18.8652	18.6429	17.3832	16.5331	17.7342	19.8833	18.0357	16.4667	18.2264	17.9274	19.4988	17.3106	17.7047	18.9486	19.6106	16.1493	18.7662
NeuroD2																													22.7419
Nodal
Notch3
Npr3												19.6969																										20.2118
Nr0b1
Nr5a2
Olig2
Otx2	17.6132	16.8854	17.3447	19.1035	20.1238	18.0228	19.0895	18.2385	17.699	18.4526	17.7607	17.9366		18.9759	16.9995	18.1431	19.4046	17.7463	16.9624	19.6445	17.6113	17.9943	20.3738	19.9786	17.0632	17.5295	17.3522	16.9604	17.4923	19.4018	17.9343	17.2783	18.1377	19.7369	18.4133	18.3724	18.1042	17.7948	18.8441	18.7701	18.3739	17.9841	18.242	18.918	17.9778	18.6938
Pabpc1	17.9546	16.6872	17.4206	17.3983	18.403	17.1784	17.1804	17.0085	17.6932	18.096	18.2829	16.549	15.1874	18.0632	17.7464	18.5328	17.2764	16.5996	16.0658	16.962	17.009	17.8538	17.9403	17.8152	17.6345	18.3416	17.1828	16.9026	16.6991	18.5954	19.9317	17.9045	16.9944	17.6951	18.9806	17.4531	16.6483	18.1645	18.1455	18.2603	16.7196	17.2927	18.0263	16.1588	15.2806	18.0924
Pax6		19.3292					21.8255		20.6388			21.8356	20.7584		20.7156					21.0765					22.2489	20.5788	20.4499	21.148													22.6772	22.6294	22.3685		22.3356
Pdgfa		20.9919		21.8941	19.9138	21.8329	20.2401	20.3506			21.199	21.6944	21.9045		20.2536	20.3976		20.4073	20.4437	20.7968	20.2124	20.8119	21.8278	20.7019			21.6743	20.9058	21.0488				20.1984	21.4492	21.9462		21.5751	20.5616	20.0195	21.4753			21.819	21.0112	20.2111	20.4624
Peg3	19.1929	17.0182	19.7914	19.6871	18.9534	19.7691	18.916	19.8961	17.8033	20.5938	16.5483	18.1915	17.9136	19.9323	18.4748	17.821	18.3026	20.9769	17.299	20.0499	19.3307	17.3726		19.5317	19.6269	20.5737	18.0279	17.7499	17.6889	18.9417	19.975	18.1877	18.6119	19.3525	17.8212	20.7171	19.5463	19.3107	20.4129	18.86	19.5184	17.663	19.2707	19.8397	17.8605	20.747
Pgk1	20.1213	18.6111		19.9693	19.6689	21.3044	19.3506	19.3095	19.4653	21.7703		19.9912	20.5716		21.1225	22.96		21.634	19.1699	19.2033	19.721	19.7526	22.0606			22.6714	22.0396		20.023	20.5626	20.4587	20.6413	21.6414	21.5372	19.8657	21.0113	19.4711		19.1819	20.2213	21.5165	21.0975	21.4507	20.9113	19.6605	20.6103
Phosducin																21.6119
Pitx2			20.2214				22.9763	21.2784	20.9821		21.9595	21.8695	21.4991		22.3214		21.6816		21.778	21.2157	22.0833						21.307	20.7823	22.5732			22.3676	22.9253			22.1646			22.7354	21.5406
Pml												21.2315														21.9326					21.5262									22.7782
Pou5f1/Oct4
Ptch		20.3561	20.9892	19.2375	21.64	18.225	19.3646	20.8303	20.9474	21.1403		20.2714	19.0379	20.0926	21.1865		19.8063	20.6376	20.272	21.9914	20.9445	18.3782	21.4631	19.3539	20.7607	20.4539	19.5639	18.8803	20.7399	21.8537	19.698	19.0211	22.0711	19.8484		20.4948		20.0592	21.4382	20.8904		19.7707	21.2599	19.2116	19.9557	20.9116
Rac3							19.958	21.7225					20.7273				21.4677	21.7836			19.8608				21.8094	21.5644							19.8537												20.564
Rest		20.2869			20.657		21.7969	20.8537	20.2426		18.8854				20.1299	21.5693	21.078		20.2044							20.7968	19.8075	20.2889		21.4072					21.17			20.0478		20.3602	21.2314				20.688
Ret S ant										20.8237					17.4083				18.1849		20.5131				18.6967										19.5361		16.9571				20.478		20.8807
Runx2
S100b
Sall1	16.2447	15.6698	15.7815	16.6991	17.7718	15.0167	18.2579	17.2179	15.668	15.587	16.7905	18.2003	14.685	17.431	16.073	18.1821	15.9656	16.5553	16.4227	16.259	15.0396	16.0939	17.0915	18.2387	15.8841	17.3255	15.8323	15.4079	16.8598	17.8494	17.0348	15.5848	16.0671	18.0634	18.8689	17.1327	16.373	16.0102	16.4465	17.7691	16.1433	15.7361	16.5037		15.7139	17.5267
Sfrp1
Sox2	22.5957	22.4473	20.5288				22.9082	20.9061	20.789		21.7966	21.8335	21.1178	22.7354			21.2969	22.2559	21.3389	20.9509	21.8363				22.8575		20.5056	20.7449	22.8797	22.1727	22.7942	21.9072			22.6819	21.6209		22.9638	22.9346	21.9056
Sox9		22.2698											21.1442									21.9796								22.0874	19.4511		22.6965		20.8576						20.9848	21.1147
T									22.2675				22.7308			22.6756										21.9725	21.8404		20.8423				22.5994	22.8042				21.5997					21.8931	22.6528	21.839
Tbp	20.001	18.9773	20.2539			19.9366	20.6254		20.4141	21.0876	18.8739	19.0163	17.5591	19.0633	20.1867	20.792	20.8012	21.7626	18.7419	20.2066	20.7039	20.0008		20.9563	19.4434	19.9055	19.1755	19.736	18.4144	20.521	20.4919	20.2785	21.2691	21.3729	20.1147	19.8155	19.9402	20.8646	19.8558	20.5961	20.3451		19.5791	18.4975	18.7814	21.1543
Tbx3				21.7071		21.9785	21.6105									20.7499		20.248									21.9202									21.715
Tcl1
Trip10								21.8297					22.8031						22.0359		22.3973	21.9835									22.0549	21.1424	22.3688	21.7935	22.1125		20.5975	21.6175				22.8897		22.5352	21.6383
Tuj1	20.7566	22.3586	19.7918	20.4065	22.5057	19.6986	21.5059	19.4293	20.9327	21.6087	22.1764	21.6959	18.6339	21.02	22.3421	21.6773	21.3118	19.0286	19.7332	20.5145	22.2029	20.5054	22.428	21.2022	21.8668	18.9439	19.6903	20.0146	19.8151	23.8088	19.1605	21.9578	18.7969	18.4772	20.4954	19.5164	19.1561	21.0955	19.2686		19.4504	22.2939	21.1212	18.719	19.1109	20.9476
Whsc2	20.0234		21.0377	19.9237		21.4585		20.2187		21.545	20.6208		18.7411		20.2232		20.3885	19.6892				21.0657						20.4024	20.3995		20.3314	20.753	20.3512		21.73	21.3094	19.7855	19.8976	20.9296		19.6377		20.5374	20.5307	18.2053
Wif1						22.7309
Zfx	19.651	19.6598	19.1752	21.0213	20.0725	19.9021	22.6502	19.108	18.2221	20.2945	18.661	19.1398	17.1819	20.4471	19.8615	19.7412	19.1266	19.0869	17.675	18.8727	19.2629	18.9216	19.9558	19.7353	19.3475	18.9578	20.5453	18.3675	20.1676	20.4485	19.0068	18.5552	19.0022	19.7077	19.3796	18.8273	18.7432	19.2442	20.1142	18.3977	18.671	19.5258	19.5746	18.2132	18.6793	19.6224

## Sheet: GTMLdox Transpose
cell	GTML1-dox_01	GTML1-dox_02	GTML1-dox_03	GTML1-dox_04	GTML1-dox_05	GTML1-dox_07	GTML1-dox_08	GTML1-dox_09	GTML1-dox_10	GTML1-dox_11	GTML1-dox_12	GTML1-dox_13	GTML1-dox_14	GTML1-dox_15	GTML1-dox_16	GTML1-dox_17	GTML1-dox_18	GTML1-dox_19	GTML1-dox_20	GTML1-dox_21	GTML1-dox_22	GTML1-dox_23	GTML1-dox_24	GTML1-dox_25	GTML1-dox_26	GTML1-dox_27	GTML1-dox_28	GTML1-dox_29	GTML1-dox_30	GTML1-dox_31	GTML1-dox_32	GTML1-dox_33	GTML1-dox_34	GTML1-dox_35	GTML1-dox_36	GTML1-dox_37	GTML1-dox_38	GTML1-dox_39	GTML1-dox_40	GTML1-dox_41	GTML1-dox_42	GTML1-dox_43	GTML1-dox_44	GTML1-dox_45	GTML1-dox_46	GTML1-dox_47	GTML1-dox_48
Acta1
Actb	20.2816	18.7335	18.9407	18.3534	18.9536	17.2313	19.0455	19.1028	18.4962	17.4529	19.1168	17.7937	17.2149	17.8677	17.2209	18.53	16.7571	18.3798	17.6625	18.3555	20.0614	16.6276	17.6675	17.9364	18.1181	18.8962	19.042	17.8485	17.5669	18.1613	18.4508	17.5781	17.1089	18.4844	18.8992		18.6152	17.8958	18.1779	17.7829	19.1012	18.4609	19.0401	19.4389	18.8815	19.3753	18.9684
Aldh2															21.3157							21.4913
Atf4	20.5614	18.7939	19.7411	20.403	20.3379	18.471	18.0775	19.2969	18.8433	17.1684	19.198	18.1044	17.9392	18.515	19.2761	19.4475	16.729	19.983	19.4949	19.0898	20.402	16.4094	18.1188	19.6152	19.2117	19.388	18.832	18.0705	18.0886	18.4209	18.7162	19.1643	16.6307	18.993	19.0163	20.9881	19.0367	18.9608	18.0993	19.6874	17.5715	19.4897	19.33	19.3558	18.9748	18.3501	19.5716
Atoh1
Atrx	20.2759	18.8508	19.6737	19.9331	18.9275	18.4604	20.973	19.8828	19.0701	18.4686	19.2347	19.0904	17.9494	18.1769	18.585	18.9817	17.9245	18.7292	19.3473	18.9873		17.1834	19.08	18.5543	18.7369	19.1084	19.0813	18.6891	17.5295	18.7737	18.0285	19.5232	18.1474	19.0894	19.5237	20.0763	18.8188	19.1639	18.6755	19.8817	19.4154	19.1785	18.9492	18.9866	19.216	19.1795	19.1407
Bcor		20.9057				20.8931							19.3951	20.7012	20.9517	20.1827	20.5124					20.0818											20.1231	20.8389		20.9322	19.6536			20.4235		20.8645	20.765		20.5185
beta-catenin
Bmi1		19.5167	20.531	20.2956	20.0124	20.6905	20.9558			19.2285	20.7226	18.9882	18.4542	19.5664	20.0642	19.9897	19.0935	19.925	19.3058	20.9		18.6158	19.9853	18.7861	20.03	19.8511	18.2386	20.4101	18.5589	20.9501	20.0995	19.4285	18.3421	19.8869	20.9744	19.8222	19.5324	19.7112	18.7378	19.2204	18.8971	19.1376	19.7403	19.2972	19.248	20.447	19.8379
Btg2	19.4326	17.7416	19.7208	20.1957	19.9891	18.4252	20.1907	18.5802	20.1525	19.1448	18.9527	17.9943	18.7649	18.4418	19.1365	18.2532	18.0397	19.2981	18.5609	18.2213		16.9037	19.2135	16.6011	17.5998	19.0154	17.8853	18.3881	18.4347	17.8189	17.7283	17.8985	16.6851	20.6476	18.185	20.9783	18.2697	18.1038	19.5675	19.5471		18.0493	17.8458	19.6475	17.8054	18.6659	18.6714
Ccne1													21.4562
CD133	21.5614			21.5374		20.0979	19.847	21.8703	21.6675	20.1817	21.3271	21.8938	21.0883	20.0062			20.3794		20.6461	21.9406		19.6851	21.3036	20.8242	19.2459	19.9096	19.0058			21.1741	20.2396		18.9758		19.8818		21.3323	20.8306			21.2375	20.2079	20.5074			21.0172	21.3278
Cd15
CDH18
Cdkn1a										21.6661			20.6098																21.8077
Crabp1
CyclinD1
Dkk2
Dppa3
Dyrk2																21.8634	21.7036	21.8628		21.8725		20.9876								21.1112	21.9674		20.8395			20.8474		21.1665	19.5911
E2F1						21.9144				20.9172			19.8956																20.0621					21.8561
E2F2(2)
Emx2														21.9477																									22.3836			22.3163
Eomes(2)
Esrrb
Fgf4
Fgf8
Foxd3
Foxp3
Fscn1	20.2557	18.2993	20.3361	19.4005	19.3064	18.4111	20.1318	19.5614	19.4687	19.5439	21.0076	18.0645	18.0633	17.9217	18.6041	18.5892	17.7566	18.5335	18.3723	19.7234	21.4742	17.5938	19.0606	18.7444	19.24	19.4584	18.9186	19.0961	18.2768	18.697	18.5336	19.6342	18.4152	18.4786	19.246	21.7498	19.8738	19.2594	18.4346	19.5879	19.1028	19.0484	18.5435	19.9513	19.3831	18.0962	19.0706
Gabra5
Gad1		19.2393	19.7967	19.1331	19.0354	18.3591	20.694	20.9748	18.8388	19.3477	19.2404	18.6245	18.4138	18.4546	19.5818	19.3576	17.8949	18.9899	19.243	19.0195	21.3944	17.4639	19.4055	19.2519	19.335	18.8141	19.9653	18.8828	17.2897	18.0867	18.2679	18.2789	18.0103	18.7261	19.8016	20.1788	19.1992	18.5718	18.3932	19.2439	20.2859	18.4858	18.6214	19.3788	19.5198	19.1281	19.4048
Gfap
Gli1
Gli2
Grb10																																										22.7451
Gstp1
Hoxb7
ImpG2	20.508	21.5594	21.6777	20.2217	22.2743	20.1028	22.5469	22.0627	22.938	22.8517	22.5026	20.7648	20.6219	21.1409	20.7057	20.9836	19.3673	22.0787	21.8482	21.4952		19.8259	20.9194		22.2246	22.3802			19.0631	22.1596	19.7404	19.8331	20.5074	22.4175	22.6089		21.0901	19.9243	22.0135	21.5955	20.9349	20.5283	20.9493		22.3125	19.6533	21.125
Inpp5f		20.7074			21.2074								20.8916				19.5049			21.4269		19.417		21.6535					21.9549	20.8888			21.6271		21.5593				20.5905				21.6808		20.2418
Irf1							22.4746																				22.9942
Jarid2		21.296		22.9095	21.9326		21.9489	22.176				20.8976	20.6256	20.2012		19.9106	21.6424	20.8242					22.8866	21.0203		22.3746	22.3289	21.5127	21.6309	22.28	20.8066	21.9497	21.2126	21.7071	21.8858	22.9287	22.0067	21.1115	22.1749	21.7715	21.7559	20.9009	22.352				21.8827
Kcna1																																				22.4789
Kdm5b	19.9788	19.5862	18.9414	20.6189	21.316	19.5228	20.2397	19.5187	20.8805	19.676	19.4246	18.8392	18.7251	19.0238	19.5305	19.4555	18.9651	20.2908	19.0942	20.4798	20.6104	17.8821	21.6805	18.4591	19.1786	19.8995	19.517	19.8278	21.7293	20.0853	20.0108	19.8922	18.1693	19.6265	19.7481	21.4032	18.5065	18.6465	20.5244	20.5606	19.9665	19.6572	19.3468	18.4647	19.6606	20.8702	19.6549
Kit										21.0892																				20.4979													21.6594
Klf2
Klf4										21.7488						22.9404						22.6183							21.2203	22.1973	22.5536							22.9477								22.0423
Klf5													21.6859																		21.9124																21.7589
Ldhb		22.217				21.773				22.1312	22.474		22.0923	20.9695		22.2477	22.2535					21.3704		22.523	22.6737		22.4366			20.4047		22.9193	20.5248	22.3909	20.5468		21.6236	21.6024		21.2459		21.0022	22.8354	20.9539	22.7139	22.6241
Lef1							21.6115		20.3941	19.8503											21.3909	19.7433		21.4002	21.0267							21.2763	19.8181	21.4618								21.5328	20.7064		21.6893
Lgr5
Lin28b
Lrrc2
Mpp3			20.5986				21.8824	21.6388		21.4752		20.6795	21.6354	20.2858			19.9503		21.9392	20.1419		21.1967	21.7148	20.9725	21.1678			20.6494	21.7743	20.9139		21.5607	19.9015	19.9848					19.6223					21.5051	20.9069	19.6864
Musashi	18.7059	17.3947	19.6811	18.8573	18.1018	18.2157	19.9114	18.3004	18.8352	17.9819	19.5034	17.7081	17.3519	17.3151	18.5209	18.7892	17.0885	18.8207	18.6051	18.9486	20.3867	16.3593	18.7283	17.5161	18.3186	17.648	17.91	17.6345	17.2149	18.156	18.1395	17.64	16.6592	17.6518	18.5495	19.7143	17.872	17.981	17.8825	17.8943	18.2267	17.9618	18.0587	18.761	17.9601	17.2922	18.2149
Myc
Mycl1
MYCN	25.7849	24.7541		25.0182		23.3312						25.9724	23.686	24.5701	24.6362	25.2257		25.6495	24.671			24.2565		23.2832			25.198	23.6241	24.1446		24.5324		21.9875	23.0613		25.0883		24.3458	22.3286	24.937	23.8841		24.2173		24.8906	25.2953	25.5041
Nanog
NeuroD1	18.5269	19.9634	22.555	19.4322	18.641	17.2755	20.4518	21.0328	19.155	19.2167	20.6139	19.4768	19.357	18.5164	18.3038	19.1976	17.652	19.3562	20.3818	19.557		18.6579	21.0204	18.9629		18.7411	20.6983	16.8153	17.1703		18.2096	18.0548	18.1014	19.8508		22.8004	21.605	17.3737	22.4908	19.4189	20.2401	18.2034	18.7429	19.2126	20.7097	18.8761	19.3068
NeuroD2
Nodal
Notch3
Npr3
Nr0b1
Nr5a2
Olig2
Otx2	19.3561	20.0812	22.49	20.2469	19.8272	19.1672	19.693	21.2591	20.5157	19.9466	20.5686	19.3812	19.6778	19.7874	18.4385	20.4109	19.2882	19.5491	19.5407	19.5702		18.5986	20.3592	19.6078	19.2489		20.5989	19.4988	19.1451	19.986	20.1114	19.19	18.8958	19.4536	20.7023		20.7444	20.4326	19.0791	20.6167	20.3934	18.7728	19.6703	22.5229	19.928	19.9657	19.7513
Pabpc1		19.843	19.749	19.4075	19.3534	18.8036	20.1873	19.7553	20.0253	18.6671			18.5932	20.3059	19.1767	18.6206	18.3981	18.5069	18.4128	19.8218		17.4495	19.2224	19.0587			18.1578		18.3784	18.7157	18.7582	19.7943	16.3432	18.3795	19.0574	19.5882	19.9309	18.8067	17.2812		18.8368	18.2477	20.8968	20.207	19.382	19.0199	18.9176
Pax6						20.9046																		22.7324		21.9645	22.8552	22.4817		22.3369		21.9948	21.746	21.5844				22.6874
Pdgfa																			21.9352			20.312					21.7248						20.9228
Peg3	21.9569	21.8829	21.1249	22.6407		21.5269	19.8947		22.7063	20.0261			19.195	21.2384		20.6705	19.6173	22.0649	20.7298			20.2188	21.223	22.0714	21.393	20.5637	22.2754	22.0349	19.8118	19.4306	21.1538		20.4765	19.8671	18.8661	20.8707	22.8079	19.7758	21.3839	22.9562	22.0184	21.8758		22.709	22.3769	21.0649	21.6593
Pgk1		22.7853			22.9044					22.919			22.453									22.1495	22.8195	22.4898						22.9754		22.9743					21.8856						22.9893
Phosducin						22.4035	19.5268				22.7455		21.8062	21.309						22.9401				22.3662						19.4689												21.4807
Pitx2																	22.6689																22.8548						21.8431
Pml															21.5391
Pou5f1/Oct4
Ptch	21.3798	21.9573			21.8939	21.7762			21.6214		22.1946	21.6257	20.8994	22.1001			20.5907	22.4788	21.2351			20.731	21.5904	22.4195		20.7245			20.8611		21.5005		21.8803	21.4224	21.5419					22.1041			21.7851			21.1844
Rac3																												21.8824
Rest	21.3328	21.7087		21.7191	20.1559				21.304							21.8377			21.3464			20.5535		21.1653		21.9064	21.3863				21.4492		20.0903						21.9526		21.3953			21.5128			21.1646
Ret S ant	20.5123	18.3802	17.8509	19.673	19.9376	16.7968	19.714	18.2381	20.9654		18.9216	18.0528	18.5827	19.0313	17.7447		17.7732			17.6321	21.4758	17.3081	20.1908	19.0454	19.6428		18.6711	18.3754	18.6984	16.6219	19.2316		19.3506	20.8061			21.2543	20.7583	18.4446	20.3241	18.2632	18.4254	18.7799			16.2154	20.4628
Runx2																																										23.7057
S100b
Sall1	16.5915	18.6433	18.9165	17.547	17.1209	16.8617		19.5215	17.7657	17.8278	20.6052	17.4081	18.0167	17.3698	16.282	20.0568	15.5692	19.2012	17.5708	17.9349	19.9326	16.4145	18.6332	17.6801	19.7866	18.2414	18.1198	19.4016	16.995	17.8432	17.1366	17.6997	16.2702	17.553	20.0489	20.8089	18.1512	18.5749	18.8947	17.2592	20.4928	17.5441	17.5867	18.3462	18.3513	16.4102	17.9645
Sfrp1
Sox2																																							21.8401
Sox9	20.8661	21.7295								21.6005			20.9449				22.4757	20.1487				20.2702		21.2836									19.627										22.3619
T										22.437												22.8637	22.7815		22.9078					22.8267						22.0386				21.4745		22.8856
Tbp		21.6891		21.825	21.488	20.2604	21.254		21.5221	20.9089	21.4003		19.7496	20.3055	21.1041	21.7925	20.0393		20.6884			20.0347		20.7978	21.5704	21.7039			20.5658	21.8894	20.4054		21.2035	21.0217	21.9469	21.6169	21.7007	20.5901	21.192		20.9597	20.618	21.6402		21.6678	20.6457	20.8085
Tbx3
Tcl1
Trip10						22.0599																			22.2379				22.7669
Tuj1
Whsc2						21.496											21.8643		21.7623									21.7859	21.0877												21.9272
Wif1
Zfx	20.3169	21.3719	22.7243	19.5943	20.1694	20.44	20.8482	20.7624	20.7389	20.6667	20.3483	19.7604	19.6095	18.9729	20.1732	19.0299	18.7356	20.356	19.9275	21.1005		18.6329	19.7855	20.9774	19.7405	21.6972	22.5248	19.2525	18.8944	19.101	19.0935	20.0653	18.975	20.9274	20.317	19.5011	21.0303	18.7772	21.588	20.2841		21.657	20.3422	20.5816	20.8933	19.9428	20.9435

## Sheet: GTML MLN Transpose
cell	GTML1-MLN_01	GTML1-MLN_02	GTML1-MLN_03	GTML1-MLN_04	GTML1-MLN_05	GTML1-MLN_06	GTML1-MLN_07	GTML1-MLN_08	GTML1-MLN_09	GTML1-MLN_10	GTML1-MLN_11	GTML1-MLN_12	GTML1-MLN_13	GTML1-MLN_14	GTML1-MLN_15	GTML1-MLN_16	GTML1-MLN_17	GTML1-MLN_18	GTML1-MLN_19	GTML1-MLN_20	GTML1-MLN_21	GTML1-MLN_22	GTML1-MLN_23	GTML1-MLN_24	GTML1-MLN_25	GTML1-MLN_26	GTML1-MLN_27	GTML1-MLN_28	GTML1-MLN_29	GTML1-MLN_30	GTML1-MLN_31	GTML1-MLN_32	GTML1-MLN_33	GTML1-MLN_34	GTML1-MLN_35	GTML1-MLN_36	GTML1-MLN_37	GTML1-MLN_38	GTML1-MLN_39	GTML1-MLN_40	GTML1-MLN_41	GTML1-MLN_42	GTML1-MLN_43	GTML1-MLN_44	GTML1-MLN_45	GTML1-MLN_46	GTML1-MLN_47
Acta1
Actb	19.2865	18.7085	19.0242	18.7947	20.2839	18.9076	17.8667	19.5144	17.5707	17.9285	19.0614	19.8243	17.9963	17.6339	18.3225	18.6085	18.2581	18.3809	17.7281	18.3584	18.9059	18.8846	17.8815	17.9599	18.2732	19.5867	18.5698	17.5243	19.2848	19.3374	18.715	19.1891	17.7647	17.4633	18.3589	16.9403	18.0498	18.015	18.6649	18.2167	18.4209	18.1611	18.8921	19.0327	18.2742	19.5101	18.9533
Aldh2				21.8567							21.1667								21.8991									20.1611			21.3822					21.1944
Atf4	16.3582	16.9216	16.9176	16.2395	16.7689	16.7753	16.1024	17.4658	15.0251	16.2061	16.3391	18.562	16.4818	15.7378	16.2388	15.9354	17.1299	15.714	15.8677	16.5107	16.22	16.7619	16.5541	16.4063	16.1942	17.403	16.5742	14.7691	17.5612	16.5998	16.155	16.9082	15.9762	15.5116	17.9522	16.0314	16.5098	16.6867	15.749	16.598	16.4241	16.4642	18.0132	17.3476	15.3425	16.6112	16.311
Atoh1									21.7904														21.8549					21.3813									21.8067
Atrx	19.533	19.1335	21.3365	20.0957	20.5311	19.8384	19.0043	19.9709	17.931	18.8858	20.0417		18.4688	17.8726	19.6288	17.992	19.0977	19.1106	18.227	19.4109	19.273	19.2021	19.4706	19.8578	19.0591	19.8612	19.4153	17.8702	19.6498	20.3792	19.0332	18.279	19.6955	19.3188	19.311	18.1283	18.6627	18.552	18.6743	19.5301	19.3578	19.4345	21.2983	19.3291	18.2154	19.1931	19.1642
Bcor									20.5095	20.8603								20.224	19.7796																									20.7435
beta-catenin
Bmi1	18.9982	19.7893	19.2348	19.7735	20.1052	18.4438	18.7876		17.854	19.3394	18.8149			18.4649	19.2827	19.8341	19.498	18.8359	18.4543	20.3608	18.8168	20.1193	18.6374	19.1136	19.0721	19.3019	19.4375	17.7336	20.5737	19.8974	18.8844	20.0999	17.9508	18.6476	18.9055	17.9014	18.0671	18.5418	18.0008	18.9312	19.1566	19.0298	18.8825	19.221	18.3731	19.2627	19.5673
Btg2	20.4368	19.8341	20.057	19.5958	20.156	21.8225	20.8993	20.9926	18.3341	18.2628	20.4472	21.886	18.8919	18.0703	19.8492		19.9853	20.5809	18.8743	19.984	20.4324		19.2477		17.909	19.7466	20.8186	19.1328			20.5757	19.6989	19.7929	19.5874	18.981	18.4126	20.5461	19.248	20.9189	19.9325	20.7659	18.9851	20.5212		19.5403	21.9254
Ccne1									20.9229	21.5389									20.778				21.8223				21.8828						20.9187			20.7414		20.5387	18.9561
CD133		21.9136							19.6773				21.2646	20.5273	21.691				21.7017			21.8712	21.627		21.7098	21.2517					20.9375			21.5862	20.555	19.7591		21.6137				20.7223	21.221		21.0631
Cd15																																					20.472
CDH18
Cdkn1a	21.7434		21.8681	21.6514			21.8681		20.66	18.413	20.4765		21.1083		21.7266			21.2727	20.7924	21.8657		19.9184			21.8576			19.3516		20.4626	20.7428		21.4543		21.8358	20.2328	21.2675	21.4855	21.3605	20.3848	20.7237			20.7139			21.5176
Crabp1
CyclinD1
Dkk2
Dppa3
Dyrk2									21.4677	21.9079											21.3672						21.8306									21.6473							21.9407		21.6777
E2F1									21.9394	19.9116						20.3414			20.8607			21.4429											20.959	20.0183		19.6765	20.4233	20.9834	19.6551								21.5388
E2F2(2)
Emx2										21.9048
Eomes(2)
Esrrb
Fgf4
Fgf8
Foxd3
Foxp3
Fscn1	18.7557	20.2241	20.7177	19.9645	20.981	18.6605	19.3895	19.7904	18.2968	19.5433	20.0255	20.4905	18.8467	18.5788	18.8825	19.0794	19.7993	19.4661	18.5307	21.2143	18.7937	20.5014	19.7072	19.9575	18.8518	20.5221	19.3613	18.4034	22.7321	19.94	19.4458	19.9703	20.5587	19.0586	19.2241	18.8111	18.8325	19.715	19.0879	20.0265	19.5764	19.8744	20.6384	19.9567	18.3205	21.1843	19.7008
Gabra5
Gad1	18.7299	19.1523	18.9764	20.0259	20.0449	18.452	18.9121	19.5425	18.0096	18.5228	18.6328		18.8082	18.9663	18.8036	18.2444	19.221	18.448	18.2325	18.4136	19.1008	20.5765	18.8504	19.0706	18.6749	18.7687	19.5921	17.5336	19.5195	19.2071	18.9653	19.0225	17.6805	18.7493	19.0627	17.7262	17.3027	18.2743	18.0959	19.814	18.8996	18.9045	19.2455	19.0128	17.6155	19.3103	19.7218
Gfap
Gli1
Gli2
Grb10			20.3949					22.1825	20.6943		20.9375		20.9155	20.1571		21.3718	20.3345	21.7458	22.2064		21.5591		21.4513		20.6267	22.762		21.2748	22.9617			19.6916	22.3015	20.6815	21.0585	21.6807	21.7415	22.3327				22.2109			21.5027	20.7618
Gstp1
Hoxb7
ImpG2									20.151					21.5856							21.6993					22.9559				21.9254		21.4217		22.9264			20.7813	22.0371				21.2267			21.0947
Inpp5f		21.0103	20.5836	21.4271		21.1709	21.1052	21.4941	20.7839	20.5578	20.5089						21.035	20.4866	20.6619			20.6348	20.8671	21.9195	21.2015		21.8713	20.6421	21.1553	21.9612			21.6437	21.3631		20.4532	20.5804	20.8982	21.0007		21.9224	21.3122			20.5963
Irf1						22.7467			22.7353		22.7266																							22.3812													22.3712
Jarid2									20.6608		21.9143		22.6241	22.6108	21.5336	22.2441	21.6975		22.1283			22.3286	22.4321				22.6675	21.7038		22.5995		21.4096	22.1378											22.5216	20.835
Kcna1
Kdm5b	20.3111	20.7986	19.3145	21.924		20.4574	21.5081	20.5921	18.9768	20.2458	19.7346	22.8482	20.0946	19.8267	20.1151	19.4089	19.7427	19.3833	20.6441	19.8937	19.651	20.6042	20.2781	19.8854	19.7143	20.2355	21.8728	18.9817	20.4757	20.7168	20.8061	21.1242	20.1047	21.2459	19.9304	19.9806	20.5816	20.7173	23.8602	21.1903	20.6324	19.9291	22.5867	20.9541	19.8442	20.2259	22.6842
Kit							19.9478		19.4774								21.9807	21.8807			20.2683		20.0326									21.4524		21.8437	21.8628	19.7005	21.744	21.3997	19.2541						21.7067
Klf2
Klf4		22.0268								21.2214																			21.8761		22.9757			21.9437		21.1563	20.6428	21.1798	20.6199						22.9912		21.721
Klf5																												21.5297								21.3156		20.5961									21.9793
Ldhb		22.2886				22.3118	21.5879		21.2867		22.1785	21.6951	21.563	22.1904	21.955	22.6767		21.2916	22.1912		22.2204	22.2032	21.7671		20.7325			20.0487		22.5196	21.9893			21.0308		20.7338	20.2038	22.7864				20.6739		22.3879	22.7785
Lef1		21.1085	20.4612	21.829	21.6919		19.6468	21.3675	19.8157	19.8946	21.0073		20.1429		19.9182		19.5196	20.464					20.6906		20.2381	21.6481	19.8141				20.8698	20.5732		20.8008	19.5989		21.6893	21.4847	19.7496	20.21	20.5476	19.3999	21.8076		20.3454
Lgr5
Lin28b
Lrrc2
Mpp3			21.8693	21.5702		21.4453	20.5568		20.4309	20.362	21.0212		21.9902			20.9221		21.8096	21.4914			21.8533		20.563	21.5179	21.4442	20.9676	19.7412		21.7229				21.1618	20.7382	21.706	21.0449	21.018	20.9891		20.2272	21.689			21.1052
Musashi	19.5517	20.1816	20.2898	19.2439	19.9151	19.514	19.7166	21.755	17.8209	17.7134	20.8927	21.4008	19.7124	18.8463	20.2459	18.8507	20.4366	20.3275	18.6631	20.4111	19.9825	19.8396	19.6184	19.8744	18.8247	20.1846	19.3417	18.1505	20.4138	19.7578	19.5844	20.0885	19.9045	17.6531	18.7666	18.0935	17.7163	19.4581	18.7324	18.7635	19.472	19.4573	19.3911	19.8267	19.3755	20.1182	20.2577
Myc
Mycl1
MYCN	19.7155	18.985	18.2444	19.9788	20.2079	18.0078	19.0492	18.4602	19.1559	20.4918	18.9723	21.6583	19.5536	19.6184	19.4127	22.9376	20.358	19.3675	19.6696	20.4644	20.0453	24.0452	20.1028	19.6302	18.1099	17.528	19.528	18.4331	19.7047	21.3131	18.4999	18.5808	17.9196	19.8418	19.6484	18.5658	20.2294	18.589	21.268	20.7951	19.6368	19.2898	21.0011	20.2124	18.0137	19.9334	22.9203
Nanog
NeuroD1	19.9845		21.3108			21.4098	19.7875		20.0163	19.5949	21.7554	22.8311	20.3557	20.6374	22.4232			22.824	19.5984	21.9424	20.0219		20.0725	19.7959	20.194		19.8666	19.9858	20.6421	20.7888	18.6377	22.1285	20.033	20.3053	20.0902	17.8788	20.8922	22.0392	20.9597	21.4529		19.099	22.6026	18.1891	19.7298		22.8625
NeuroD2
Nodal
Notch3
Npr3
Nr0b1
Nr5a2
Olig2
Otx2	22.3878	22.8013		21.2616		21.0715	21.2092		19.0567	20.8352	21.9585		20.2377	21.1498	22.6974	20.24	20.9602	21.5566	20.7356		22.8401	21.7546	20.2824	20.4826	20.5257	21.3754	21.3499	20.1849		20.9157	22.7198	20.6267	21.115	21.5638	20.6524	19.3103	21.1918	21.2768	20.7869	22.7466		21.0632	22.1039	21.346	20.5212		22.6592
Pabpc1	17.731	19.4784	17.95	18.9862	19.2015	18.4364	19.1088	18.6623	17.391	17.9483	17.9432	20.1181	17.4695	17.5734	18.0031	18.4729	17.9131	17.8462	18.5796	17.933	18.6063	17.682	18.6528	17.621	17.682	17.6756	19.0215	16.9863	20.2577	18.8839	18.7082	19.2613	18.4113	18.482	18.6901	18.3751	17.3835	17.724	17.5881	19.1793	18.2496	17.6175		18.9846	16.9941	18.3698	18.6161
Pax6																22.9477																		21.5739					22.1255
Pdgfa							21.5985		20.9431	21.1594	21.4754			21.7945		20.733	21.4338	21.3468	20.0359						21.6883	21.6153	20.7099	19.756					21.5905	21.8478		21.3168	20.9668		21.3332		20.8367				20.4736	21.444
Peg3	22.4579	21.4681	21.2319	21.5399	22.4638		20.7124	22.5727	19.7327	19.4539	20.596		21.6398	20.3838	21.8707	19.3614	20.5952	20.9925	19.3396	21.1347	22.3397	19.4196	21.9152	20.6071	20.1604	22.5532	21.7073	20.5569	22.5671	20.0586	21.7816	21.8253	19.8508	21.0191	20.8467	18.5326	19.4856	19.0739	19.6342	22.126	21.7302	21.8273	22.6585	20.6192	19.5903	20.8448	19.6539
Pgk1									22.4758	22.6803							22.29	22.8171					22.6585										22.5266	22.9189						22.8399	22.889	22.9464	22.6466		21.5117
Phosducin
Pitx2									22.5434														22.874													22.4055				22.5754	22.9086
Pml																									22.3939																						22.7552
Pou5f1/Oct4
Ptch	21.8714	22.0411	20.8349			21.7775	21.4087	21.6002	21.121	21.9991	20.1974		22.1867	20.7135	22.2749			21.569	22.2298			21.4473		21.7248	21.2743		21.058	20.3647	21.2679		22.1463		21.6811	20.8844	22.2981		20.3989	22.2619	21.2964	21.6022	22.1095	21.1402		22.043	20.2049	21.8688
Rac3								21.7368																													21.8245		21.0564			21.1967
Rest		20.3774		21.7935						21.3439								21.694										21.4864				21.7111	21.8146	20.7845		19.6372	19.7473	19.6998	21.218	21.512		21.4624			20.2188	21.1443
Ret S ant				20.5663		21.1713			19.1259		20.1431		20.418						18.9102			21.74	19.0485	21.3018	21.117		21.9903	19.7194			20.1363	21.2125	21.9763	20.263			18.8401		19.4389						18.1184		21.1076
Runx2
S100b
Sall1	20.5959	19.7536	21.096	19.7004	20.2541	19.2318	18.3238	21.9996	17.9916	18.9567	20.3312		18.9987	17.5465	21.9989	17.3539	20.9033	19.4997	18.0004	20.4306	19.9861	20.3755	18.1048	19.6023	19.1692	20.7239	20.637	20.5706	20.3139	18.7653	19.4047	19.4633	20.4562	19.5859	19.6778	16.6805	18.7071	20.1436	18.564	18.9612	20.2559	18.3033	19.6857	19.1772	18.6069	19.8591	20.3902
Sfrp1
Sox2							22.911		22.2596	22.969																										22.7019									22.9104
Sox9		22.6137	21.9669				22.1212			22.2383			21.7437						22.4329						22.8642																				21.5111
T	22.7241																22.8689					21.2864						21.8597	22.8088						22.4567	22.3154	20.8639		21.0912	21.2893		21.5897
Tbp	20.9231		21.4932	21.831		20.7796	20.2745	21.3664	20.8604	19.4392	21.6922		21.8198	20.2626	20.6673	19.9063	21.1989	21.3575	20.3683	21.0052	21.2427	20.5159	20.8772	21.3882	20.6894	21.8002	21.1842	19.5908	21.6212	21.6046		21.2644	20.3492	20.6965	20.9568	21.1028	20.0116	20.3274	19.5438	20.4548	21.8181	21.0394		21.6569	20.1318		20.8363
Tbx3
Tcl1
Trip10																																				22.9833		22.8859
Tuj1
Whsc2		21.5834				21.217			21.2558					21.6885	21.9337				21.1247									21.6064								20.2874					21.0831	20.3065	20.8712		20.4552
Wif1
Zfx	19.5209	20.3684	21.4203	20.9037	21.4158	20.258	19.0105	21.6024	18.8014	20.2644	19.3435	21.0476	19.2708	19.5927	20.3338	18.6598	19.9804	19.3241	19.6738	20.309	20.5526	20.7187	20.8405	19.7224	22.3041	19.8408		18.4591	20.5883	20.0041	21.6264	20.67	18.9246	18.5366	21.4829	19.0163	19.0135	19.6494	18.9394	20.1306	19.6844	19.7228	20.9482	19.4153	18.0575	19.6462	20.1312
